# Supplementary material for: Synthesis of azepane-fused pyrano[3,2-b]indoles by Lewis acid-catalysed oxa Diels–Alder reactions
Source: Royal Society of Chemistry journal article supplement (doi:10.1039/d3ob00234a), 2023-01-01
Supplement: d3ob00234a1.pdf [file d3ob00234a1.pdf]

## Electronic Supplementary Information

### Synthesis of azepane-fused pyrano[3,2-*b*]indoles by Lewis acid-catalysed oxa Diels-Alder reactions

Saikumar Banda,<sup>a</sup> Alexander Villinger<sup>a</sup> and Malte Brasholz<sup>a,b\*</sup>

<sup>a</sup>University of Rostock, Institute of Chemistry, Albert-Einstein-Str. 3a, 18059 Rostock, Germany.

<sup>b</sup>Leibniz-Institut für Katalyse e.V., Albert-Einstein-Str. 29a, 18059 Rostock, Germany.

Email: malte.brasholz@uni-rostock.de

#### Contents:

|                                                  |       |
|--------------------------------------------------|-------|
| 1 General information                            | 2     |
| 2 Synthesis of substrates                        | 2-8   |
| 3 Lewis acid-catalysed oxa Diels-Alder reactions | 9-17  |
| 4 Additional synthetic experiments               | 18-20 |
| 5 X-Ray crystal structure of compound <b>5aa</b> | 21    |
| 6 Structure assignment by NOESY spectra          | 22    |
| 7 NMR spectra                                    | 23-47 |

## 1 General information

Commercially available chemicals were used as received from suppliers unless otherwise noted. Dry solvents used were obtained from suppliers in serum-cap quality. Solvents for chromatographic separation were distilled twice prior to use. Thin-layer chromatography was carried out using silica-coated aluminium plates, silica 60 F<sub>254</sub>, Merck. Column chromatography was performed with silica 60 (230-400 mesh, Macherey-Nagel). NMR spectra were recorded on Bruker AVANCE 500 NEO and Bruker AVANCE 300 III instruments, and spectra were calibrated against the (residual) solvent resonances of CDCl<sub>3</sub> ( $\delta^H = 7.26$  ppm,  $\delta^C = 77.0$  ppm), CD<sub>3</sub>OD ( $\delta^H = 3.31$  ppm,  $\delta^C = 49.0$  ppm) and CD<sub>3</sub>CN ( $\delta^H = 1.94$  ppm,  $\delta^C = 118.3$  ppm). <sup>1</sup>H- and <sup>13</sup>C-NMR peak assignments were made based on 2D NMR spectra. IR spectra were obtained using a Nicolet 380 FT-IR spectrometer by Thermo Fisher Scientific. ESI-TOF HRMS spectrometry was performed using an Agilent 1200/6210 Time-of-Flight LC-MS instrument. EI HR mass spectra were obtained from a Thermo Electron MAT 95-XP instrument. X-Ray crystallographic analyses were performed on Apex Kappa-II and D8 QUEST instruments by Bruker-AXS.

## 2 Synthesis of substrates

The synthesis of the perhydroazepino[1,2-a]indole acetates **2** was performed by sensitized cascade photooxygenation of cycloheptaindoles **1** followed by acetylation, according to the protocols described in detail previously in references [1] and [2].

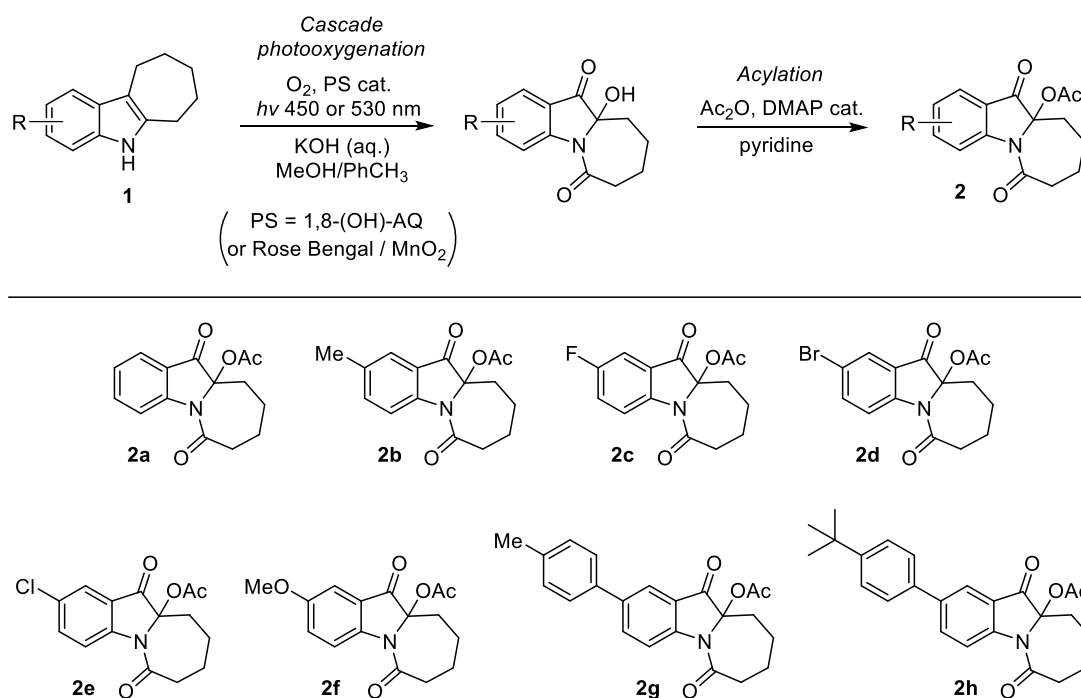

**Scheme 1.** Synthesis of perhydroazepino[1,2-a]indole acetates **2**.

- [1] M. Frahm, T. von Drathen, L. M. Gronbach, A. Voss, F. Lorenz, J. Bresien, A. Villinger, F. Hoffmann, M. Brasholz, *Angew. Chem. Int. Ed.*, 2020, **59**, 12450-12454.
- [2] L. M. Gronbach, A. Voss, M. Frahm, A. Villinger, J. Bresien, D. Michalik, M. Brasholz, *Org. Lett.*, 2021, **23**, 7834-7838.

Acetates **2** were subsequently subjected to an organophosphate-catalysed dehydroacetoxylation to furnish tricyclic enones **3**.

### General procedure 1:

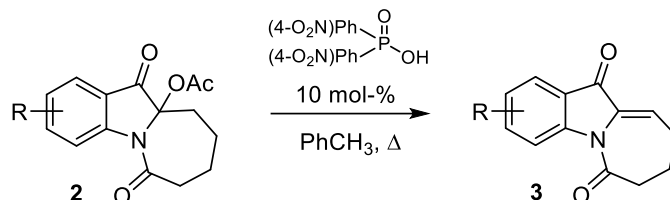

Azepinoindole acetate **2** was dissolved in PhCH<sub>3</sub> in a 10 mL crimp cap vial. Bis(4-nitrophenyl)phosphoric acid (BNPP, 10 mol-%) was added. The vial was sealed and air was replaced by argon via cannula during three freeze-pump-thaw cycles. The mixture was stirred at 120 °C for 16 h (heating in an oil bath), then cooled to r.t. and concentrated to dryness. Column chromatography over silica gel afforded pure enone product **3**.

### 8,9-Dihydro-6*H*-azepino[1,2-*a*]indole-6,11(7*H*)-dione (**3a**)

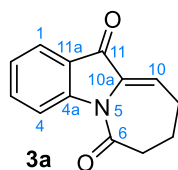

According to general procedure 1, acetate **2a** (250.0 mg, 0.91 mmol), and BNPP (30.0 mg, 88.1 μmol) in PhCH<sub>3</sub> (3.00 mL) gave enone **3a** (colorless solid, 185.0 mg, 94%) after chromatography (silica gel, Et<sub>2</sub>O/PhCH<sub>3</sub> 1:3).

**R<sub>f</sub>** = 0.21 (silica, Et<sub>2</sub>O/heptane 1:3), **m.p.** = 120-130°C.

**<sup>1</sup>H-NMR** (300 MHz, CDCl<sub>3</sub>): δ = 8.48 (dt, *J* = 8.4, 0.7 Hz, 1 H, 4-H), 7.82 (ddd, *J* = 7.6, 1.4, 0.7 Hz, 1 H, 1-H), 7.64 (ddd, *J* = 8.4, 7.6, 1.4 Hz, 1 H, 3-H), 7.25 (td, *J* = 7.6, 0.7 Hz, 1 H, 2-H), 6.72 (t, *J* = 4.5 Hz, 1 H, 10-H), 2.88 – 2.81 (m, 2 H, 7-H), 2.64 (td, *J* = 6.3, 4.5 Hz, 2 H, 9-H), 2.12 – 2.00 (m, 2 H, 8-H) ppm.

**<sup>13</sup>C-NMR** (126 MHz, CDCl<sub>3</sub>): δ = 183.6 (C-11), 171.7 (C-6), 149.3 (C-4a), 136.5 (C-3), 134.3 (C-10a), 124.8 (C-2), 124.1 (C-1), 123.8 (C-11a), 122.3 (C-10), 118.7 (C-4), 39.1 (C-7), 29.4 (C-9), 19.9 (C-8) ppm.

**IR:**  $\tilde{\nu}$  = 3330, 2950, 2840, 1720, 1660, 1470, 1450, 1405, 1310, 1120, 1025, 620 cm<sup>-1</sup>.

**HRMS** (ESI+): *m/z* calc. for C<sub>13</sub>H<sub>12</sub>NO<sub>2</sub><sup>+</sup> [M+H]<sup>+</sup>: 214.0868, found: 214.0873.

## 2-Methyl-8,9-dihydro-6H-azepino[1,2-a]indole-6,11(7H)-dione (**3b**)

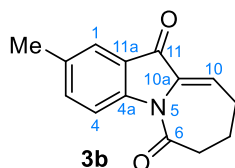

According to general procedure 1, acetate **2b** (261.0 mg, 0.91 mmol), and BNPP (30.0 mg, 88.1  $\mu$ mol) in PhCH<sub>3</sub> (3.00 mL) gave enone **3b** (colorless solid, 125.0 mg, 60%) after chromatography (silica gel, Et<sub>2</sub>O/PhCH<sub>3</sub> 1:3).

$R_f$  = 0.41 (silica, Et<sub>2</sub>O/PhCH<sub>3</sub> 1:3), **m.p.** = 122-129°C.

**<sup>1</sup>H-NMR** (300 MHz, CDCl<sub>3</sub>):  $\delta$  = 8.42 (dd,  $J$  = 8.5, 0.7 Hz, 1 H, 4-H), 7.61 (dt,  $J$  = 2.0, 0.7 Hz, 1 H, 1-H), 7.45 (ddd,  $J$  = 8.5, 2.0, 0.7 Hz, 1 H, 3-H), 6.70 (t,  $J$  = 4.5 Hz, 1 H, 10-H), 2.86 – 2.81 (m, 2 H, 7-H), 2.63 (td,  $J$  = 6.4, 4.5 Hz, 2 H, 9-H), 2.40 (s, 3 H, Ar-CH<sub>3</sub>), 2.11 – 2.00 (m, 2 H, 8-H) ppm.

**<sup>13</sup>C-NMR** (75 MHz, CDCl<sub>3</sub>):  $\delta$  = 183.6 (C-11), 171.5 (C-6), 147.5 (C-4a), 137.5 (C-3), 134.7 (C-2), 134.6 (C-10a), 123.90 (C-1), 123.86 (C-11a), 122.0 (C-10), 118.4 (C-4), 39.1 (C-7), 29.4 (C-9), 20.8 (Ar-CH<sub>3</sub>), 19.9 (C-8) ppm.

**IR:**  $\tilde{\nu}$  = 3350, 3050, 2945, 1710, 1685, 1645, 1590, 1485, 1435, 1370, 1340, 1290, 1170, 1065, 960, 820, 770 cm<sup>-1</sup>.

**HRMS** (ESI+):  $m/z$  calc. for C<sub>14</sub>H<sub>14</sub>NO<sub>2</sub><sup>+</sup> [M+H]<sup>+</sup>: 228.1024, found: 228.1025.

## 2-Fluoro-8,9-dihydro-6H-azepino[1,2-a]indole-6,11(7H)-dione (**3c**)

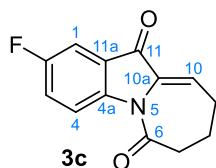

According to general procedure 1, acetate **2c** (131.0 mg, 0.45 mmol), and BNPP (16.9 mg, 49.7  $\mu$ mol) in PhCH<sub>3</sub> (3.00 mL) gave enone **3c** (colorless solid, 75.0 mg, 72%) after chromatography (silica gel, Et<sub>2</sub>O/PhCH<sub>3</sub> 1:3).

$R_f$  = 0.45 (silica, Et<sub>2</sub>O/PhCH<sub>3</sub> 1:3), **m.p.** = 123-127°C.

**<sup>1</sup>H-NMR** (300 MHz, CDCl<sub>3</sub>):  $\delta$  = 8.54 (ddd,  $J_{H,H}$  = 9.1, 0.5 Hz,  $J_{F,H}$  = 4.2 Hz, 1 H, 4-H), 7.45 (ddd,  $J_{H,H}$  = 2.8, 0.5 Hz,  $J_{F,H}$  = 6.8 Hz, 1 H, 1-H), 7.34 (ddd,  $J_{H,H}$  = 9.1, 2.8 Hz,  $J_{F,H}$  = 8.6 Hz, 1 H, 3-H), 6.74 (t,  $J$  = 4.6 Hz, 1 H, 10-H), 2.87 – 2.81 (m, 2 H, 7-H), 2.64 (td,  $J$  = 6.4, 4.6 Hz, 2 H, 9-H), 2.11 – 2.01 (m, 2 H, 8-H) ppm.

**<sup>13</sup>C-NMR** (75 MHz, CDCl<sub>3</sub>): δ = 182.7 (C-11), 171.5 (C-6), 159.7 (d, *J*<sub>C,F</sub> = 246.7 Hz, C-2), 145.6 (d, *J*<sub>C,F</sub> = 1.8 Hz, C-4a), 134.5 (C-10a), 125.2 (d, *J*<sub>C,F</sub> = 7.6 Hz, C-11a), 123.6 (d, *J*<sub>C,F</sub> = 23.8 Hz, C-3), 123.3 (C-10), 120.3 (d, *J*<sub>C,F</sub> = 7.4 Hz, C-4), 109.8 (d, *J*<sub>C,F</sub> = 23.5 Hz, C-1), 38.9 (C-7), 29.4 (C-9), 19.8 (C-8) ppm.

**<sup>19</sup>F-NMR** (282 MHz, CDCl<sub>3</sub>): δ = -116.74 ppm.

**IR:**  $\tilde{\nu}$  = 3210, 2965, 2930, 2880, 1735, 1675, 1525, 1485, 1455, 1380, 1265, 1235, 1195, 1105, 1035, 810, 755 cm<sup>-1</sup>.

**HRMS** (ESI+): *m/z* calc. for C<sub>13</sub>H<sub>11</sub>FNO<sub>2</sub><sup>+</sup> [M+H]<sup>+</sup>: 232.0773, found: 232.0776.

### 2-Bromo-8,9-dihydro-6*H*-azepino[1,2-*a*]indole-6,11(7*H*)-dione (**3d**)

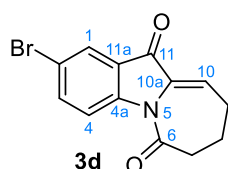

According to general procedure 1, acetate **2d** (157.0 mg, 0.45 mmol), and BNPP (15.3 mg, 44.9 μmol) in PhCH<sub>3</sub> (3.00 mL) gave enone **3d** (colorless solid, 102.0 mg, 78%) after chromatography (silica gel, Et<sub>2</sub>O/PhCH<sub>3</sub> 1:3).

*R<sub>f</sub>* = 0.28 (silica, Et<sub>2</sub>O/heptane 1:3), *m.p.* = 129-134°C.

**<sup>1</sup>H-NMR** (300 MHz, CDCl<sub>3</sub>): δ = 8.44 (dd, *J* = 8.9, 0.4 Hz, 1 H, 4-H), 7.91 (dd, *J* = 2.2, 0.4 Hz, 1 H, 1-H), 7.71 (dd, *J* = 8.9, 2.2 Hz, 1 H, 3-H), 6.73 (t, *J* = 4.5 Hz, 1 H, 10-H), 2.87 – 2.80 (m, 2 H, 7-H), 2.64 (td, *J* = 6.3, 4.5 Hz, 2 H, 9-H), 2.10 – 2.00 (m, 2 H, 8-H) ppm.

**<sup>13</sup>C-NMR** (75 MHz, CDCl<sub>3</sub>): δ = 182.1 (C-11), 171.6 (C-6), 147.9 (C-4a), 138.8 (C-3), 134.0 (C-10a), 126.7 (C-1), 125.5 (C-11a), 123.2 (C-10), 120.3 (C-4), 117.9 (C-2), 39.0 (C-7), 29.4 (C-9), 19.7 (C-8) ppm.

**IR:**  $\tilde{\nu}$  = 3315, 2970, 2925, 2880, 1715, 1675, 1600, 1515, 1465, 1380, 1260, 1185, 1100, 1030, 875, 800, 755 cm<sup>-1</sup>.

**HRMS** (ESI+): *m/z* calc. for C<sub>13</sub>H<sub>11</sub><sup>79</sup>BrNO<sub>2</sub><sup>+</sup> [M+H]<sup>+</sup>: 291.9973, found: 291.9973.

### 2-Chloro-8,9-dihydro-6*H*-azepino[1,2-*a*]indole-6,11(7*H*)-dione (**3e**)

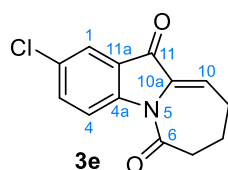

According to general procedure 1, acetate **2e** (138.0 mg, 0.45 mmol), and BNPP (16.9 mg, 49.7  $\mu$ mol) in PhCH<sub>3</sub> (3.00 mL) gave enone **3e** (colorless solid, 96.0 mg, 86%) after chromatography (silica gel, Et<sub>2</sub>O/PhCH<sub>3</sub> 1:3).

**R<sub>f</sub>** = 0.28 (silica, Et<sub>2</sub>O/heptane 1:3), **m.p.** = 127-132°C.

**<sup>1</sup>H-NMR** (500 MHz, CDCl<sub>3</sub>):  $\delta$  = 8.49 (d, *J* = 8.9 Hz, 1 H, 4-H), 7.74 (d, *J* = 2.3 Hz, 1 H, 1-H), 7.56 (dd, *J* = 8.9, 2.3 Hz, 1 H, 3-H), 6.73 (t, *J* = 4.5 Hz, 1 H, 10-H), 2.86 – 2.82 (m, 2 H, 7-H), 2.64 (td, *J* = 6.4, 4.5 Hz, 2 H, 9-H), 2.08 – 2.02 (m, 2 H, 8-H) ppm.

**<sup>13</sup>C-NMR** (126 MHz, CDCl<sub>3</sub>):  $\delta$  = 182.2 (C-11), 171.5 (C-6), 147.5 (C-4a), 136.0 (C-3), 134.1 (C-10a), 130.5 (C-2), 125.0 (C-11a), 123.6 (C-1), 123.3 (C-10), 119.9 (C-4), 38.9 (C-7), 29.4 (C-9), 19.7 (C-8) ppm.

**IR:**  $\tilde{\nu}$  = 3315, 2970, 2925, 2880, 1715, 1680, 1600, 1515, 1465, 1375, 1265, 1185, 1100, 1030, 875, 800, 755 cm<sup>-1</sup>.

**HRMS** (ESI+): *m/z* calc. for C<sub>13</sub>H<sub>11</sub>ClNO<sub>2</sub><sup>+</sup> [M+H]<sup>+</sup>: 248.0478, found: 248.0485.

## 2-Methoxy-8,9-dihydro-6*H*-azepino[1,2-*a*]indole-6,11(7*H*)-dione (**3f**)

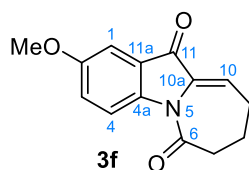

According to general procedure 1, acetate **2f** (137.0 mg, 0.45 mmol), and BNPP (15.3 mg, 45.0  $\mu$ mol) in PhCH<sub>3</sub> (3.00 mL) gave enone **3f** (colorless solid, 91.0 mg, 83%) after chromatography (silica gel, Et<sub>2</sub>O/PhCH<sub>3</sub> 1:3).

**R<sub>f</sub>** = 0.20 (silica, Et<sub>2</sub>O/PhCH<sub>3</sub> 1:3), **m.p.** = 145-151°C.

**<sup>1</sup>H-NMR** (500 MHz, CDCl<sub>3</sub>):  $\delta$  = 8.47 (d, *J* = 9.0 Hz, 1 H, 4-H), 7.26 (d, *J* = 2.9 Hz, 1 H, 1-H), 7.23 (dd, *J* = 9.0, 2.9 Hz, 1 H, 3-H), 6.72 (t, *J* = 4.5 Hz, 1 H, 10-H), 3.84 (s, 3 H, O-CH<sub>3</sub>), 2.86 – 2.81 (m, 2 H, 7-H), 2.63 (td, *J* = 6.3, 4.5 Hz, 2 H, 9-H), 2.09 – 2.03 (m, 2 H, 8-H) ppm.

**<sup>13</sup>C-NMR** (126 MHz, CDCl<sub>3</sub>):  $\delta$  = 183.5 (C-11), 171.3 (C-6), 156.9 (C-2), 144.0 (C-4a), 134.7 (C-10a), 124.9 (C-3), 124.7 (C-11a), 122.5 (C-10), 119.9 (C-4), 105.4 (C-1), 55.8 (O-CH<sub>3</sub>), 39.0 (C-7), 29.4 (C-9), 19.9 (C-8) ppm.

**IR:**  $\tilde{\nu}$  = 2965, 2940, 2845, 1725, 1680, 1655, 1490, 1450, 1440, 1380, 1320, 1285, 1245, 1130, 1060, 1035, 940, 805, 740 cm<sup>-1</sup>.

**HRMS** (ESI+): *m/z* calc. for C<sub>14</sub>H<sub>14</sub>NO<sub>3</sub><sup>+</sup> [M+H]<sup>+</sup>: 244.0974, found: 244.0977.

## 2-(*p*-Tolyl)-8,9-dihydro-6*H*-azepino[1,2-*a*]indole-6,11(7*H*)-dione (**3g**)

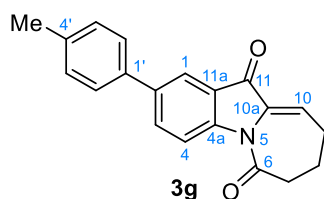

According to general procedure 1, acetate **2g** (163.0 mg, 0.45 mmol), and BNPP (15.3 mg, 45.0  $\mu$ mol) in PhCH<sub>3</sub> (3.00 mL) gave enone **3g** (colorless solid, 78.0 mg, 57%) after chromatography (silica gel, Et<sub>2</sub>O/PhCH<sub>3</sub> 1:3).

$R_f$  = 0.25 (silica, Et<sub>2</sub>O/PhCH<sub>3</sub> 1:3), **m.p.** = 129-136°C.

**<sup>1</sup>H-NMR** (500 MHz, CDCl<sub>3</sub>):  $\delta$  = 8.58 (dd,  $J$  = 8.7, 0.6 Hz, 1 H, 4-H), 8.02 (dd,  $J$  = 2.1, 0.6 Hz, 1 H, 1-H), 7.88 (dd,  $J$  = 8.7, 2.1 Hz, 1 H, 3-H), 7.51 (m<sub>c</sub>, 2 H, 2'-H), 7.26 (m<sub>c</sub>, 2 H, 3'-H), 6.75 (t,  $J$  = 4.5 Hz, 1 H, 10-H), 2.90 – 2.83 (m, 2 H, 7-H), 2.65 (td,  $J$  = 6.3, 4.5 Hz, 2 H, 9-H), 2.40 (s, 3 H, Ar-CH<sub>3</sub>), 2.13 – 2.03 (m, 2 H, 8-H) ppm.

**<sup>13</sup>C-NMR** (126 MHz, CDCl<sub>3</sub>):  $\delta$  = 183.7 (C-11), 171.7 (C-6), 148.3 (C-4a), 137.9 (C-2), 137.6 (C-4'), 136.4 (C-1'), 135.1 (C-3), 134.6 (C-10a), 129.7 (C-3'), 126.7 (C-2'), 124.3 (C-11a), 122.5 (C-10), 121.8 (C-1), 118.9 (C-4), 39.1 (C-7), 29.4 (C-9), 21.1 (Ar-CH<sub>3</sub>), 19.9 (C-8) ppm.

**IR:**  $\tilde{\nu}$  = 3035, 2935, 2870, 1725, 1685, 1655, 1620, 1485, 1375, 1345, 1310, 1265, 1195, 1130, 1065, 815, 735 cm<sup>-1</sup>.

**HRMS** (ESI+):  $m/z$  calc. for C<sub>20</sub>H<sub>18</sub>NO<sub>2</sub><sup>+</sup> [M+H]<sup>+</sup>: 303.1337, found: 303.1344.

## 2-(4-(*tert*-Butyl)phenyl)-8,9-dihydro-6*H*-azepino[1,2-*a*]indole-6,11(7*H*)-dione (**3h**)

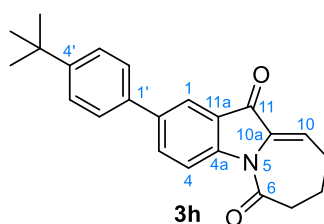

According to general procedure 1, acetate **2h** (182.0 mg, 0.45 mmol), and BNPP (15.3 mg, 45.0  $\mu$ mol) in PhCH<sub>3</sub> (3.00 mL) gave enone **3h** (colorless solid, 114.0 mg, 73%) after chromatography (silica gel, Et<sub>2</sub>O/PhCH<sub>3</sub> 1:3).

$R_f$  = 0.26 (silica, Et<sub>2</sub>O/PhCH<sub>3</sub> 1:3), **m.p.** = 194-207°C.

**<sup>1</sup>H-NMR** (500 MHz, CDCl<sub>3</sub>):  $\delta$  = 8.59 (d,  $J$  = 8.7 Hz, 1 H, 4-H), 8.05 (d,  $J$  = 2.1 Hz, 1 H, 1-H), 7.90 (dd,  $J$  = 8.7, 2.1 Hz, 1 H, 3-H), 7.56 (m<sub>c</sub>, 2 H, 2'-H), 7.48 (m<sub>c</sub>, 2 H, 3'-H), 6.76 (t,  $J$  = 4.5 Hz, 1 H, 10-H), 2.89 – 2.85 (m, 2 H, 7-H), 2.66 (td,  $J$  = 6.4, 4.5 Hz, 2 H, 9-H), 2.11 – 2.05 (m, 2 H, 8-H), 1.37 (s, 9 H, *t*-Bu) ppm.

**<sup>13</sup>C-NMR** (126 MHz, CDCl<sub>3</sub>): δ = 183.6 (C-11), 171.7 (C-6), 150.9 (C-4'), 148.4 (C-4a), 137.8 (C-2), 136.4 (C-1'), 135.2 (C-3), 134.6 (C-10a), 126.5 (C-2'), 125.9 (C-3'), 124.3 (C-11a), 122.4 (C-10), 121.8 (C-1), 118.9 (C-4), 39.1 (C-7), 34.6 (t-Bu), 31.3 (t-Bu), 29.4 (C-9), 19.9 (C-8) ppm.

**IR:**  $\tilde{\nu}$  = 2970, 2910, 2875, 1725, 1685, 1660, 1620, 1475, 1370, 1310, 1260, 1195, 1090, 1030, 800, 735 cm<sup>-1</sup>.

**HRMS** (ESI+): *m/z* calc. for C<sub>23</sub>H<sub>24</sub>NO<sub>2</sub><sup>+</sup> [M+H]<sup>+</sup>: 346.1807, found: 346.1811.



### 3 Lewis acid-catalysed oxa Diels-Alder reactions

#### General procedure 2:

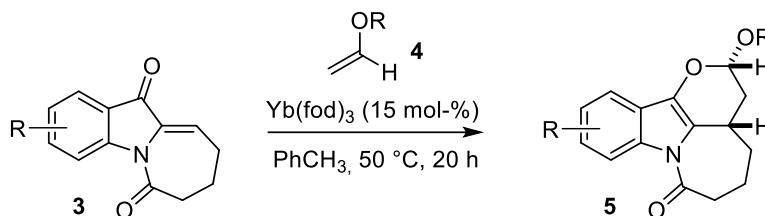

Enone **3** was dissolved in PhCH<sub>3</sub> in a 10 mL crimp cap vial. Yb(fod)<sub>3</sub> (15 mol-%) was added to the stirred solution, followed by vinyl ether **4** (10 equiv.). The vial was sealed and argon was bubbled through the mixture via cannula for 5 min. The mixture was stirred at 50°C for 20 h (heating in an oil bath). The mixture was concentrated to dryness, and the crude product was analyzed by <sup>1</sup>H-NMR spectroscopy to determine diastereomer ratio (*d.r.*). Thereafter, column chromatography over silica gel afforded the pure cycloadduct **5**.

#### Technical note:

Even though cycloadducts **5** are well-soluble in CDCl<sub>3</sub>, several derivatives showed broadened <sup>1</sup>H-NMR signals in this solvent. In these cases, use of CD<sub>3</sub>OD or CD<sub>3</sub>CN led to well-resolved <sup>1</sup>H-NMR spectra.

#### (2*S*<sup>\*</sup>,3*aS*<sup>\*</sup>)-2-Ethoxy-2,3,3*a*,4,5,6-hexahydro-7*H*-1-oxa-7*a*-azacyclohepta[*jk*]fluoren-7-one (**5aa**)

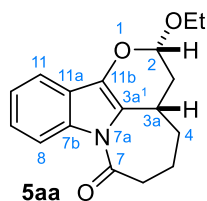

According to general procedure 2, enone **3a** (21.3 mg, 0.10 mmol), ethyl vinyl ether (**4a**, 95.0  $\mu$ L, 0.99 mmol) and Yb(fod)<sub>3</sub> (15.9 mg, 15  $\mu$ mol) in PhCH<sub>3</sub> (1.00 mL) gave compound **5aa** (colorless solid, 20.0 mg, 70%) after chromatography (silica gel, Et<sub>2</sub>O/PhCH<sub>3</sub> 1:3).

#### Reaction on 1 mmol scale:

Enone **3a** (213.0 mg, 1.00 mmol) was dissolved in PhCH<sub>3</sub> (5.00 mL) in a 10 mL crimp cap vial. Yb(fod)<sub>3</sub> (159.0 mg, 0.15 mmol) was added to the stirred solution, followed by ethyl vinyl ether (**4a**, 950.0  $\mu$ L, 9.92 mmol). The vial was sealed and argon was bubbled through the mixture via cannula for 5 min. The mixture was stirred at 50°C for 20 h (heating in an oil bath). The mixture was concentrated to dryness, and column chromatography (silica gel, Et<sub>2</sub>O/PhCH<sub>3</sub> 1:3) gave compound **5aa** (colorless solid, 227.0 mg, 79%).

$R_f = 0.32$  (silica, Et<sub>2</sub>O/heptane 1:3), **m.p.** = 125-131°C.

**<sup>1</sup>H-NMR** (500 MHz, CD<sub>3</sub>CN):  $\delta$  = 8.44 (dd,  $J$  = 8.1, 1.2 Hz, 1 H, 8-H), 7.47 (dt,  $J$  = 7.6, 1.2 Hz, 1 H, 11-H), 7.30 (ddd,  $J$  = 8.1, 7.6, 1.2 Hz, 1 H, 9-H), 7.26 (td,  $J$  = 7.6, 1.2 Hz, 1 H, 10-H), 5.34 (dd,  $J$  = 7.6, 2.1 Hz, 1 H, 2-H), 4.00 (dq,  $J$  = 9.7, 7.1 Hz, 1 H, O-CH<sub>2</sub><sup>a</sup>), 3.72 (dq,  $J$  = 9.7, 7.1 Hz, 1 H, O-CH<sub>2</sub><sup>b</sup>), 3.39 – 3.30 (m, 1 H, 3a-H), 3.04 (m<sub>c</sub>, 1 H, 6-H<sup>a</sup>), 2.67 (dt,  $J$  = 14.6, 3.7 Hz, 1 H, 6-H<sup>b</sup>), 2.23 (ddd,  $J$  = 13.6, 6.7, 2.1 Hz, 1 H, 3-H<sup>a</sup>), 2.04 – 1.88 (m, 3 H, 4-H<sup>a</sup>, 5-H<sup>a</sup>, 5-H<sup>b</sup>), 1.81 – 1.69 (m, 2 H, 3-H<sup>b</sup>, 4-H<sup>b</sup>), 1.23 (t,  $J$  = 7.1 Hz, 3 H, CH<sub>3</sub>) ppm.

**<sup>13</sup>C-NMR** (126 MHz, CD<sub>3</sub>CN):  $\delta$  = 173.6 (C-7), 136.9 (C-11b), 134.9 (C-7b), 125.8 (C-9), 124.3 (C-10), 123.4 (C-11a), 120.5 (C-3a<sup>1</sup>), 117.3 (C-11), 117.1 (C-8), 101.4 (C-2), 65.4 (O-CH<sub>2</sub>), 36.6 (C-6), 35.5 (C-3), 30.5 (C-4), 30.2 (C-3a), 21.3 (C-5), 15.6 (CH<sub>3</sub>) ppm.

**IR:**  $\tilde{\nu}$  = 3385, 2940, 1690, 1460, 1305, 1235, 1125, 985, 750 cm<sup>-1</sup>.

**HRMS** (ESI+):  $m/z$  calc. for C<sub>17</sub>H<sub>20</sub>NO<sub>3</sub><sup>+</sup> [M+H]<sup>+</sup>: 286.1443, found: 286.1446.

#### Minor diastereomer:

The minor *exo*-diastereomer could as well be isolated and characterized by NMR spectroscopy:

(2*R*\*,3*aS*\*)-2-Ethoxy-2,3,3*a*,4,5,6-hexahydro-7*H*-1-oxa-7*a*-azacyclohepta[*jk*]-fluoren-7-one (**5aa'**)

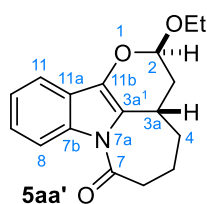

**<sup>1</sup>H-NMR** (500 MHz, CD<sub>3</sub>OD):  $\delta$  = 8.38 (dt,  $J$  = 8.2, 1.2 Hz, 1 H, 8-H), 7.44 (m<sub>c</sub>, 1 H, 11-H), 7.27 (ddd,  $J$  = 8.2, 7.3, 1.2 Hz, 1 H, 9-H), 7.23 (td,  $J$  = 7.3, 1.2 Hz, 1 H, 10-H), 5.41 (t,  $J$  = 2.5 Hz, 1 H, 2-H), 3.92 (dq,  $J$  = 9.8, 7.1 Hz, 1 H, O-CH<sub>2</sub><sup>a</sup>), 3.75 (dq,  $J$  = 9.8, 7.1 Hz, 1 H, O-CH<sub>2</sub><sup>b</sup>), 3.38 – 3.33 (m, 1 H, 3a-H), 3.13 – 3.05 (m, 1 H, 6-H<sup>a</sup>), 2.66 (dt,  $J$  = 14.0, 4.1 Hz, 1 H, 6-H<sup>b</sup>), 2.23 (ddd,  $J$  = 13.3, 6.0, 2.5 Hz, 1 H, 3-H<sup>a</sup>), 2.15 – 2.01 (m, 3 H, 4-H<sup>a</sup>, 5-H<sup>a</sup>, 5-H<sup>b</sup>), 1.66 (ddd,  $J$  = 13.3, 10.7, 2.5 Hz, 1 H, 3-H<sup>b</sup>), 1.59 – 1.50 (m, 1 H, 4-H<sup>b</sup>), 1.21 (t,  $J$  = 7.1 Hz, 3 H, CH<sub>3</sub>) ppm.

**<sup>13</sup>C-NMR** (126 MHz, CD<sub>3</sub>OD):  $\delta$  = 174.4 (C-7), 136.6 (C-11b), 135.1 (C-7b), 125.9 (C-9), 124.6 (C-10), 124.1 (C-11a), 120.7 (C-3a<sup>1</sup>), 117.4 (C-11), 117.3 (C-8), 99.2 (C-2), 65.3 (O-CH<sub>2</sub>), 37.0 (C-6), 35.6 (C-3), 31.1 (C-4), 27.8 (C-3a), 22.0 (C-5), 15.5 (CH<sub>3</sub>) ppm.

**(2*S*\*,3*aS*\*)-2-Butoxy-2,3,3*a*,4,5,6-hexahydro-7*H*-1-oxa-7*a*-azacyclohepta[*jk*]fluoren-7-one (5ab)**

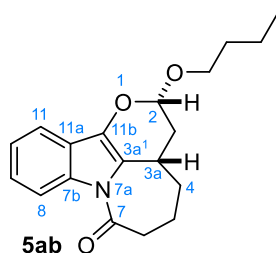

According to general procedure 2, enone **3a** (21.3 mg, 0.10 mmol), *n*-butyl vinyl ether (**4b**, 128.0  $\mu$ L, 1.00 mmol) and Yb(fod)<sub>3</sub> (15.9 mg, 15  $\mu$ mol) in PhCH<sub>3</sub> (1.00 mL) gave compound **5ab** (colorless solid, 24.0 mg, 77%) after chromatography (silica gel, Et<sub>2</sub>O/PhCH<sub>3</sub> 1:3).

**R<sub>f</sub>** = 0.35 (silica, Et<sub>2</sub>O/heptane 1:3), **m.p.** = 136-139°C.

**<sup>1</sup>H-NMR** (500 MHz, CDCl<sub>3</sub>):  $\delta$  = 8.48 (dt, *J* = 8.3, 1.0 Hz, 1 H, 8-H), 7.51 (dt, *J* = 7.6, 1.0 Hz, 1 H, 11-H), 7.32 (ddd, *J* = 8.3, 7.6, 1.0 Hz, 1 H, 9-H), 7.26 (td, *J* = 7.6, 1.0 Hz, 1 H, 10-H), 5.31 (dd, *J* = 6.9, 2.1 Hz, 1 H, 2-H), 4.00 (dt, *J* = 9.6, 6.6 Hz, 1 H, O-CH<sub>2</sub><sup>a</sup>), 3.63 (dt, *J* = 9.6, 6.6 Hz, 1 H, O-CH<sub>2</sub><sup>b</sup>), 3.28 (dtd, *J* = 11.5, 6.9, 3.5 Hz, 1 H, 3*a*-H), 3.01 – 2.92 (m, 1 H, 6-H<sup>a</sup>), 2.77 (dt, *J* = 15.1, 4.0 Hz, 1 H, 6-H<sup>b</sup>), 2.25 (ddd, *J* = 13.6, 6.9, 2.1 Hz, 1 H, 3-H<sup>a</sup>), 2.03 – 1.95 (m, 3 H, 4-H<sup>a</sup>, 5-H<sup>a</sup>, 5-H<sup>b</sup>), 1.90 (dt, *J* = 13.6, 6.9 Hz, 1 H, 3-H<sup>b</sup>), 1.87 – 1.81 (m, 1 H, 4-H<sup>b</sup>), 1.65 – 1.58 (m, 2 H, CH<sub>2</sub>), 1.39 (m<sub>c</sub>, 2 H, CH<sub>2</sub>), 0.92 (t, *J* = 7.4 Hz, 3 H, CH<sub>3</sub>) ppm.

**<sup>13</sup>C-NMR** (126 MHz, CDCl<sub>3</sub>):  $\delta$  = 172.4 (C-7), 136.7 (C-11*b*), 134.1 (C-7*b*), 125.2 (C-9), 123.4 (C-10), 122.5 (C-11*a*), 118.2 (C-3*a*<sup>1</sup>), 116.7 (C-11), 116.5 (C-8), 100.1 (C-2), 69.1 (O-CH<sub>2</sub>), 35.9 (C-6), 34.4 (C-3), 31.7 (CH<sub>2</sub>), 29.9 (C-4), 29.4 (C-3*a*), 20.6 (C-5), 19.2 (CH<sub>2</sub>), 13.8 (CH<sub>3</sub>) ppm.

**IR:**  $\tilde{\nu}$  = 3360, 2945, 1735, 1655, 1470, 1380, 1305, 765 cm<sup>-1</sup>.

**HRMS** (ESI<sup>+</sup>): *m/z* calc. for C<sub>19</sub>H<sub>24</sub>NO<sub>3</sub><sup>+</sup> [M+H]<sup>+</sup>: 314.1756, found: 314.1760.

**(2*S*\*,3*aS*\*)-2-(*tert*-Butoxy)-2,3,3*a*,4,5,6-hexahydro-7*H*-1-oxa-7*a*-azacyclohepta[*jk*]fluoren-7-one (5ac)**

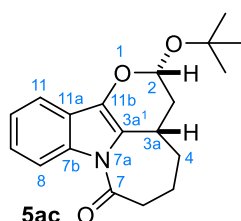

According to general procedure 2, enone **3a** (21.3 mg, 0.10 mmol), *tert*-butyl vinyl ether (**4c**, 131.0  $\mu$ L, 1.00 mmol) and Yb(fod)<sub>3</sub> (15.9 mg, 15  $\mu$ mol) in PhCH<sub>3</sub> (1.00 mL) gave compound **5ac** (colorless solid, 28.0 mg, 89%) after chromatography (silica gel, Et<sub>2</sub>O/PhCH<sub>3</sub> 1:3).

$R_f$  = 0.34 (silica, Et<sub>2</sub>O/heptane 1:3), **m.p.** = 110°C.

**<sup>1</sup>H-NMR** (500 MHz, CD<sub>3</sub>CN): δ = 8.44 (dt,  $J$  = 8.2, 1.1 Hz, 1 H, 8-H), 7.44 (dt,  $J$  = 7.6, 1.1 Hz, 1 H, 11-H), 7.30 (ddd,  $J$  = 8.2, 7.6, 1.1 Hz, 1 H, 9-H), 7.25 (td,  $J$  = 7.6, 1.1 Hz, 1 H, 10-H), 5.59 (dd,  $J$  = 7.8, 2.1 Hz, 1 H, 2-H), 3.42 – 3.35 (m, 1 H, 3a-H), 3.08 – 3.00 (m, 1 H, 6-H<sup>a</sup>), 2.68 (dt,  $J$  = 14.4, 3.8 Hz, 1 H, 6-H<sup>b</sup>), 2.14 (ddd,  $J$  = 13.5, 6.6, 2.1 Hz, 1 H, 3-H<sup>a</sup>), 2.04 – 1.90 (m, 3 H, 4-H<sup>a</sup>, 5-H<sup>a</sup>, 5-H<sup>b</sup>), 1.78 – 1.69 (m, 2 H, 3-H<sup>b</sup>, 4-H<sup>b</sup>), 1.32 (s, 3 H, <sup>t</sup>Bu) ppm.

**<sup>13</sup>C-NMR** (126 MHz, CD<sub>3</sub>CN): δ = 173.6 (C-7), 137.4 (C-11b), 134.9 (C-7b), 125.7 (C-9), 124.2 (C-10), 123.6 (C-11a), 120.3 (C-3a<sup>1</sup>), 117.3 (C-11), 117.1 (C-8), 96.3 (C-2), 76.4 (O-<sup>t</sup>Bu), 36.9 (C-3), 36.6 (C-6), 30.6 (C-4), 30.5 (C-3a), 28.9 (<sup>t</sup>Bu), 21.3 (C-5) ppm.

**IR:**  $\tilde{\nu}$  = 3375, 2975, 2930, 2875, 1730, 1685, 1465, 1380, 1345, 1260, 1185, 1155, 1120, 935, 760 cm<sup>-1</sup>.

**HRMS** (ESI+):  $m/z$  calc. for C<sub>19</sub>H<sub>24</sub>NO<sub>3</sub><sup>+</sup> [M+H]<sup>+</sup>: 314.1756, found: 314.1758.

### (2S\*,3aS\*)-2-Isobutoxy-2,3,3a,4,5,6-hexahydro-7H-1-oxa-7a-azacyclohepta[*jk*]-fluoren-7-one (5ad)

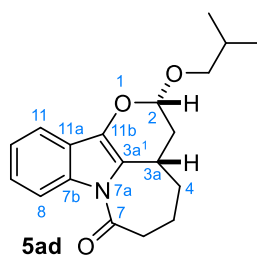

According to general procedure 2, enone **3a** (21.3 mg, 0.10 mmol), isobutyl vinyl ether (**4d**, 130.0 μL, 1.00 mmol) and Yb(fod)<sub>3</sub> (15.9 mg, 15 μmol) in PhCH<sub>3</sub> (1.00 mL) gave compound **5ad** (colorless solid, 26.0 mg, 83%) after chromatography (silica gel, Et<sub>2</sub>O/PhCH<sub>3</sub> 1:3).

$R_f$  = 0.59 (silica, Et<sub>2</sub>O/PhCH<sub>3</sub> 1:3), **m.p.** = 87-96°C.

**<sup>1</sup>H-NMR** (500 MHz, CD<sub>3</sub>CN): δ = 8.40 (dt,  $J$  = 8.2, 0.8 Hz, 1 H, 8-H), 7.46 (dt,  $J$  = 7.4, 0.8 Hz, 1 H, 11-H), 7.30 (ddd,  $J$  = 8.4, 7.4, 0.8 Hz, 1 H, 9-H), 7.26 (td,  $J$  = 7.4, 0.8 Hz, 1 H, 10-H), 5.33 (dd,  $J$  = 6.5, 2.2 Hz, 1 H, 2-H), 3.71 (dd,  $J$  = 9.4, 6.6 Hz, 1 H, O-CH<sub>2</sub><sup>a</sup>), 3.42 (dd,  $J$  = 9.4, 6.6 Hz, 1 H, O-CH<sub>2</sub><sup>b</sup>), 3.35 (m<sub>c</sub>, 1H, 3a-H), 3.06 – 2.98 (m, 1 H, 6-H<sup>a</sup>), 2.68 – 2.62 (m, 1 H, 6-H<sup>b</sup>), 2.24 (ddd,  $J$  = 13.7, 6.9, 2.2 Hz, 1 H, 3-H<sup>a</sup>), 2.00 – 1.96 (m, 2 H, 4-H<sup>a</sup>, 5-H<sup>a</sup>), 1.89 – 1.80 (m, 4 H, 3-H<sup>b</sup>, 4-H<sup>b</sup>, 5-H<sup>b</sup>, CH), 0.89 (d,  $J$  = 6.7 Hz, 3 H, CH<sub>3</sub>), 0.88 (d,  $J$  = 6.7 Hz, 3 H, CH<sub>3</sub>), ppm.

**<sup>13</sup>C-NMR** (126 MHz, CD<sub>3</sub>CN): δ = 173.6 (C-7), 136.6 (C-11b), 134.8 (C-7b), 125.7 (C-9), 124.2 (C-10), 123.4 (C-11a), 120.3 (C-3a<sup>1</sup>), 117.2 (C-11), 117.0 (C-8), 101.3 (C-2), 76.4 (O-CH<sub>2</sub>), 36.5 (C-6), 34.8 (C-3), 30.5 (C-4), 29.7 (C-3a), 29.3 (CH), 21.3 (C-5), 19.4 (2 × CH<sub>3</sub>) ppm.

**IR:**  $\tilde{\nu}$  = 3290, 2965, 2935, 2875, 1725, 1675, 1610, 1465, 1385, 1310, 1260, 1185, 920, 750, 670 cm<sup>-1</sup>.

**HRMS** (ESI+):  $m/z$  calc. for C<sub>19</sub>H<sub>24</sub>NO<sub>3</sub><sup>+</sup> [M+H]<sup>+</sup>: 314.1756, found: 314.1755.

**(2*S*\*,3*aS*\*)-2-Ethoxy-10-methyl-2,3,3*a*,4,5,6-hexahydro-7*H*-1-oxa-7*a*-azacyclohepta[*jk*]-fluoren-7-one (5*ba*)**

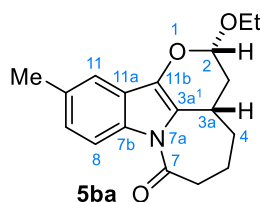

According to general procedure 2, enone **3b** (22.7 mg, 0.10 mmol), ethyl vinyl ether (**4a**, 95.0  $\mu$ L, 0.99 mmol) and Yb(fod)<sub>3</sub> (15.9 mg, 15  $\mu$ mol) in PhCH<sub>3</sub> (1.00 mL) gave compound **5ba** (colorless solid, 25.0 mg, 84%) after chromatography (silica gel, Et<sub>2</sub>O/PhCH<sub>3</sub> 1:3).

*R<sub>f</sub>* = 0.61 (silica, Et<sub>2</sub>O/PhCH<sub>3</sub> 1:3), *m.p.* = 107-109°C.

**<sup>1</sup>H-NMR** (300 MHz, CD<sub>3</sub>OD):  $\delta$  = 8.22 (d, *J* = 8.5 Hz, 1 H, 8-H), 7.24 – 7.19 (m, 1 H, 11-H), 7.11 – 7.05 (m, 1 H, 9-H), 5.31 (dd, *J* = 7.1, 2.1 Hz, 1 H, 2-H), 4.01 (dq, *J* = 9.6, 7.1 Hz, 1 H, O-CH<sub>2</sub><sup>a</sup>), 3.74 (dq, *J* = 9.6, 7.1 Hz, 1 H, O-CH<sub>2</sub><sup>b</sup>), 3.35 – 3.24 (m, 1 H, 3*a*-H), 3.10 – 2.97 (m, 1 H, 6-H<sup>a</sup>), 2.67 – 2.57 (m, 1 H, 6-H<sup>b</sup>), 2.40 (s, 3 H, Ar-CH<sub>3</sub>), 2.22 (ddd, *J* = 13.6, 6.8, 2.1 Hz, 1 H, 3-H<sup>a</sup>), 2.05 – 1.90 (m, 3 H, 4-H<sup>a</sup>, 5-H<sup>a</sup>, 5-H<sup>b</sup>), 1.82 – 1.68 (m, 2 H, 3-H<sup>b</sup>, 4-H<sup>b</sup>), 1.25 (t, *J* = 7.1 Hz, 3 H, CH<sub>3</sub>) ppm.

**<sup>13</sup>C-NMR** (75 MHz, CD<sub>3</sub>OD):  $\delta$  = 174.4 (C-7), 137.7 (C-11*b*), 134.4 (C-10), 133.6 (C-7*b*), 127.2 (C-9), 124.2 (C-11*a*), 120.2 (C-3*a*<sup>1</sup>), 117.4 (C-11), 117.1 (C-8), 101.6 (C-2), 65.8 (O-CH<sub>2</sub>), 36.5 (C-6), 35.7 (C-3), 31.0 (C-4), 30.4 (C-3*a*), 21.7 (C-5), 21.4 (Ar-CH<sub>3</sub>), 15.6 (CH<sub>3</sub>) ppm.

**IR:**  $\tilde{\nu}$  = 3335, 2935, 2875, 1725, 1685, 1490, 1460, 1380, 1320, 1170, 1135, 1065, 990, 815 cm<sup>-1</sup>.

**HRMS** (ESI+): *m/z* calc. for C<sub>18</sub>H<sub>22</sub>NO<sub>3</sub><sup>+</sup> [M+H]<sup>+</sup>: 300.1600, found: 300.1607.

**(2*S*\*,3*aS*\*)-2-Ethoxy-10-fluoro-2,3,3*a*,4,5,6-hexahydro-7*H*-1-oxa-7*a*-azacyclohepta[*jk*]-fluoren-7-one (5*ca*)**

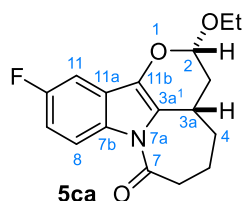

According to general procedure 2, enone **3c** (23.1 mg, 0.10 mmol), ethyl vinyl ether (**4a**, 95.0  $\mu$ L, 0.99 mmol) and Yb(fod)<sub>3</sub> (15.9 mg, 15  $\mu$ mol) in PhCH<sub>3</sub> (1.00 mL) gave compound **5ca** (colorless solid, 28.0 mg, 92%) after chromatography (silica gel, Et<sub>2</sub>O/PhCH<sub>3</sub> 1:3).

*R<sub>f</sub>* = 0.26 (silica, Et<sub>2</sub>O/heptane 1:3), *m.p.* = 112-117°C.

**<sup>1</sup>H-NMR** (300 MHz, CDCl<sub>3</sub>): δ = 8.42 (ddd,  $J_{H,H} = 9.1, 0.5$  Hz,  $J_{F,H} = 4.7$  Hz, 1 H, 8-H), 7.15 (ddt,  $J_{H,H} = 2.7, 0.5$  Hz,  $J_{F,H} = 9.1$  Hz, 1 H, 11-H), 7.01 (td,  $J_{H,H} = 9.1, 2.7$  Hz,  $J_{F,H} = 9.1$  Hz, 1 H, 9-H), 5.30 (dd,  $J = 7.0, 2.1$  Hz, 1 H, 2-H), 4.04 (dq,  $J = 9.6, 7.1$  Hz, 1H, O-CH<sub>2</sub><sup>a</sup>), 3.70 (dq,  $J = 9.6, 7.1$  Hz, 1 H, O-CH<sub>2</sub><sup>b</sup>), 3.26 (m<sub>c</sub>, 1 H, 3a-H), 3.01 – 2.86 (m, 1 H, 6-H<sup>a</sup>), 2.76 (dt,  $J = 15.0, 4.3$  Hz, 1 H, 6-H<sup>b</sup>), 2.26 (ddd,  $J = 13.6, 6.8, 2.1$  Hz, 1 H, 3-H<sup>a</sup>), 2.06 – 1.94 (m, 3 H, 4-H<sup>a</sup>, 5-H<sup>a</sup>, 5-H<sup>b</sup>), 1.93 – 1.79 (m, 2 H, 3-H<sup>b</sup>, 4-H<sup>b</sup>), 1.27 (t,  $J = 7.1$  Hz, 3 H, CH<sub>3</sub>) ppm.

**<sup>13</sup>C-NMR** (75 MHz, CDCl<sub>3</sub>): δ = 172.1 (C-7), 159.5 (d,  $J_{C,F} = 240.7$  Hz, C-10), 136.3 (d,  $J_{C,F} = 3.9$  Hz, C-11b), 130.3 (d,  $J_{C,F} = 1.1$  Hz, C-7b), 123.4 (d,  $J_{C,F} = 10.1$  Hz, C-11a), 120.0 (C-3a<sup>1</sup>), 117.7 (d,  $J_{C,F} = 8.9$  Hz, C-8), 112.6 (d,  $J_{C,F} = 24.7$  Hz, C-9), 102.6 (d,  $J_{C,F} = 24.7$  Hz, C-11), 100.0 (C-2), 64.8 (O-CH<sub>2</sub>), 35.7 (C-6), 34.5 (C-3), 29.8 (C-4), 29.5 (C-3a), 20.5 (C-5), 15.2 (CH<sub>3</sub>) ppm.

**<sup>19</sup>F-NMR** (282 MHz, CDCl<sub>3</sub>): δ = -118.93 ppm.

**IR:**  $\tilde{\nu} = 3335, 2950, 2880, 1735, 1680, 1485, 1380, 1270, 840, 760$  cm<sup>-1</sup>.

**HRMS** (ESI+):  $m/z$  calc. for C<sub>17</sub>H<sub>19</sub>FNO<sub>3</sub><sup>+</sup> [M+H]<sup>+</sup>: 304.1349, found: 304.1356.

**(2S\*,3aS\*)-10-Bromo-2-ethoxy-2,3,3a,4,5,6-hexahydro-7H-1-oxa-7a-azacyclohepta[jk]-fluoren-7-one (5da)**

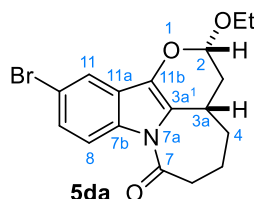

According to general procedure 2, enone **3d** (29.0 mg, 0.10 mmol), ethyl vinyl ether (**4a**, 95.0 μL, 0.99 mmol) and Yb(fod)<sub>3</sub> (15.9 mg, 15 μmol) in PhCH<sub>3</sub> (1.00 mL) gave compound **5da** (colorless solid, 23.0 mg, 63%) after chromatography (silica gel, Et<sub>2</sub>O/PhCH<sub>3</sub> 1:3).

**R<sub>f</sub>** = 0.28 (silica, Et<sub>2</sub>O/heptane 1:3), **m.p.** = 99-104°C.

**<sup>1</sup>H-NMR** (300 MHz, CD<sub>3</sub>OD): δ = 8.27 (dd,  $J = 8.8, 0.5$  Hz, 1 H, 8-H), 7.54 (dd,  $J = 2.0, 0.5$  Hz, 1 H, 11-H), 7.36 (dd,  $J = 8.8, 2.0$  Hz, 1 H, 9-H), 5.35 (dd,  $J = 6.8, 2.1$  Hz, 1 H, 2-H), 4.01 (dq,  $J = 9.6, 7.1$  Hz, 1 H, O-CH<sub>2</sub><sup>a</sup>), 3.72 (dq,  $J = 9.6, 7.1$  Hz, 1 H, O-CH<sub>2</sub><sup>b</sup>), 3.36 (m<sub>c</sub>, 1 H, 3a-H), 3.13 – 3.00 (m, 1 H, 6-H<sup>a</sup>), 2.73 – 2.64 (m, 1 H, 6-H<sup>b</sup>), 2.26 (ddd,  $J = 13.7, 6.8, 2.1$  Hz, 1 H, 3-H<sup>a</sup>), 2.08 – 1.93 (m, 2 H, 4-H<sup>a</sup>, 5-H<sup>a</sup>), 1.89 – 1.75 (m, 3 H, 3-H<sup>b</sup>, 4-H<sup>b</sup>, 5-H<sup>b</sup>), 1.24 (t,  $J = 7.1$  Hz, 3 H, CH<sub>3</sub>) ppm.

**<sup>13</sup>C-NMR** (75 MHz, CD<sub>3</sub>OD): δ = 174.4 (C-7), 136.5 (C-11b), 133.9 (C-7b), 128.6 (C-9), 125.6 (C-11a), 121.9 (C-3a<sup>1</sup>), 120.2 (C-11), 118.9 (C-8), 117.5 (C-10), 101.6 (C-2), 65.8 (O-CH<sub>2</sub>), 36.5 (C-6), 35.4 (C-3), 30.9 (C-4), 30.3 (C-3a), 21.6 (C-5), 15.6 (CH<sub>3</sub>) ppm.

**IR:**  $\tilde{\nu} = 3325, 2940, 2880, 1735, 1680, 1465, 1375, 1340, 1315, 1270, 1185, 1120, 980, 840, 755$  cm<sup>-1</sup>.

**HRMS** (ESI+):  $m/z$  calc. for C<sub>17</sub>H<sub>19</sub><sup>79</sup>BrNO<sub>3</sub><sup>+</sup> [M+H]<sup>+</sup>: 364.0548, found: 364.0550.

**(2*S*\*,3*aS*\*)-10-Chloro-2-ethoxy-2,3,3*a*,4,5,6-hexahydro-7*H*-1-oxa-7*a*-azacyclohepta[*jk*]-fluoren-7-one (5ea)**

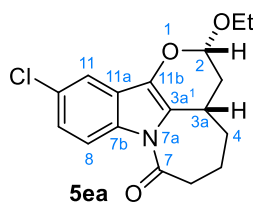

According to general procedure 2, enone **3e** (24.7 mg, 0.10 mmol), ethyl vinyl ether (**4a**, 95.0  $\mu$ L, 0.99 mmol) and Yb(fod)<sub>3</sub> (15.9 mg, 15  $\mu$ mol) in PhCH<sub>3</sub> (1.00 mL) gave compound **5ea** (colorless solid, 21.0 mg, 66%) after chromatography (silica gel, Et<sub>2</sub>O/PhCH<sub>3</sub> 1:3).

R<sub>f</sub> = 0.28 (silica, Et<sub>2</sub>O/heptane 1:3), m.p. = 89-95°C.

<sup>1</sup>H-NMR (500 MHz, CDCl<sub>3</sub>):  $\delta$  = 8.69 (br. s, 1 H, 8-H), 7.51 (d, *J* = 2.2 Hz, 1 H, 11-H), 7.26 (dd, *J* = 8.8, 2.1 Hz, 1 H, 9-H), 5.35 (dd, *J* = 6.9, 2.1 Hz, 1 H, 2-H), 4.07 (dq, *J* = 9.6, 7.1 Hz, 1 H, O-CH<sub>2</sub><sup>a</sup>), 3.72 (dq, *J* = 9.6, 7.1 Hz, 1 H, O-CH<sub>2</sub><sup>b</sup>), 3.40 – 3.32 (m, 1 H, 3*a*-H), 3.19 – 3.00 (m, 2 H, 6-H<sup>a</sup>, 6-H<sup>b</sup>), 2.30 (ddd, *J* = 13.7, 6.8, 2.1 Hz, 1 H, 3-H<sup>a</sup>), 2.14 – 2.00 (m, 3 H, 4-H<sup>a</sup>, 5-H<sup>a</sup>, 5-H<sup>b</sup>), 1.98 – 1.89 (m, 2 H, 3-H<sup>b</sup>, 4-H<sup>b</sup>), 1.29 (t, *J* = 7.1 Hz, 3 H, CH<sub>3</sub>) ppm.

<sup>13</sup>C-NMR (126 MHz, CDCl<sub>3</sub>):  $\delta$  = 173.1 (C-7), 136.0 (C-11b), 132.6 (C-7b), 129.1 (C-10), 125.2 (C-9), 123.8 (C-11a), 119.9 (C-3*a*<sup>1</sup>), 117.8 (C-8), 116.6 (C-11), 100.0 (C-2), 64.9 (O-CH<sub>2</sub>), 36.1 (C-6), 34.5 (C-3), 29.9 (C-4), 29.6 (C-3*a*), 20.6 (C-5), 15.2 (CH<sub>3</sub>) ppm.

IR:  $\tilde{\nu}$  = 3325, 2940, 2880, 1735, 1680, 1465, 1375, 1340, 1315, 1270, 1185, 1120, 980, 840, 755 cm<sup>-1</sup>.

HRMS (ESI<sup>+</sup>): *m/z* calc. for C<sub>17</sub>H<sub>19</sub>ClNO<sub>3</sub><sup>+</sup> [M+H]<sup>+</sup>: 320.1053, found: 320.1060.

**(2*S*\*,3*aS*\*)-2-Ethoxy-10-methoxy-2,3,3*a*,4,5,6-hexahydro-7*H*-1-oxa-7*a*-azacyclohepta[*jk*]-fluoren-7-one (5fa)**

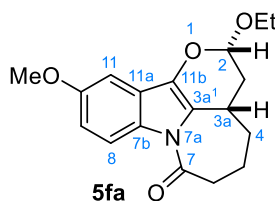

According to general procedure 2, enone **3f** (24.3 mg, 0.10 mmol), ethyl vinyl ether (**4a**, 95.0  $\mu$ L, 0.99 mmol) and Yb(fod)<sub>3</sub> (15.9 mg, 15  $\mu$ mol) in PhCH<sub>3</sub> (1.00 mL) gave compound **5fa** (colorless solid, 24.1 mg, 76%) after chromatography (silica gel, Et<sub>2</sub>O/PhCH<sub>3</sub> 1:3).

R<sub>f</sub> = 0.26 (silica, Et<sub>2</sub>O/heptane 1:3), m.p. = 211-214°C.

**<sup>1</sup>H-NMR** (300 MHz, CDCl<sub>3</sub>): δ = 8.41 (d, *J* = 9.0 Hz, 1 H, 8-H), 6.96 (d, *J* = 2.6 Hz, 1 H, 11-H), 6.90 (dd, *J* = 9.0, 2.6 Hz, 1 H, 9-H), 5.31 (dd, *J* = 7.2, 2.1 Hz, 1 H, 2-H), 4.08 (dq, *J* = 9.5, 7.1 Hz, 1 H, O-CH<sub>2</sub><sup>a</sup>), 3.85 (s, 3 H, O-CH<sub>3</sub>), 3.71 (dq, *J* = 9.6, 7.1 Hz, 1 H, O-CH<sub>2</sub><sup>b</sup>), 3.27 (m<sub>c</sub>, 1 H, 3a-H), 3.03 – 2.89 (m, 1 H, 6-H<sup>a</sup>), 2.80 (dt, *J* = 14.7, 3.8 Hz, 1 H, 6-H<sup>b</sup>), 2.26 (ddd, *J* = 13.7, 6.8, 2.1 Hz, 1 H, 3-H<sup>a</sup>), 2.06 – 1.94 (m, 3 H, 4-H<sup>a</sup>, 5-H<sup>a</sup>, 5-H<sup>b</sup>), 1.94 – 1.77 (m, 2 H, 3-H<sup>b</sup>, 4-H<sup>b</sup>), 1.29 (t, *J* = 7.1 Hz, 3 H, CH<sub>3</sub>) ppm.

**<sup>13</sup>C-NMR** (75 MHz, CDCl<sub>3</sub>): δ = 172.1 (C-7), 156.4 (C-10), 136.7 (C-11b), 128.8 (C-7b), 123.3 (C-11a), 119.0 (C-3a<sup>1</sup>), 117.6 (C-8), 113.6 (C-9), 100.1 (C-2), 99.4 (C-11), 64.8 (O-CH<sub>2</sub>), 55.7 (O-CH<sub>3</sub>), 35.7 (C-6), 34.7 (C-3), 29.9 (C-4), 29.6 (C-3a), 20.5 (C-5), 15.2 (CH<sub>3</sub>) ppm.

**IR:**  $\tilde{\nu}$  = 3380, 2980, 2850, 1730, 1680, 1490, 1460, 1340, 1380, 1330, 1260, 1190, 1120, 1040, 920, 845, 745 cm<sup>-1</sup>.

**HRMS** (ESI+): *m/z* calc. for C<sub>18</sub>H<sub>22</sub>NO<sub>4</sub><sup>+</sup> [M+H]<sup>+</sup>: 316.1549, found: 316.1550.

**(2S\*,3aS\*)-2-Ethoxy-10-(*p*-tolyl)-2,3,3a,4,5,6-hexahydro-7H-1-oxa-7a-azacyclohepta[*j*]*k*-fluorene-7-one (5ga)**

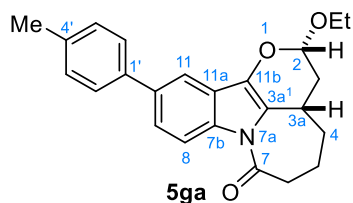

According to general procedure 2, enone **3g** (30.0 mg, 0.10 mmol), ethyl vinyl ether (**4a**, 95.0  $\mu$ L, 0.99 mmol) and Yb(fod)<sub>3</sub> (15.9 mg, 15  $\mu$ mol) in PhCH<sub>3</sub> (1.00 mL) gave compound **5ga** (colorless solid, 32.5 mg, 87%) after chromatography (silica gel, Et<sub>2</sub>O/PhCH<sub>3</sub> 1:3).

**R<sub>f</sub>** = 0.48 (silica, Et<sub>2</sub>O/toluene 1:3), **m.p.** = 92-96°C.

**<sup>1</sup>H-NMR** (300 MHz, CD<sub>3</sub>OD): δ = 8.41 (br. d, *J* = 8.6 Hz, 1 H, 8-H), 7.62 (m<sub>c</sub>, 1 H, 11-H), 7.57 – 7.49 (m, 3 H, 9-H, 2'-H), 7.25 (d, *J* = 7.9 Hz, 2 H, 3'-H), 5.38 (dd, *J* = 7.1, 1.9 Hz, 1 H, 2-H), 4.05 (dq, *J* = 9.6, 7.1 Hz, 1H, O-CH<sub>2</sub><sup>a</sup>), 3.73 (dq, *J* = 9.6, 7.1 Hz, 1 H, O-CH<sub>2</sub><sup>b</sup>), 3.44 – 3.35 (m, 1 H, 3a-H), 3.17 – 3.02 (m, 1 H, 6-H<sup>a</sup>), 2.73 – 2.62 (m, 1 H, 6-H<sup>b</sup>), 2.37 (s, 3 H, Ar-CH<sub>3</sub>), 2.29 (ddd, *J* = 13.7, 6.8, 1.9 Hz, 1 H, 3-H<sup>a</sup>), 2.10 – 1.90 (m, 3 H, 4-H<sup>a</sup>, 5-H<sup>a</sup>, 5-H<sup>b</sup>), 1.90 – 1.73 (m, 2 H, 3-H<sup>b</sup>, 4-H<sup>b</sup>), 1.26 (t, *J* = 7.1 Hz, 3 H, CH<sub>3</sub>) ppm.

**<sup>13</sup>C-NMR** (75 MHz, CD<sub>3</sub>OD): δ = 174.5 (C-7), 139.7 (C-1'), 138.2 (C-11b), 137.93 (C-10), 137.91 (C-4'), 134.6 (C-7b), 130.5 (C-3'), 128.0 (C-2'), 125.1 (C-9), 124.6 (C-11a), 120.8 (C-3a<sup>1</sup>), 117.6 (C-8), 115.4 (C-11), 101.7 (C-2), 65.8 (O-CH<sub>2</sub>), 36.5 (C-6), 35.8 (C-3), 31.0 (C-4), 30.5 (C-3a), 21.7 (C-5), 21.1 (Ar-CH<sub>3</sub>), 15.6 (CH<sub>3</sub>) ppm.

**IR:**  $\tilde{\nu}$  = 3285, 2960, 2930, 2880, 1725, 1685, 1655, 1620, 1590, 1480, 1370, 1335, 1310, 1265, 1130, 1005, 810, 745 cm<sup>-1</sup>.

**HRMS** (ESI+): *m/z* calc. for C<sub>24</sub>H<sub>26</sub>NO<sub>3</sub><sup>+</sup> [M+H]<sup>+</sup>: 376.1913, found: 376.1913.



**(2*S*\*,3*aS*\*)-10-(4-(*tert*-Butyl)phenyl)-2-ethoxy-2,3,3*a*,4,5,6-hexahydro-7*H*-1-oxa-7*a*-azacyclohepta[*jk*]-fluoren-7-one (5*ha*)**

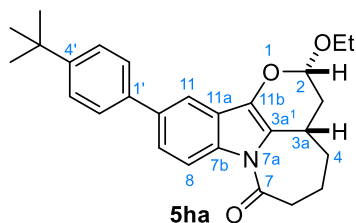

According to general procedure 2, enone **3h** (34.0 mg, 0.10 mmol), ethyl vinyl ether (**4a**, 95.0  $\mu$ L, 0.99 mmol) and Yb(fod)<sub>3</sub> (15.9 mg, 15  $\mu$ mol) in PhCH<sub>3</sub> (1.00 mL) gave compound **5ha** (colorless solid, 37.0 mg, 89%) after chromatography (silica gel, Et<sub>2</sub>O/PhCH<sub>3</sub> 1:3).

$R_f$  = 0.47 (silica, Et<sub>2</sub>O/PhCH<sub>3</sub> 1:3), **m.p.** = 87-94°C.

**<sup>1</sup>H-NMR** (500 MHz, CDCl<sub>3</sub>):  $\delta$  = 10.82 – 9.81 (br. m, 1 H, 8-H), 8.00 (br. s, 1 H, 11-H), 7.66 (m<sub>c</sub>, 2 H, 2'-H), 7.63 (br. d,  $J$  = 7.1 Hz, 1 H, 9-H), 7.48 (m<sub>c</sub>, 2 H, 3'-H), 5.66 – 5.57 (m, 1 H, 2-H), 4.31 – 4.22 (m, 1H, O-CH<sub>2</sub><sup>a</sup>), 3.93 – 3.84 (m, 1 H, O-CH<sub>2</sub><sup>b</sup>), 3.22 – 3.00 (br. m, 1 H, 3a-H), 2.89 – 2.69 (br. m, 1 H, 5-H<sup>a</sup>), 2.61 – 2.53 (m, 1 H, 3-H<sup>a</sup>), 2.49 – 2.30 (m, 3 H, 4-H<sup>a</sup>, 4-H<sup>b</sup>, 5-H<sup>b</sup>), 2.28 – 2.17 (m, 1 H, 3-H<sup>b</sup>), 1.41 (t,  $J$  = 7.0 Hz, 3 H, CH<sub>3</sub>), 1.37 (s, 9 H, *t*-Bu) ppm.

Due to signal broadening, the signals of 6-H<sup>a</sup> and 6-H<sup>b</sup> could not be identified unambiguously.

**<sup>13</sup>C-NMR** (126 MHz, CDCl<sub>3</sub>):  $\delta$  = 171.1 (C-7), 150.0 (C-4'), 138.6 (C-1'), 137.6 (C-11b), 137.0 (C-10), 135.0 (C-7b), 127.0 (C-2'), 125.7 (C-3'), 124.9 (C-9), 123.8 (C-11a), 119.9 (C-3a'), 118.0 (C-8), 115.3 (C-11), 100.4 (C-2), 65.0 (O-CH<sub>2</sub>), 38.1 (C-6), 35.0 (C-3), 34.5 (*t*-Bu), 31.4 (*t*-Bu), 30.5 (C-3a), 30.3 (C-4), 21.5 (C-5), 15.3 (CH<sub>3</sub>) ppm.

**IR:**  $\tilde{\nu}$  = 3285, 2960, 2930, 2880, 1725, 1685, 1655, 1620, 1590, 1480, 1370, 1335, 1310, 1265, 1130, 1005, 810, 745 cm<sup>-1</sup>.

**HRMS** (ESI+):  $m/z$  calc. for C<sub>27</sub>H<sub>32</sub>NO<sub>3</sub><sup>+</sup> [M+H]<sup>+</sup>: 418.2382, found: 418.2386.

## 4 Additional synthetic experiments

Cu(OTf)<sub>2</sub>-catalysed reaction of acetate **2a** with ethyl vinyl ether (**4a**):

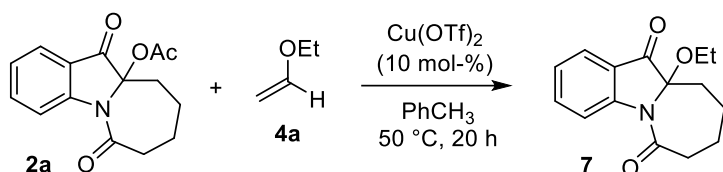

Azepinoindole acetate **2a** (27.3 mg, 0.10 mmol) was dissolved in PhCH<sub>3</sub> (1.00 mL) in a 10 mL crimp cap vial. Cu(OTf)<sub>2</sub> (3.6 mg, 10.0 μmol) was added followed by ethyl vinyl ether (**4a**, 95.0 μL, 0.99 mmol). The vial was sealed and argon was bubbled through the mixture via cannula for 5 min. The mixture was stirred at 50°C for 20 h (heating in an oil bath). The mixture was concentrated to dryness and column chromatography (silica gel, Et<sub>2</sub>O/PhCH<sub>3</sub> 1:3) afforded product **7** (23.0 mg, 90%).

### 10a-Ethoxy-8,9,10,10a-tetrahydro-6H-azepino[1,2-a]indole-6,11(7H)-dione (**7**)

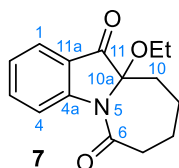

R<sub>f</sub> = 0.27 (silica, Et<sub>2</sub>O/PhCH<sub>3</sub> 1:3), m.p. = 155-157°C.

<sup>1</sup>H-NMR (500 MHz, CDCl<sub>3</sub>): δ = 8.62 (dt, *J* = 8.4, 0.6 Hz, 1 H, 4-H), 7.75 (ddd, *J* = 7.6, 1.4, 0.6 Hz, 1 H, 1-H), 7.70 (ddd, *J* = 8.4, 7.6, 1.4 Hz, 1 H, 3-H), 7.21 (td, *J* = 7.6, 0.6 Hz, 1 H, 2-H), 3.28 (dq, *J* = 10.3, 7.1 Hz, 2 H, O-CH<sub>2</sub><sup>a</sup>, OCH<sub>2</sub><sup>b</sup>), 3.06 (td, *J* = 13.8, 1.8 Hz, 1 H, 7-H<sup>a</sup>), 2.64 (ddt, *J* = 13.8, 7.3, 1.2 Hz, 1 H, 7-H<sup>b</sup>), 2.33 (dtd, *J* = 14.2, 4.0, 1.2 Hz, 1 H, 10-H<sup>a</sup>), 2.21 (qt, *J* = 13.6, 4.0 Hz, 1 H, 9-H<sup>a</sup>), 2.03-1.95 (m, 1 H, 8-H<sup>a</sup>), 1.82 (m<sub>c</sub>, 1 H, 9-H<sup>b</sup>), 1.62 (m<sub>c</sub>, 1 H, 8-H<sup>b</sup>), 1.48 (ddd, *J* = 14.2, 13.6, 4.0 Hz, 1 H, 10-H<sup>b</sup>), 1.19 (t, *J* = 7.1 Hz, 3 H, CH<sub>3</sub>) ppm.

<sup>13</sup>C-NMR (126 MHz, CDCl<sub>3</sub>): δ = 198.3 (C-11), 173.4 (C-6), 152.6 (C-4a), 138.2 (C-3), 124.3 (C-2), 123.9 (C-1), 121.6 (C-11a), 118.5 (C-4), 92.6 (C-10a), 59.6 (O-CH<sub>2</sub>), 38.1 (C-7), 35.2 (C-10), 24.1 (C-8), 22.8 (C-9), 15.0 (CH<sub>3</sub>) ppm.

IR:  $\tilde{\nu}$  = 2985, 2950, 1730, 1670, 1605, 1465, 1385, 1340, 1305, 1080, 1060, 1045, 760, 705 cm<sup>-1</sup>.

HRMS (ESI+): *m/z* calc. for C<sub>15</sub>H<sub>18</sub>NO<sub>3</sub><sup>+</sup> [M+H]<sup>+</sup>: 260.1287, found: 260.1287.

Reaction of pyranoside **5aa** to compounds **8** and **9**:

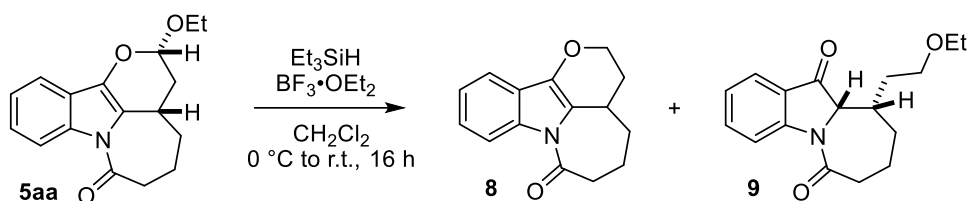

Pyranoside **5aa** (28.5 mg, 0.10 mmol) was dissolved in  $\text{CH}_2\text{Cl}_2$  (5.00 mL) at 0 °C.  $\text{Et}_3\text{SiH}$  (70.0  $\mu\text{L}$ , 0.44 mmol) was added followed by dropwise addition of  $\text{BF}_3\cdot\text{OEt}_2$  (30.0  $\mu\text{L}$ , 0.23 mmol). The mixture was allowed to warm to r.t. over 16 h.  $\text{NaHCO}_3$  (aq.) was added, the layers were separated and the aqueous layer was extracted with  $\text{EtOAc}$  (3  $\times$ ). The combined organic layer was dried with  $\text{Na}_2\text{SO}_4$ , filtered and concentrated. Purification of the crude product by column chromatography (silica gel,  $\text{Et}_2\text{O}/\text{PhCH}_3$  1:3) afforded compound **8** (colorless solid, 8.5 mg, 35%) and compound **9** (colorless oil, 13.5 mg, 47%).

### 2,3,3a,4,5,6-hexahydro-7H-1-oxa-7a-azacyclohepta[*jk*]fluorene-7-one (**8**)

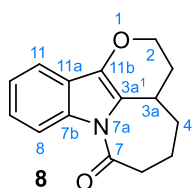

$R_f = 0.58$  (silica,  $\text{Et}_2\text{O}/\text{PhCH}_3$  1:3), **m.p.** = 155-157°C.

**$^1\text{H-NMR}$**  (300 MHz,  $\text{CDCl}_3$ ):  $\delta$  = 8.48 (ddd,  $J = 7.6, 1.4, 0.7$  Hz, 1 H, 8-H), 7.49 ( $m_c$ , 1 H, 11-H), 7.36 – 7.29 (m, 1 H, 9-H), 7.26 (td,  $J = 7.6, 1.4$  Hz, 1 H, 10-H), 4.34 (ddd,  $J = 11.0, 5.7, 3.2$  Hz, 1 H, 2- $\text{H}^a$ ), 4.25 (ddd,  $J = 11.0, 9.1, 2.6$  Hz, 1 H, 2- $\text{H}^b$ ), 3.26 – 3.14 (m, 1 H, 3a-H), 3.05 – 2.92 (m, 1 H, 6- $\text{H}^a$ ), 2.78 (dt,  $J = 14.7, 4.0$  Hz, 1 H, 6- $\text{H}^b$ ), 2.16 (dtd,  $J = 14.0, 6.0, 2.5$  Hz, 1 H, 3- $\text{H}^a$ ), 2.11 – 1.96 (m, 3 H, 4- $\text{H}^a$ , 5- $\text{H}^a$ , 5- $\text{H}^b$ ), 1.76 (dddd,  $J = 14.0, 9.1, 7.5, 3.3$  Hz, 1 H, 3- $\text{H}^b$ ), 1.63 – 1.53 (m, 1 H, 4- $\text{H}^b$ ) ppm.

**$^{13}\text{C-NMR}$**  (75 MHz,  $\text{CDCl}_3$ ):  $\delta$  = 172.2 (C-7), 139.4 (C-11b), 133.8 (C-7b), 125.3 (C-9), 123.5 (C-10), 122.4 (C-11a), 118.3 (C-3a<sup>1</sup>), 116.6 (C-11), 116.5 (C-8), 65.8 (C-2), 36.0 (C-6), 30.7 (C-4), 30.4 (C-3a), 29.7 (C-3), 20.9 (C-5) ppm.

**IR:**  $\tilde{\nu} = 3335, 2950, 2835, 1675, 1450, 1415, 1120, 1025, 630$   $\text{cm}^{-1}$ .

**HRMS** (EI):  $m/z$  calc. for  $\text{C}_{15}\text{H}_{15}\text{NO}_2^+$  [ $\text{M}$ ]<sup>+</sup>: 241.1097, found: 241.1097.

**(10S\*,10aS\*)-10-(2-Ethoxyethyl)-8,9,10,10a-tetrahydro-6H-azepino[1,2-a]indole-6,11(7H)-dione (9)**

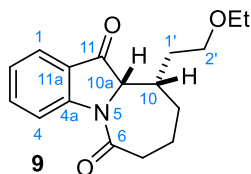

$R_f = 0.23$  (silica, Et<sub>2</sub>O/PhCH<sub>3</sub> 1:3).

**<sup>1</sup>H-NMR** (300 MHz, CDCl<sub>3</sub>):  $\delta = 8.57$  (dt,  $J = 8.4, 0.8$  Hz, 1 H, 4-H), 7.72 (ddd,  $J = 7.7, 1.5, 0.8$  Hz, 1 H, 1-H), 7.65 (ddd,  $J = 8.4, 7.7, 1.5$  Hz, 1 H, 3-H), 7.20 (td,  $J = 7.7, 0.8$  Hz, 1 H, 2-H), 4.29 (d,  $J = 1.5$  Hz, 1 H, 10a-H), 3.33 (m<sub>c</sub>, 2 H, O-CH<sub>2</sub><sup>a</sup>, O-CH<sub>2</sub><sup>b</sup>), 3.30 – 3.23 (m, 2 H, 2'-H<sup>a</sup>, 2'-H<sup>b</sup>), 2.80 – 2.67 (m, 2 H, 7-H<sup>a</sup>, 10-H), 2.66 – 2.54 (m, 1 H, 7-H<sup>b</sup>), 2.19 – 2.09 (m, 1 H, 9-H<sup>a</sup>), 1.95 – 1.71 (m, 3 H, 8-H<sup>a</sup>, 8-H<sup>b</sup>, 9-H<sup>b</sup>), 1.49 (m<sub>c</sub>, 1 H, 1'-H<sup>a</sup>), 1.26 – 1.13 (m, 1 H, 1'-H<sup>b</sup>), 1.11 (t,  $J = 7.1$  Hz, 3 H, CH<sub>3</sub>) ppm.

**<sup>13</sup>C-NMR** (75 MHz, CDCl<sub>3</sub>):  $\delta = 198.3$  (C-11), 172.4 (C-6), 153.7 (C-4a), 137.4 (C-3), 124.5 (C-11a), 124.2 (C-2), 123.5 (C-1), 118.5 (C-4), 69.7 (C-10a), 68.2 (C-2'), 66.1 (O-CH<sub>2</sub>), 39.7 (C-7), 37.1 (C-10), 32.7 (C-9), 24.5 (C-1'), 18.9 (C-8), 15.1 (CH<sub>3</sub>) ppm.

**IR:**  $\tilde{\nu} = 3330, 2950, 2840, 1720, 1660, 1470, 1450, 1405, 1310, 1120, 1030, 620$  cm<sup>-1</sup>.

**HRMS** (EI):  $m/z$  calc. for C<sub>17</sub>H<sub>21</sub>NO<sub>2</sub><sup>+</sup> [M]<sup>+</sup>: 287.1516, found: 287.1518.

## 5 X-Ray crystal structure of compound 5aa

A single crystal of compound **5aa** suitable for X-ray crystallographic analysis was obtained by the slow evaporation of a solution of the compound in EtOH, at ambient pressure and ambient temperature.

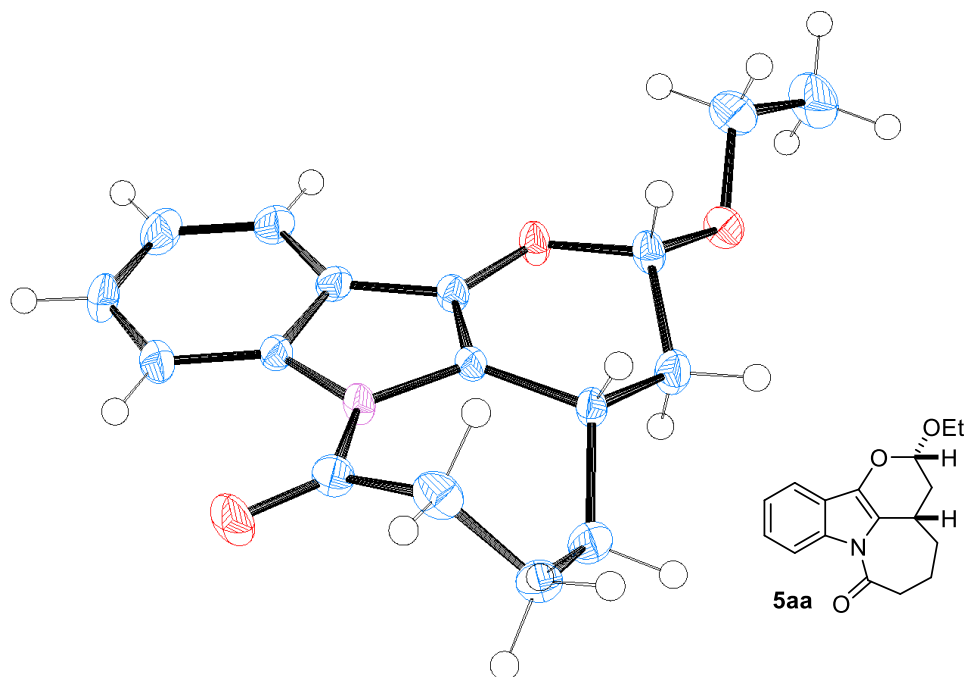

### Crystal data

|                          |            |         |        |
|--------------------------|------------|---------|--------|
| Unit cell lengths (Å)    | 19.597     | 7.623   | 19.615 |
| Unit cell angles (deg)   | 90.000     | 100.404 | 90.000 |
| Space group Hall symbol  | -P 2yn     |         |        |
| Space group HM symbol    | P 1 21/n 1 |         |        |
| Crystal class            | Monoclinic |         |        |
| International tables #   | 14         |         |        |
| Space group multiplicity | 4          |         |        |

**Figure 1.** X-Ray crystal structure of compound **5aa**, CCDC No. 2237052. Thermal ellipsoid contours shown at 50% probability level. The crystal structure data can be retrieved from the Cambridge Crystallographic Data Centre, [www.ccdc.cam.ac.uk](http://www.ccdc.cam.ac.uk).

## 6 Structure assignment by NOESY spectra

In addition to the X-ray crystal structure of compound **5aa**, all compounds **5** were analyzed by acquiring their NOESY spectra, confirming the C2,C3a-*cis*-configuration in all cases. As a typical example, the NOESY spectrum of compound **5ab** is depicted in Figure 2.

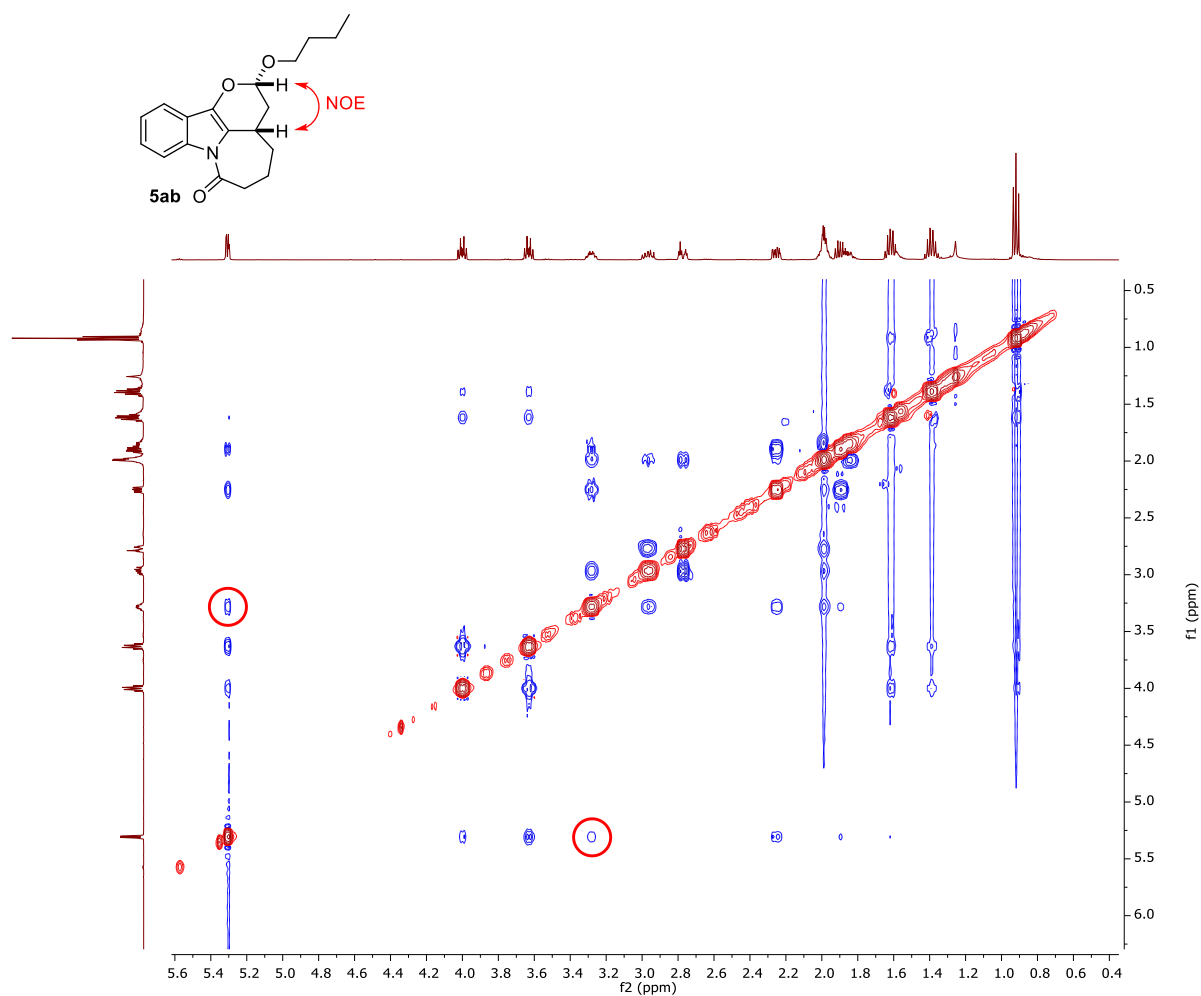

**Figure 2.** NOESY-spectrum of compound **5ab** (500 MHz, CDCl<sub>3</sub>).

## 7 NMR spectra

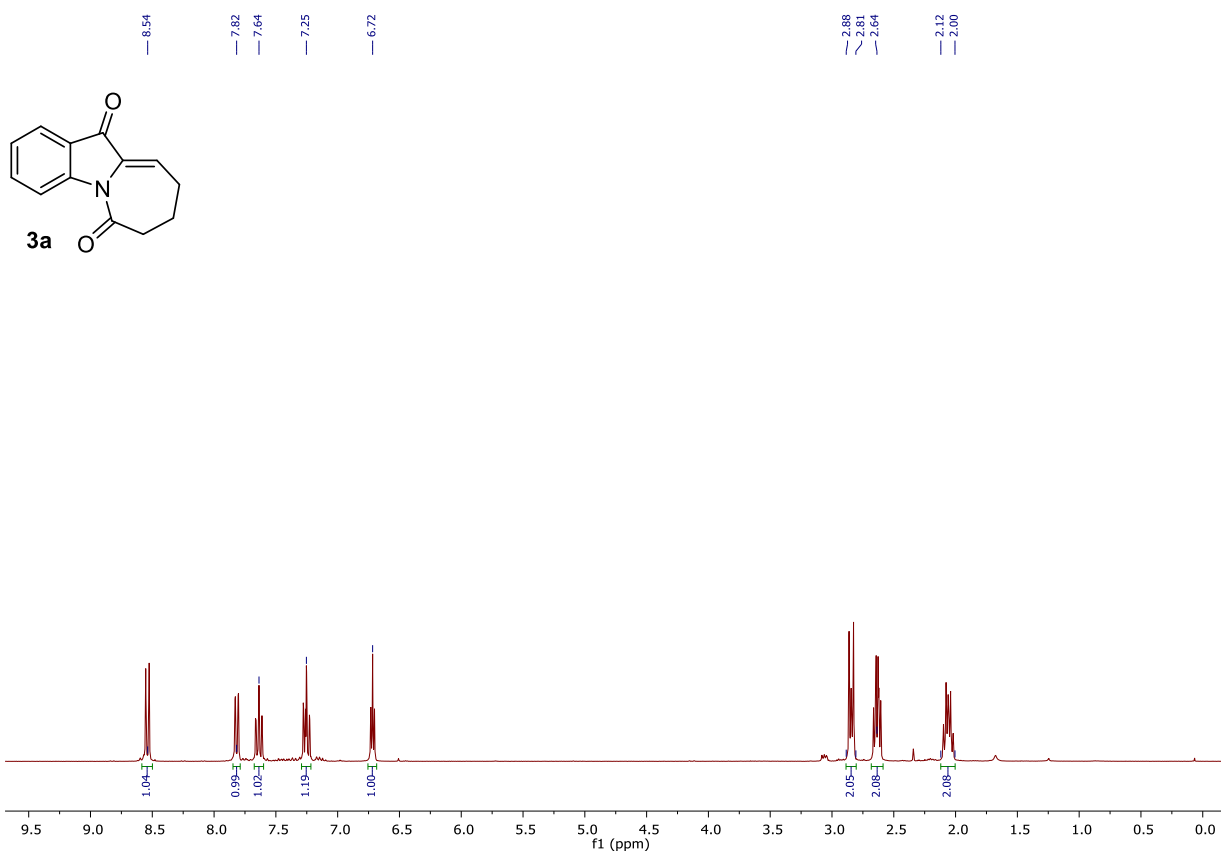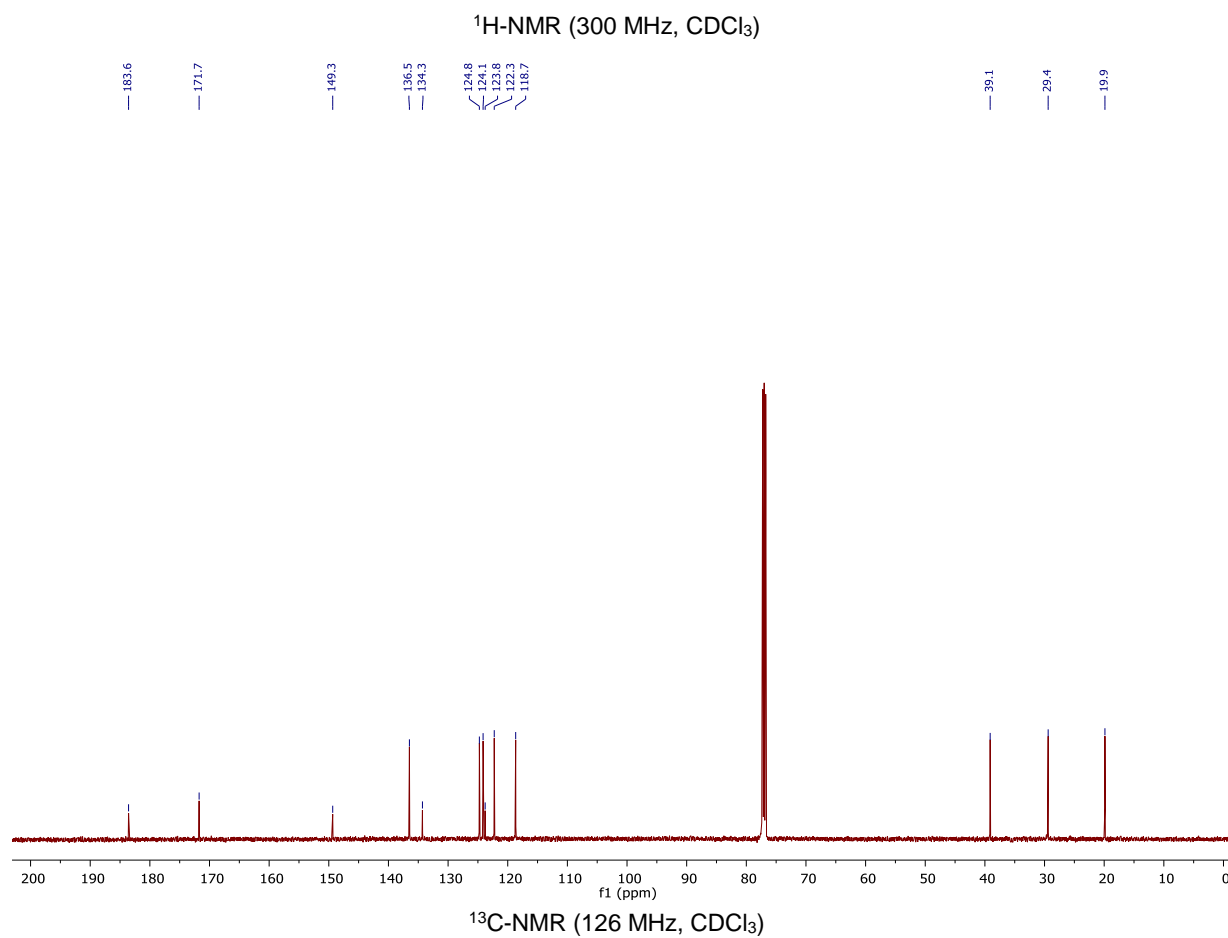

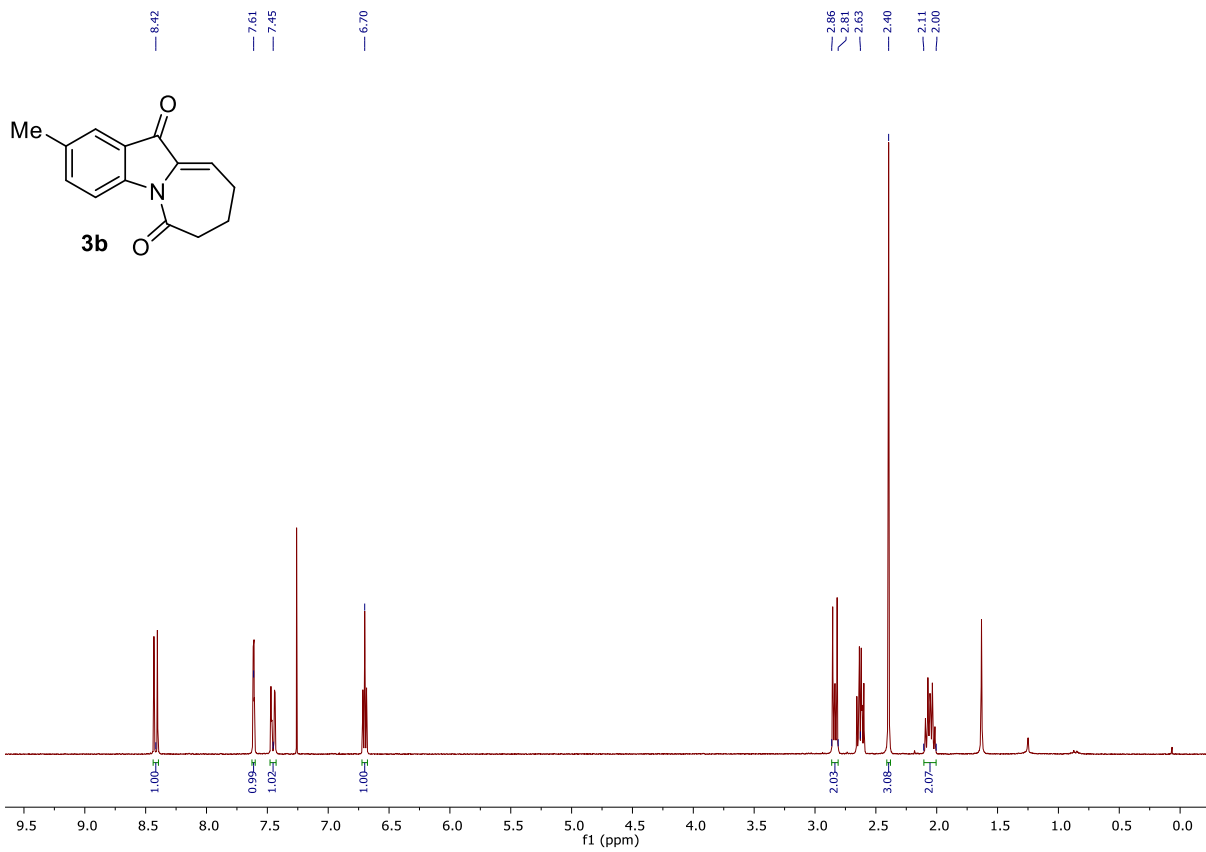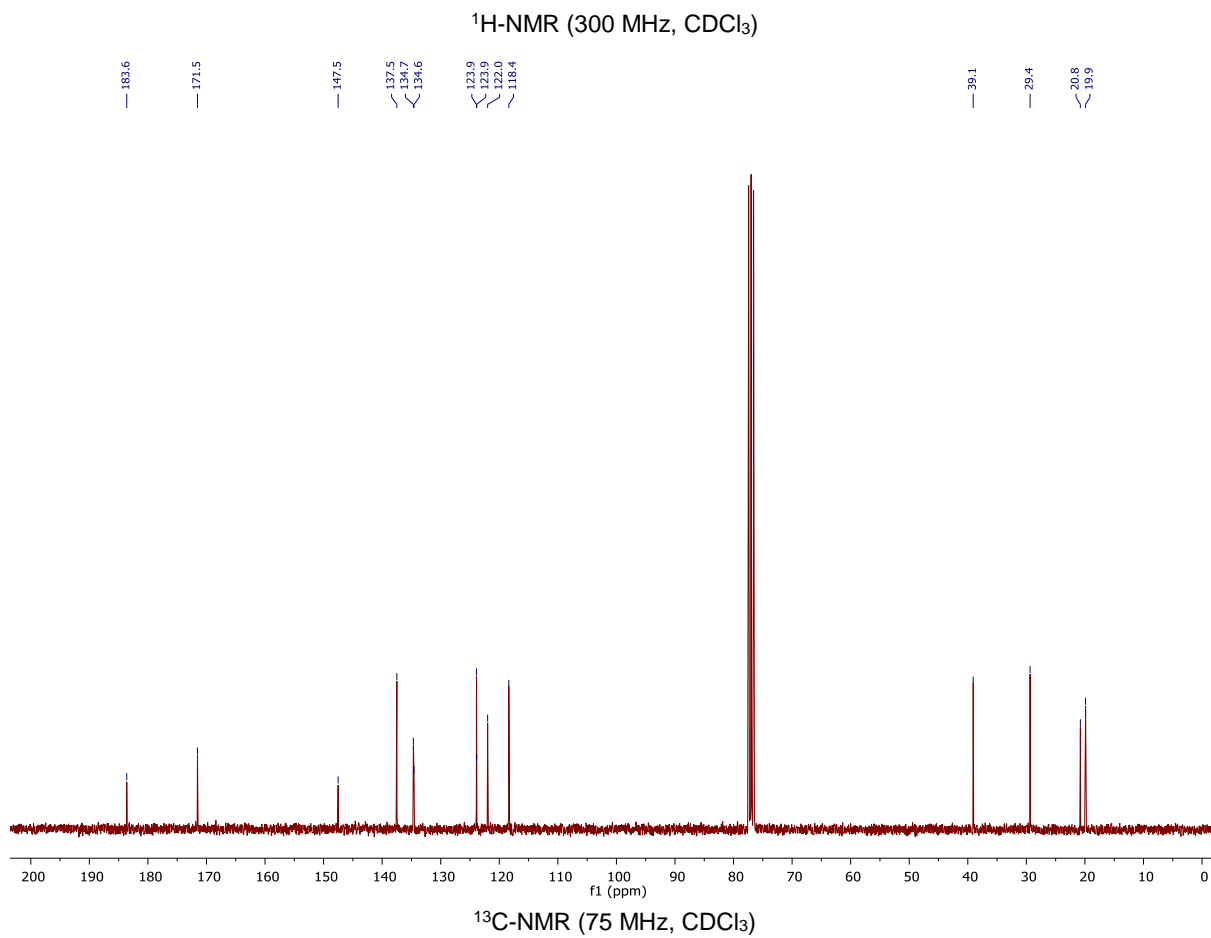



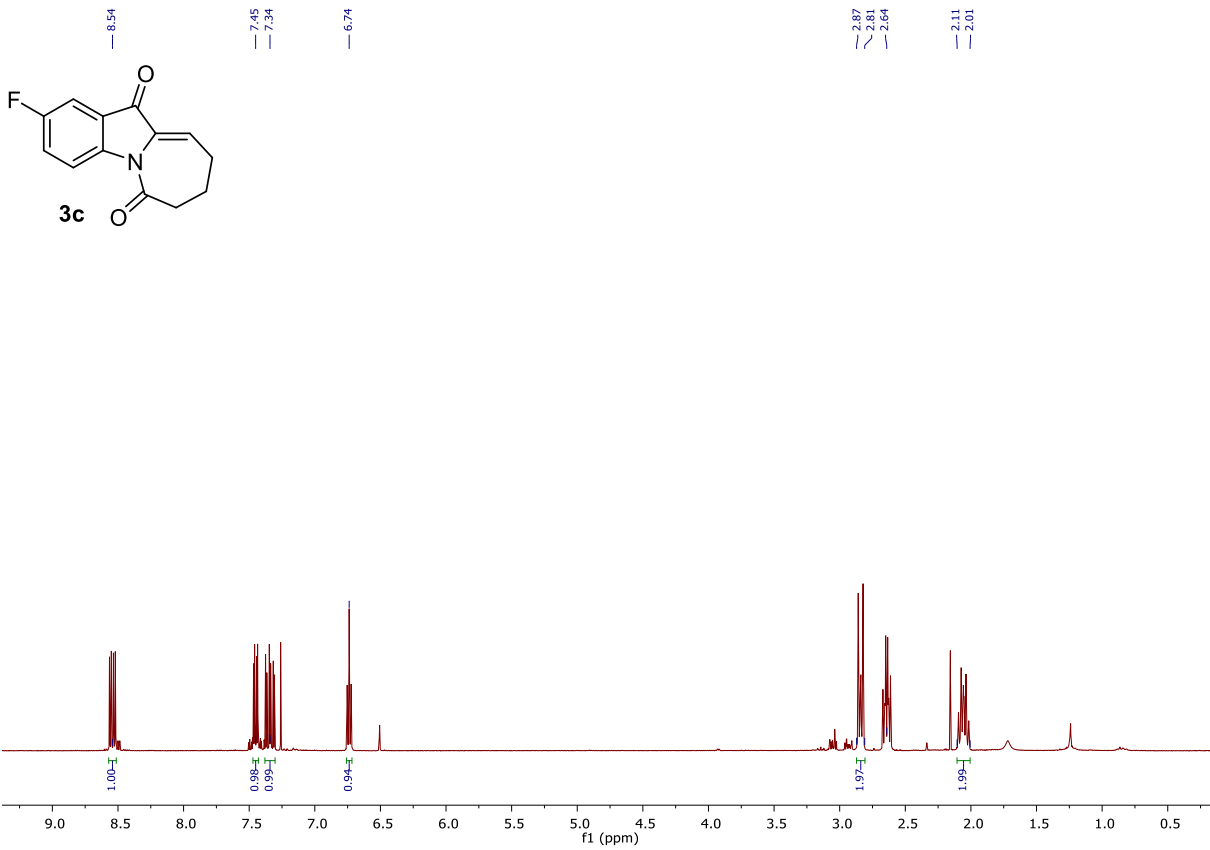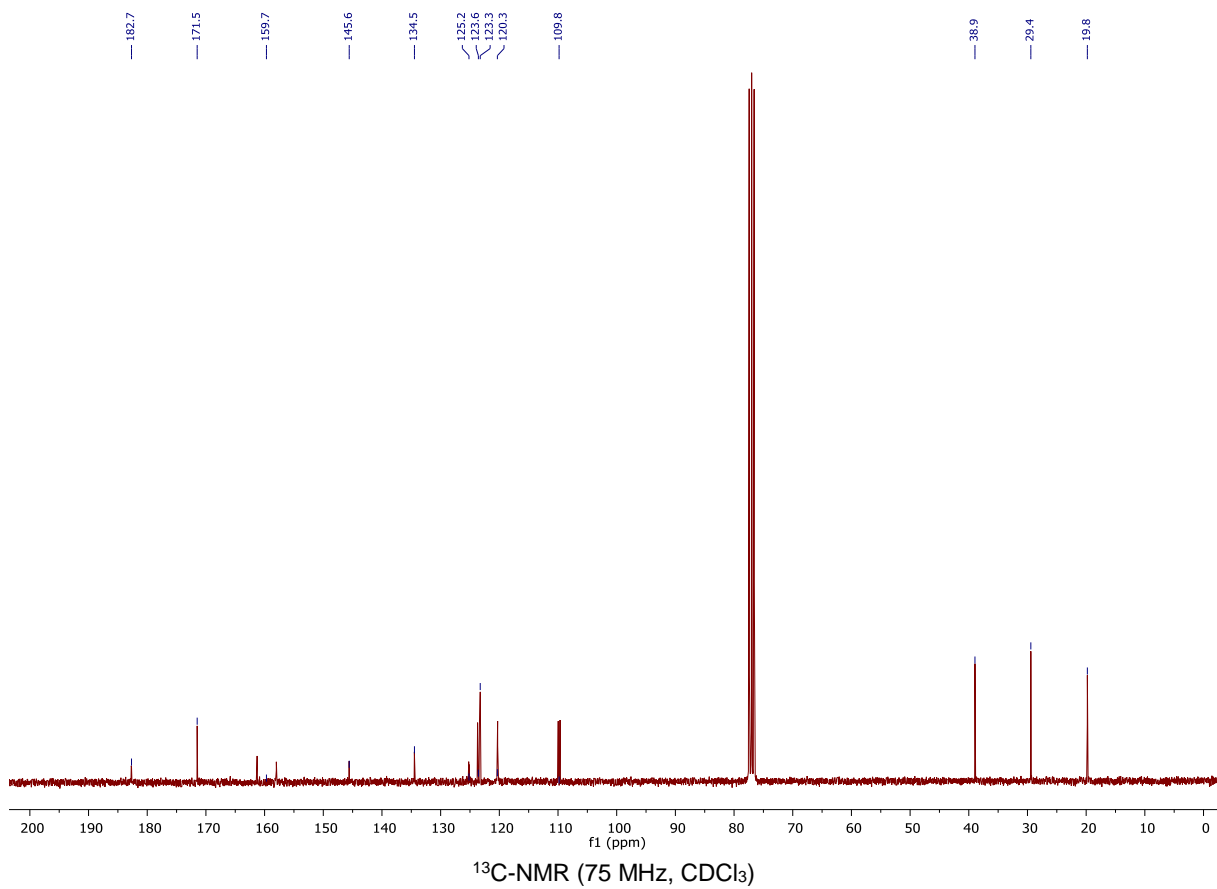

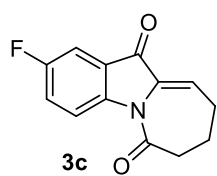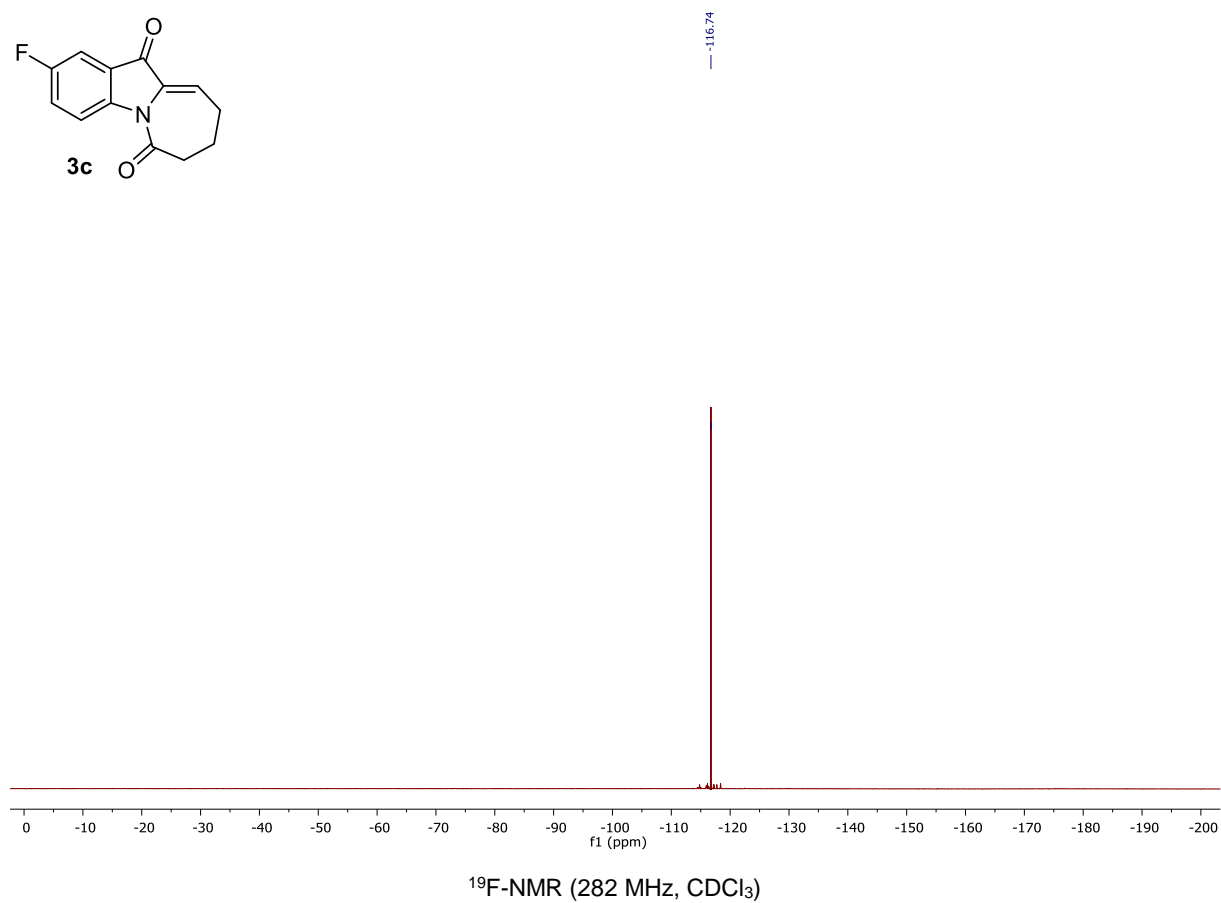

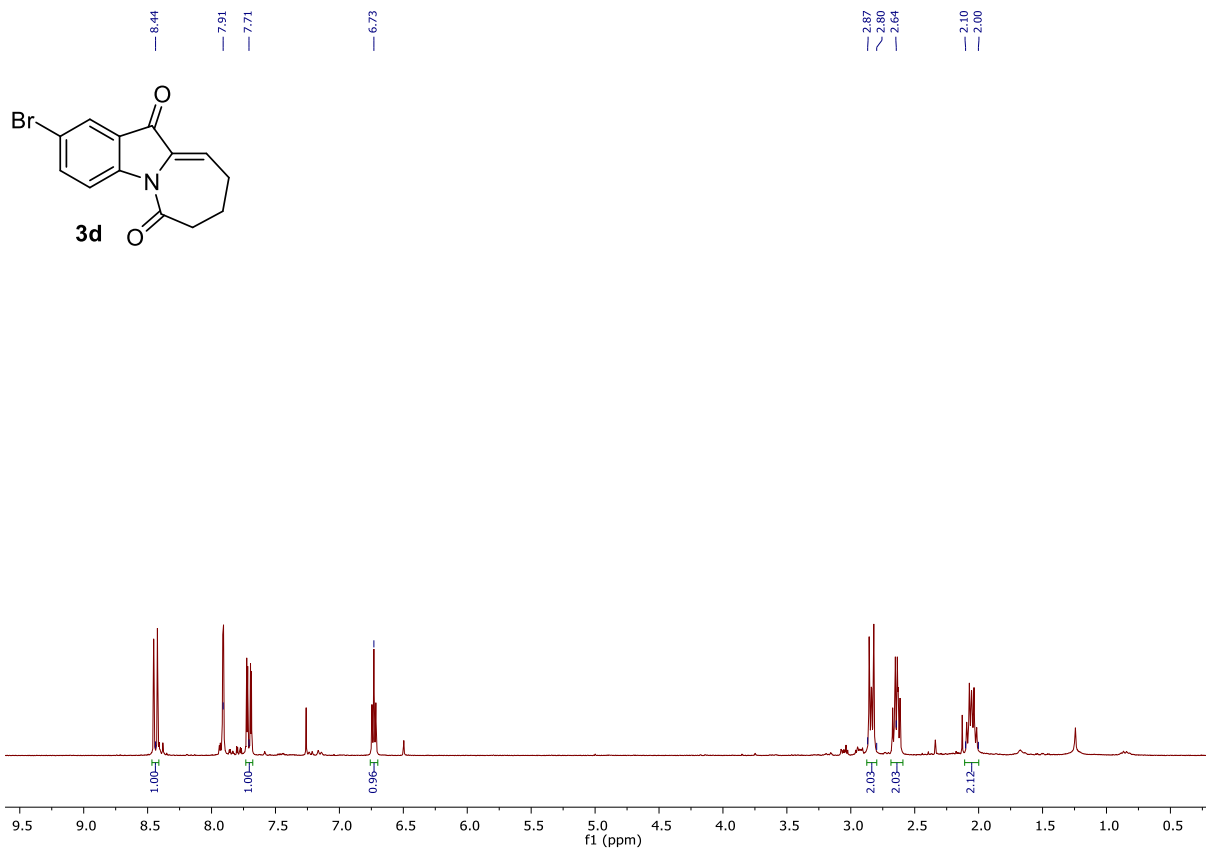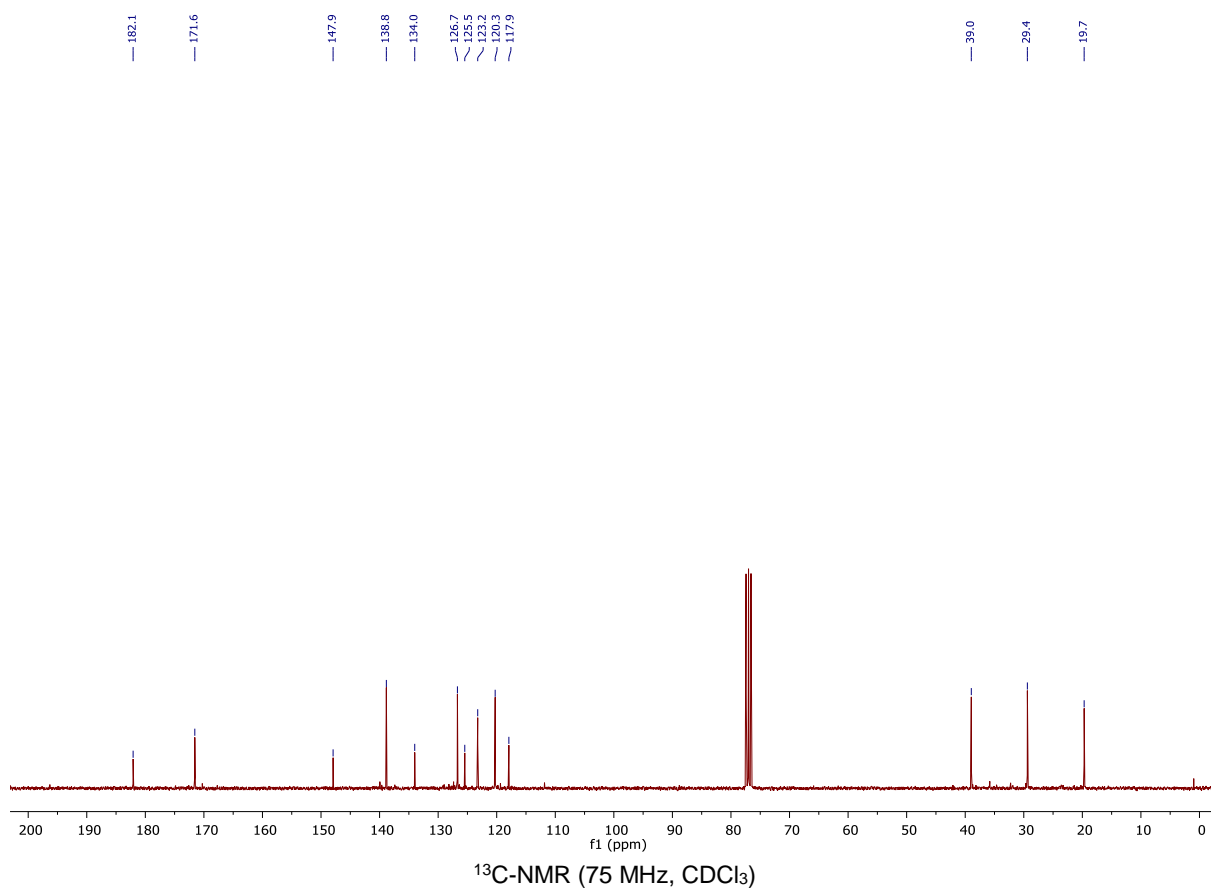

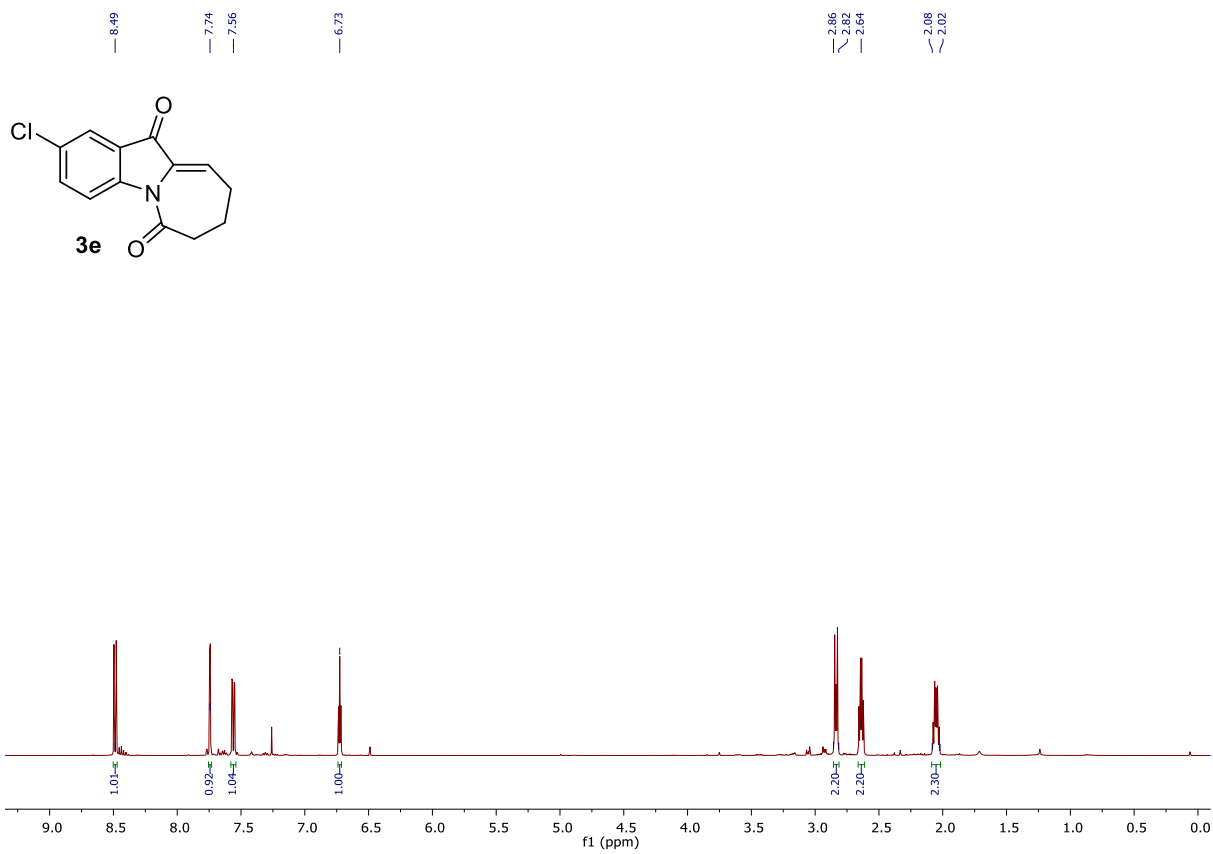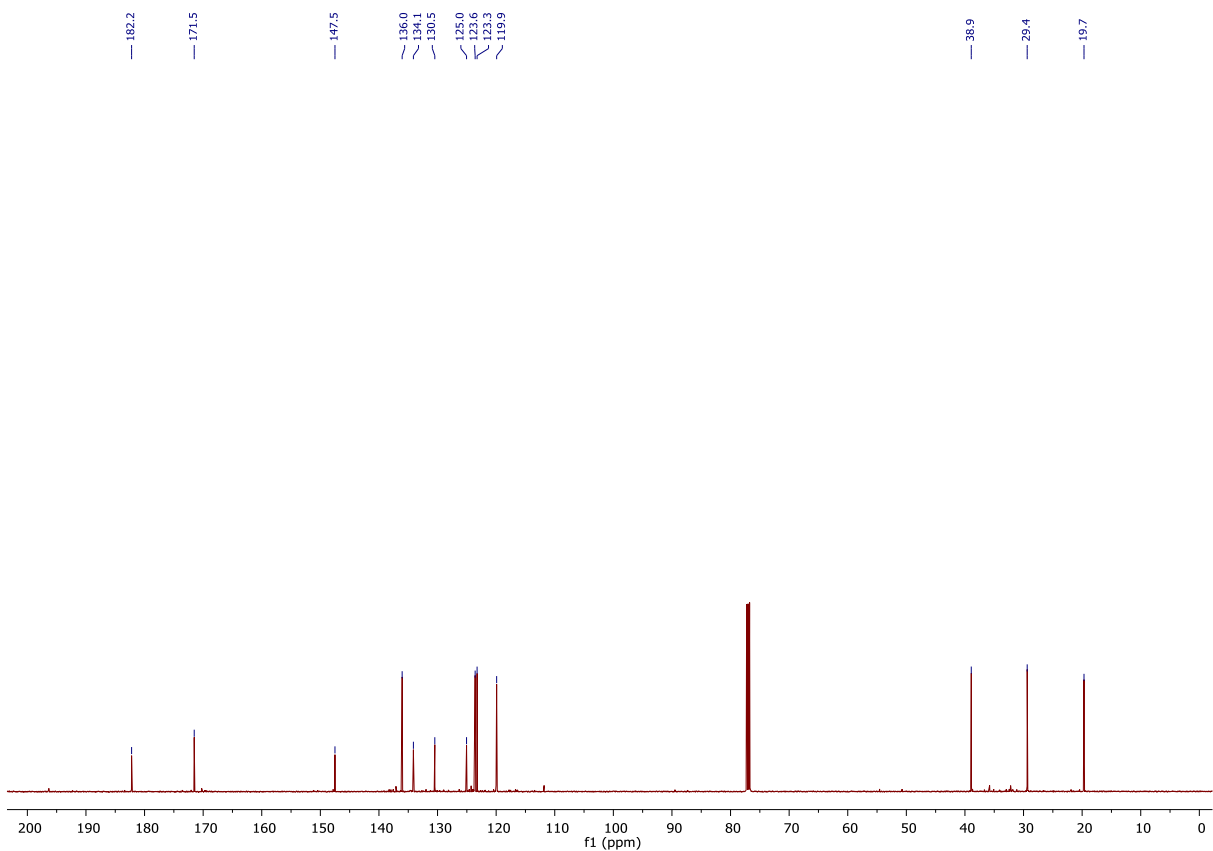

$^{13}\text{C-NMR}$  (126 MHz,  $\text{CDCl}_3$ )

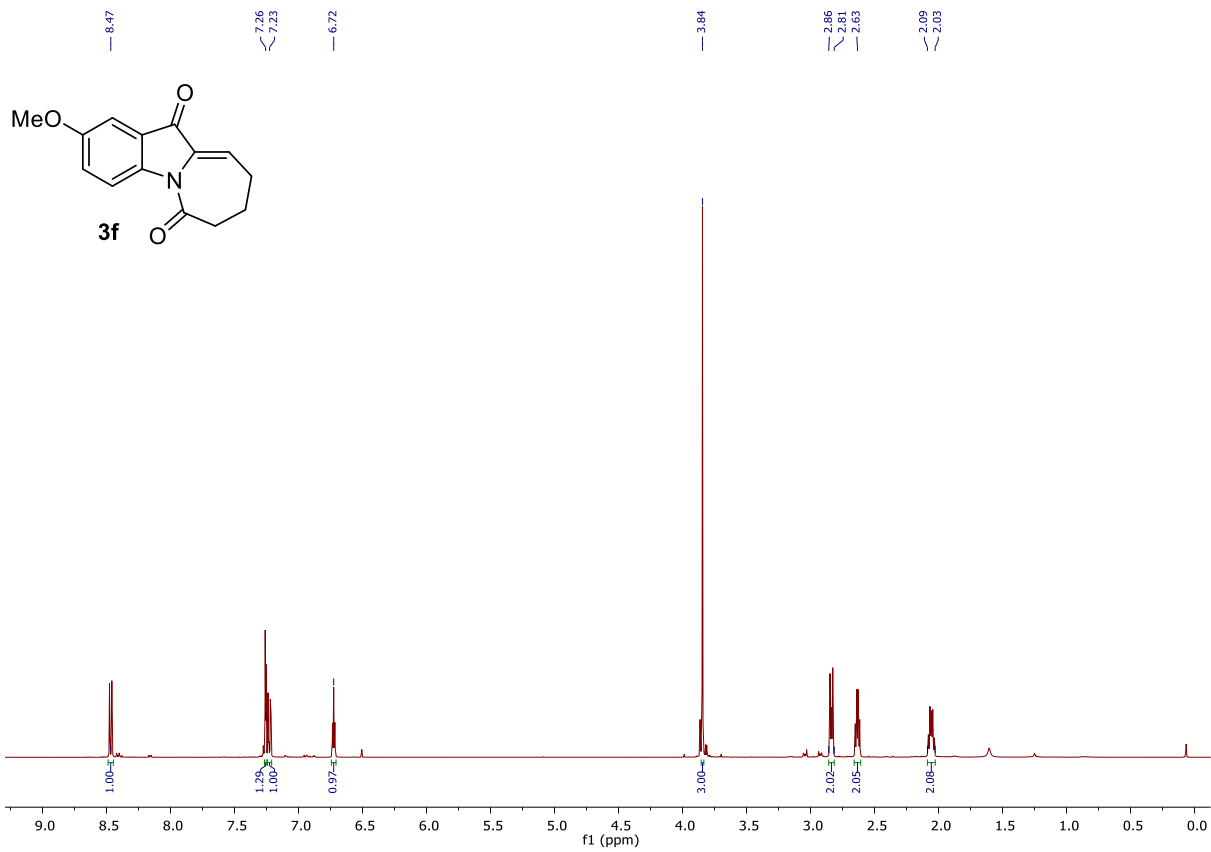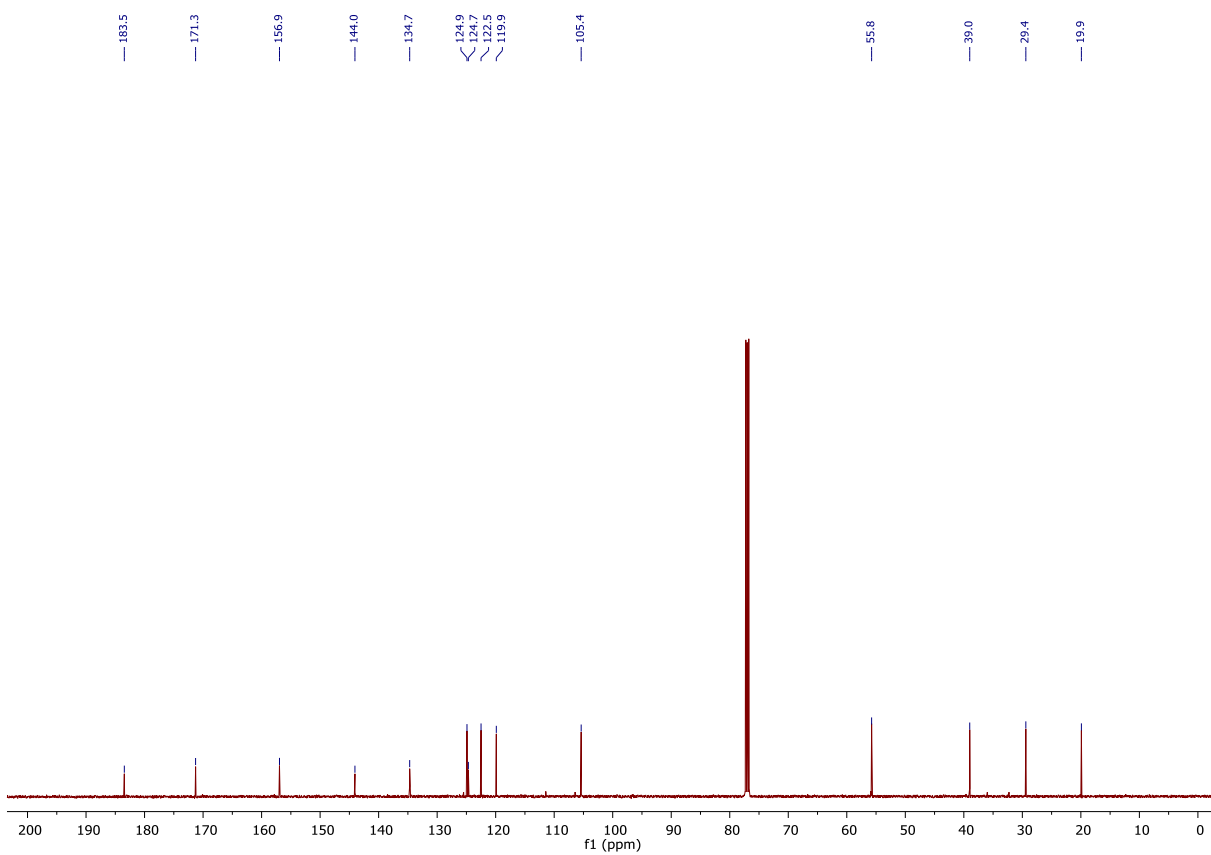

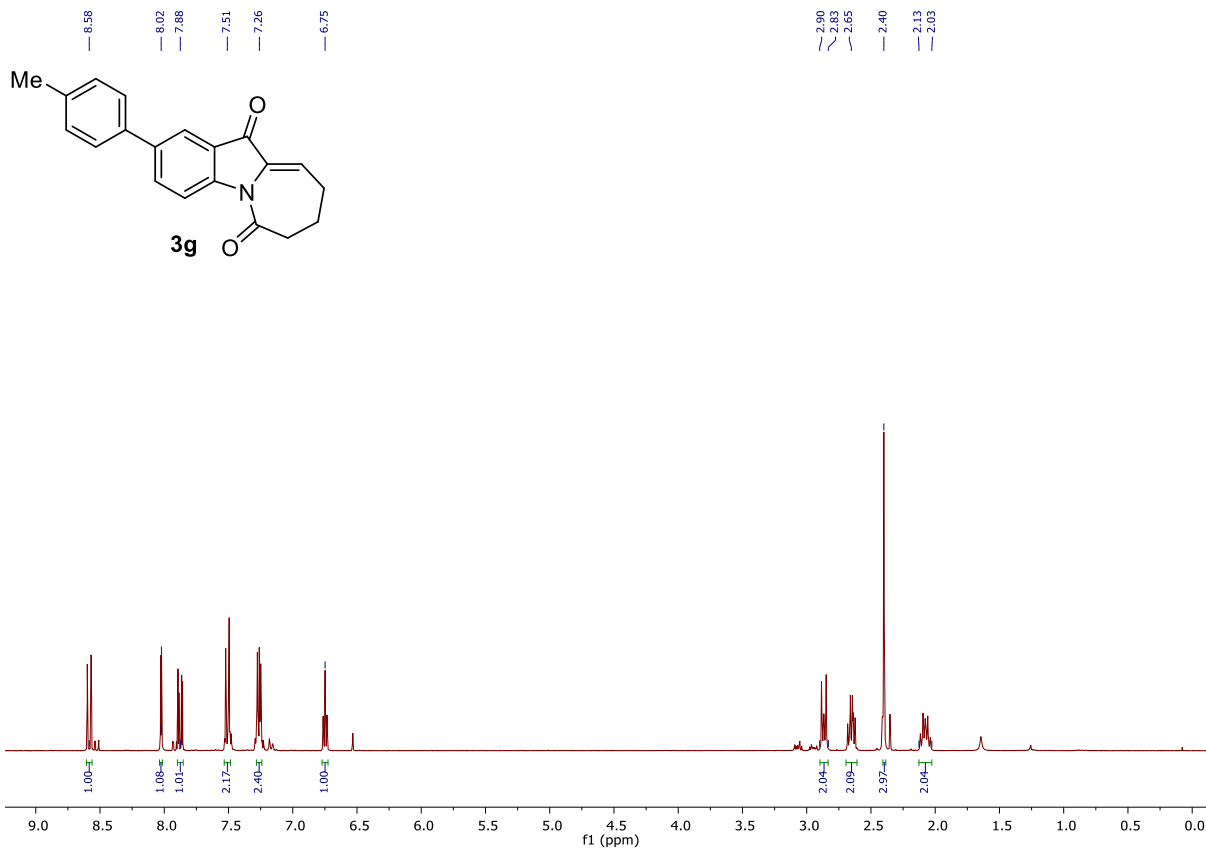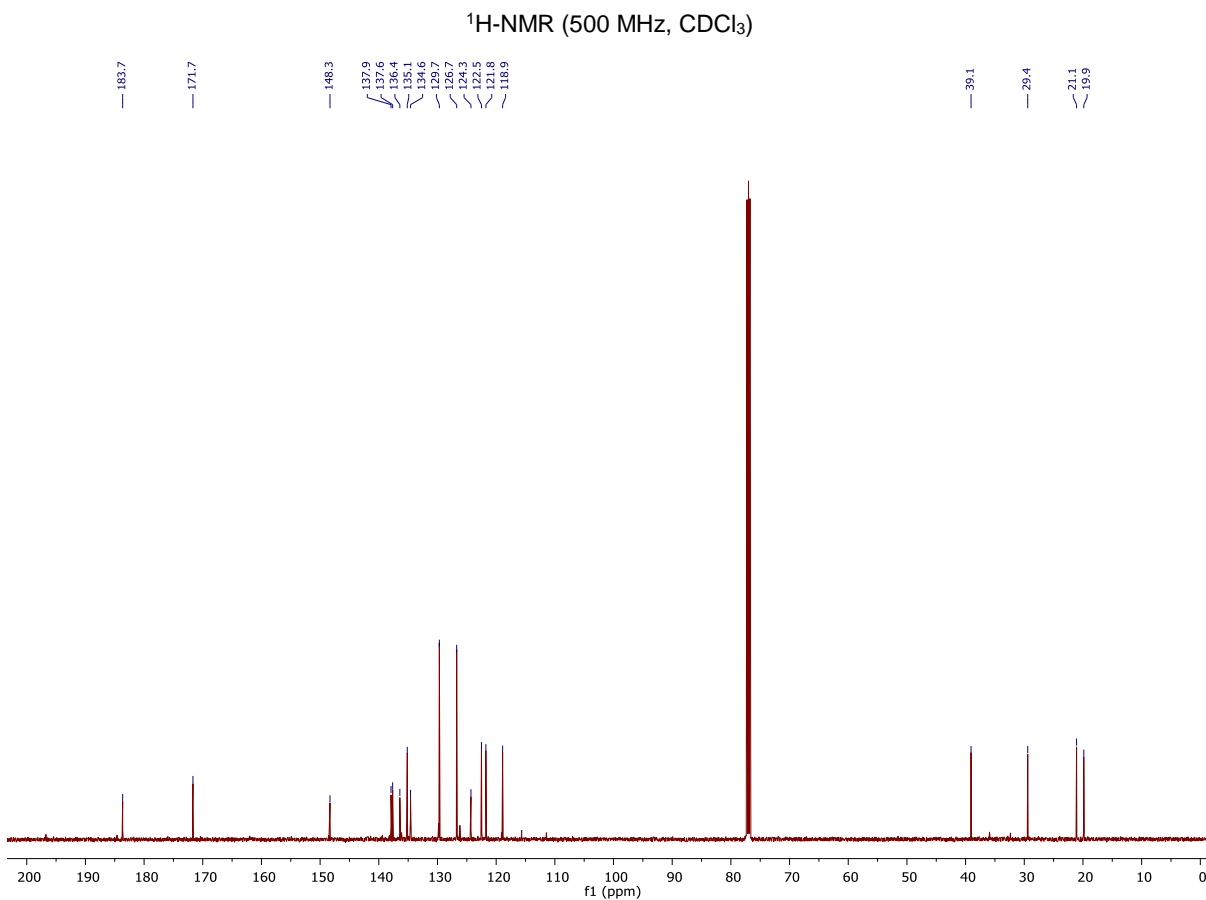

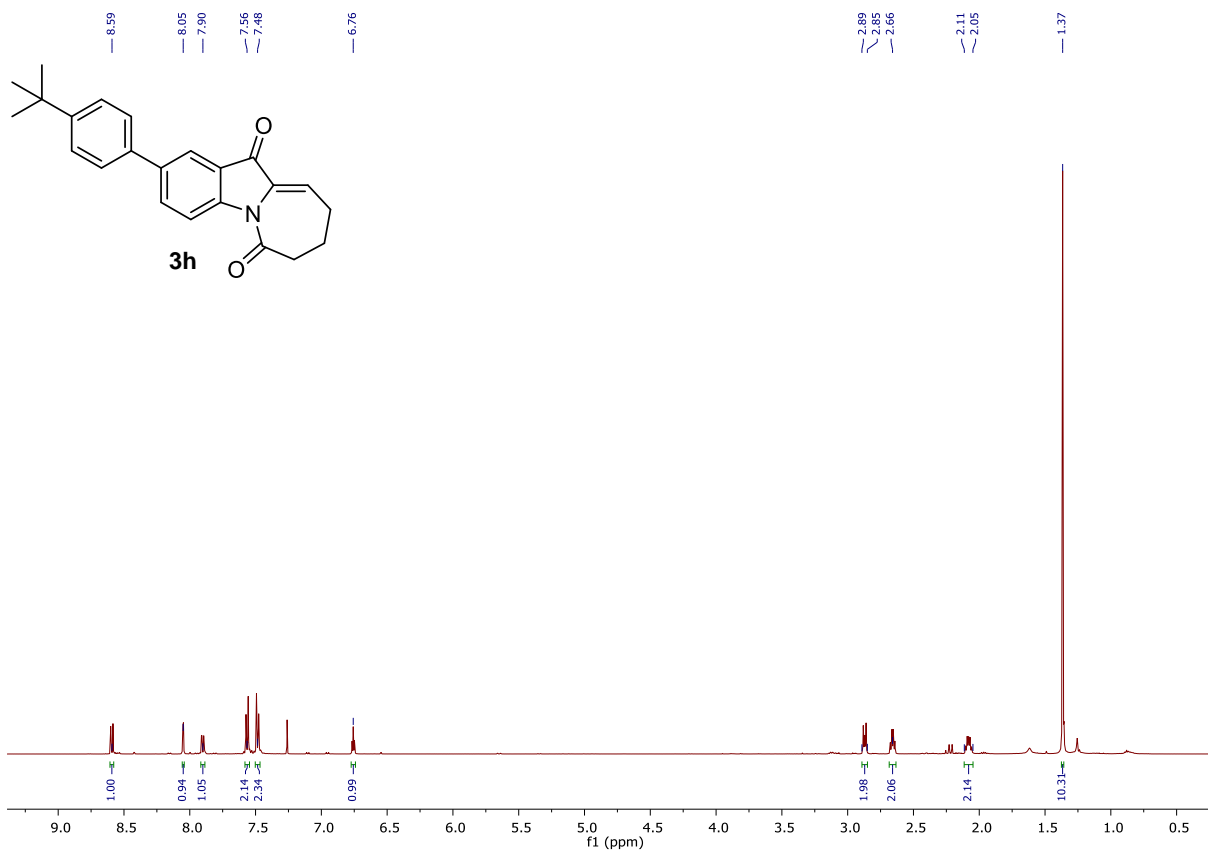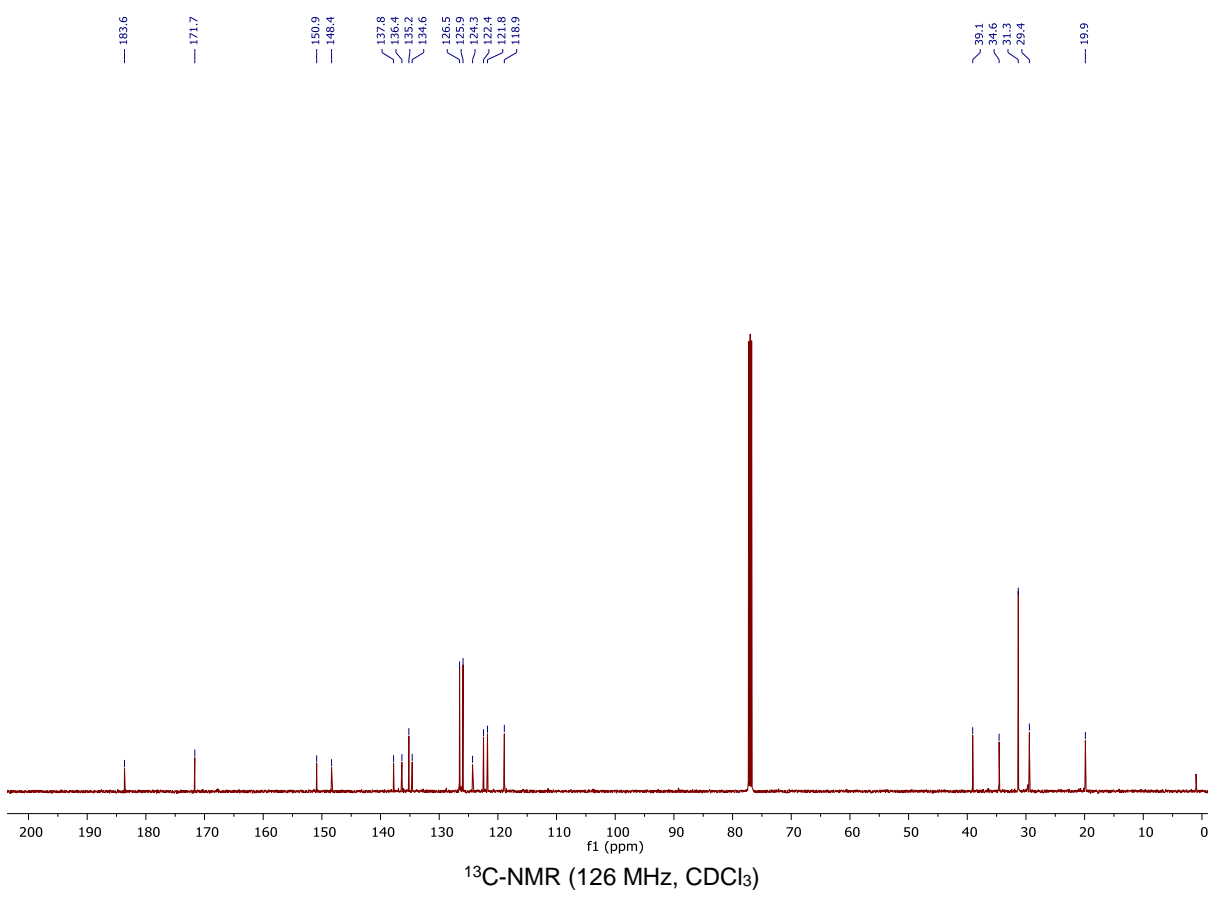

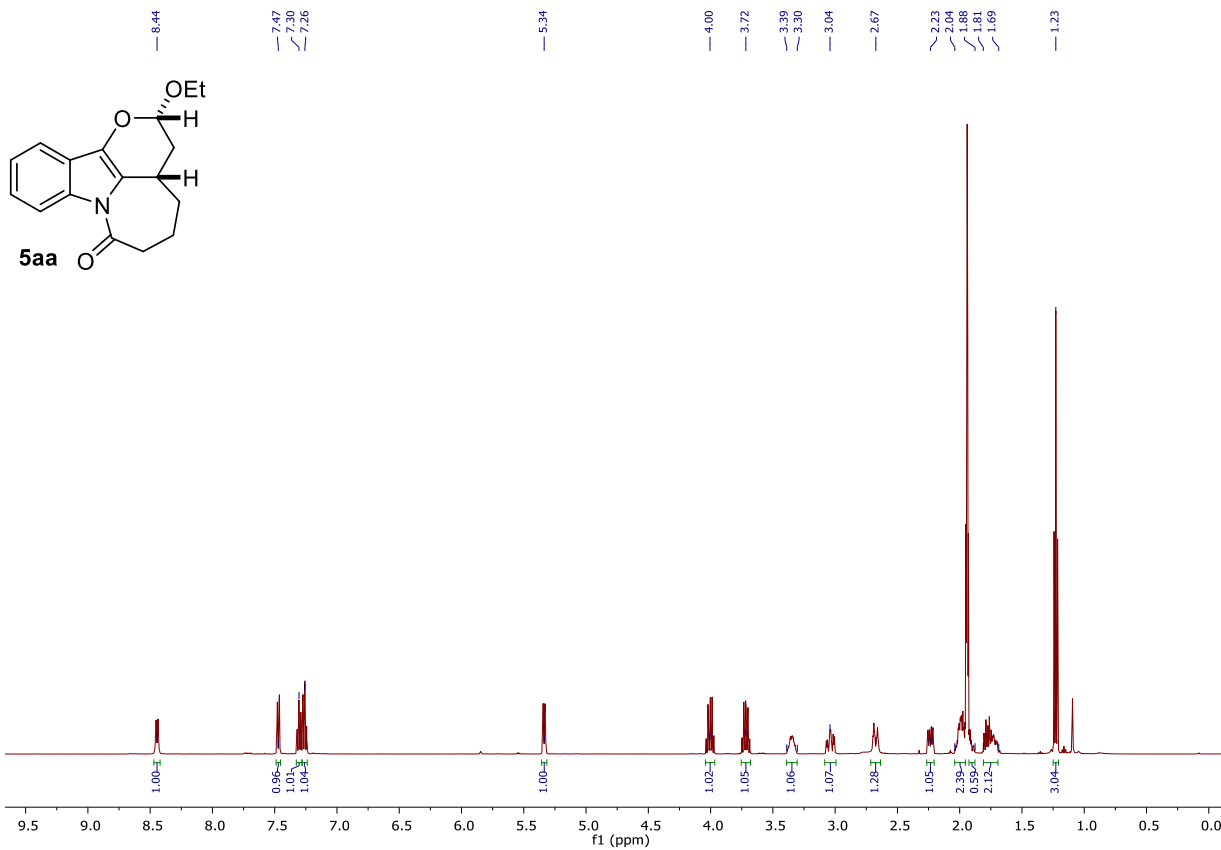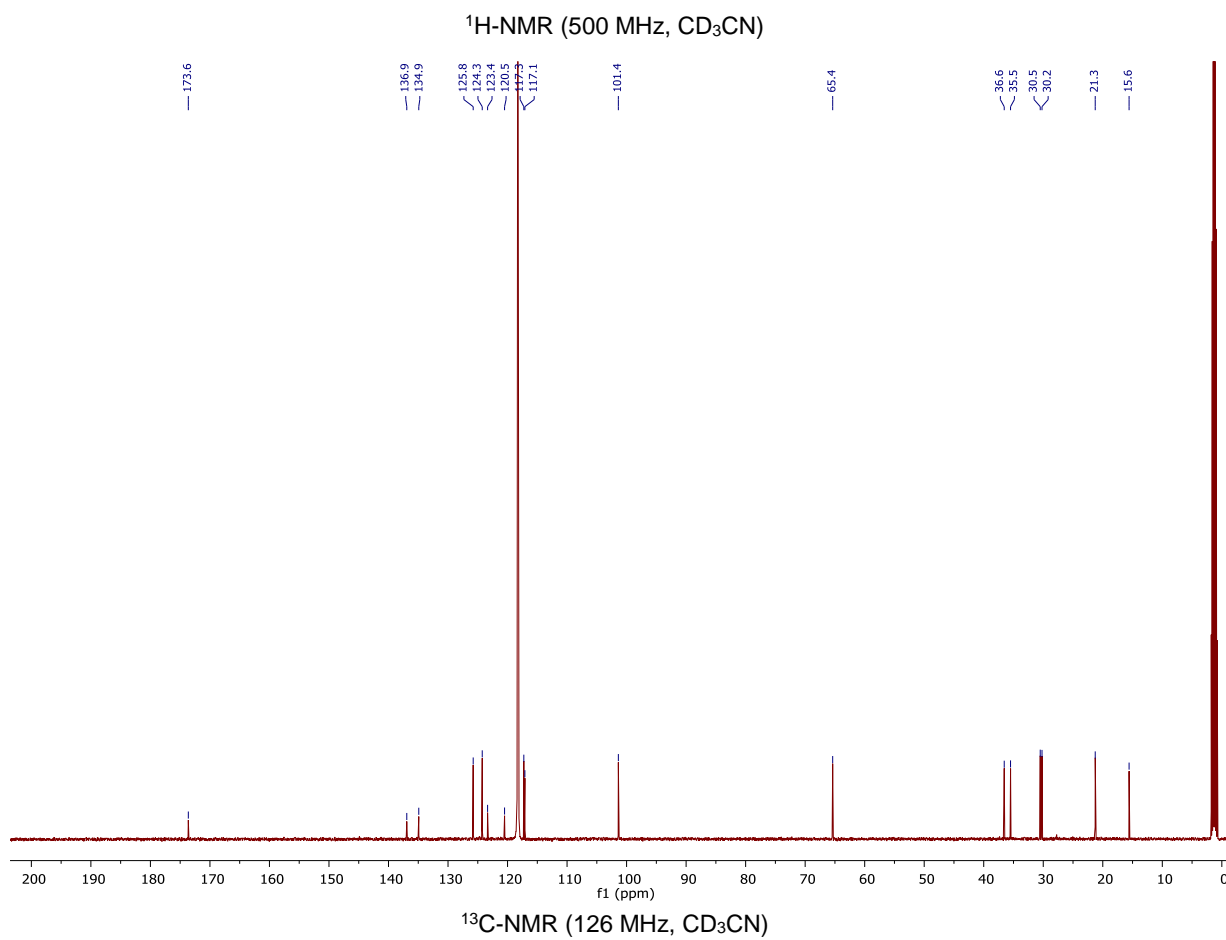



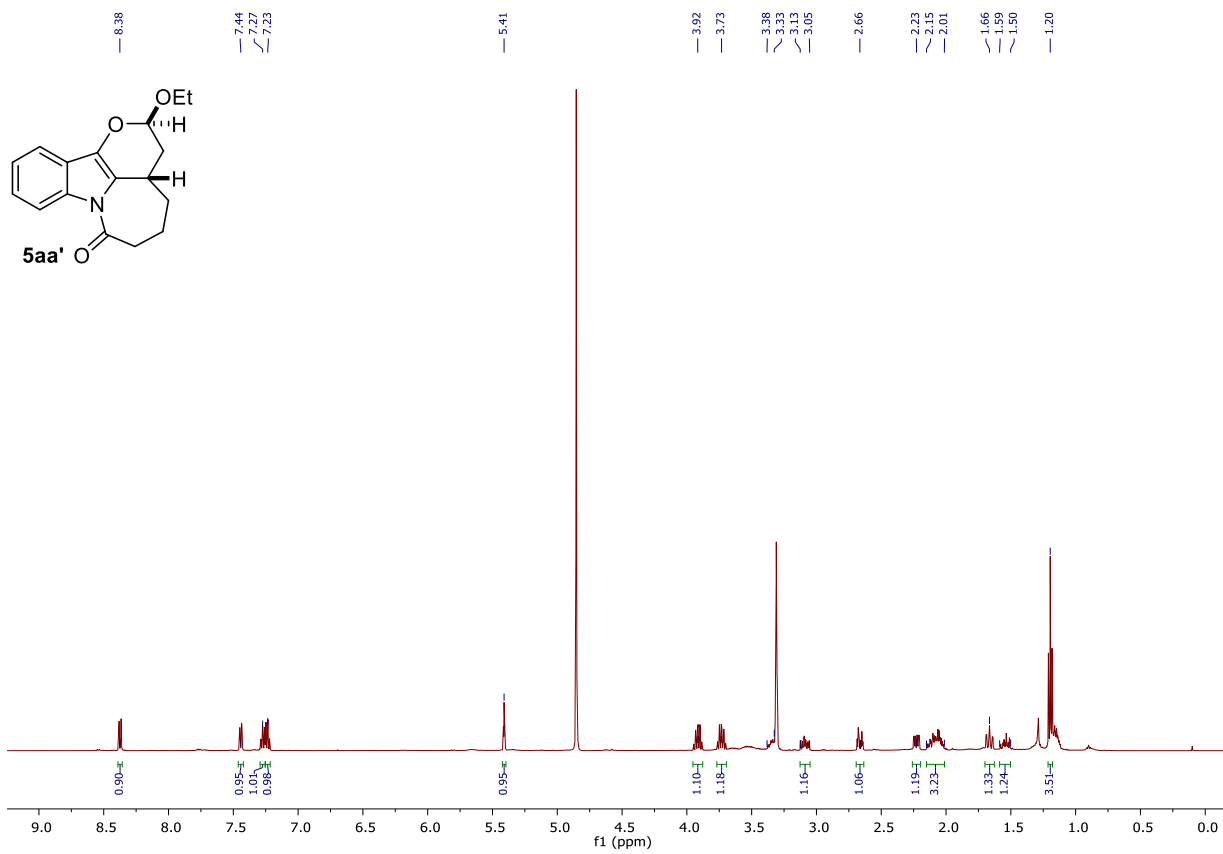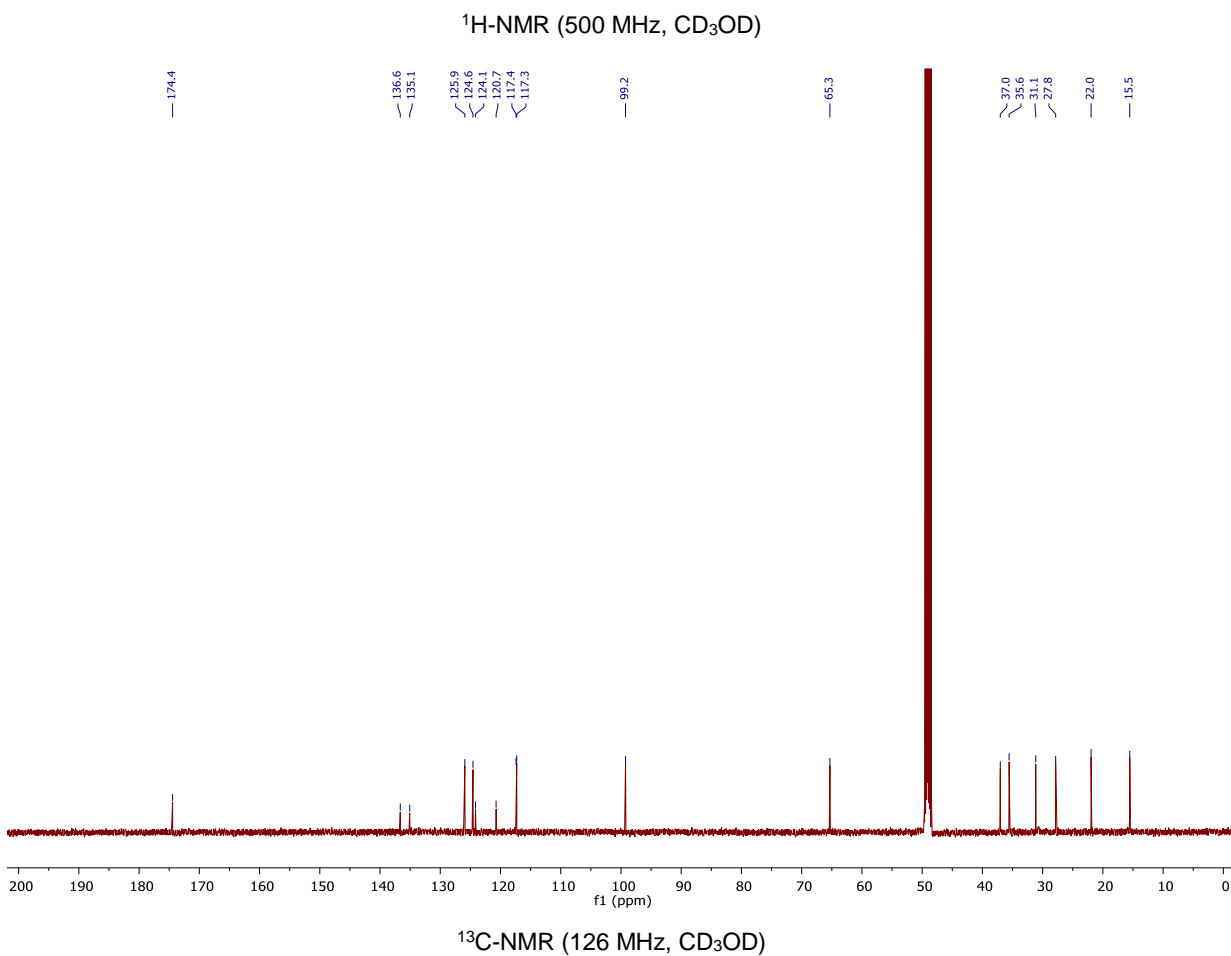

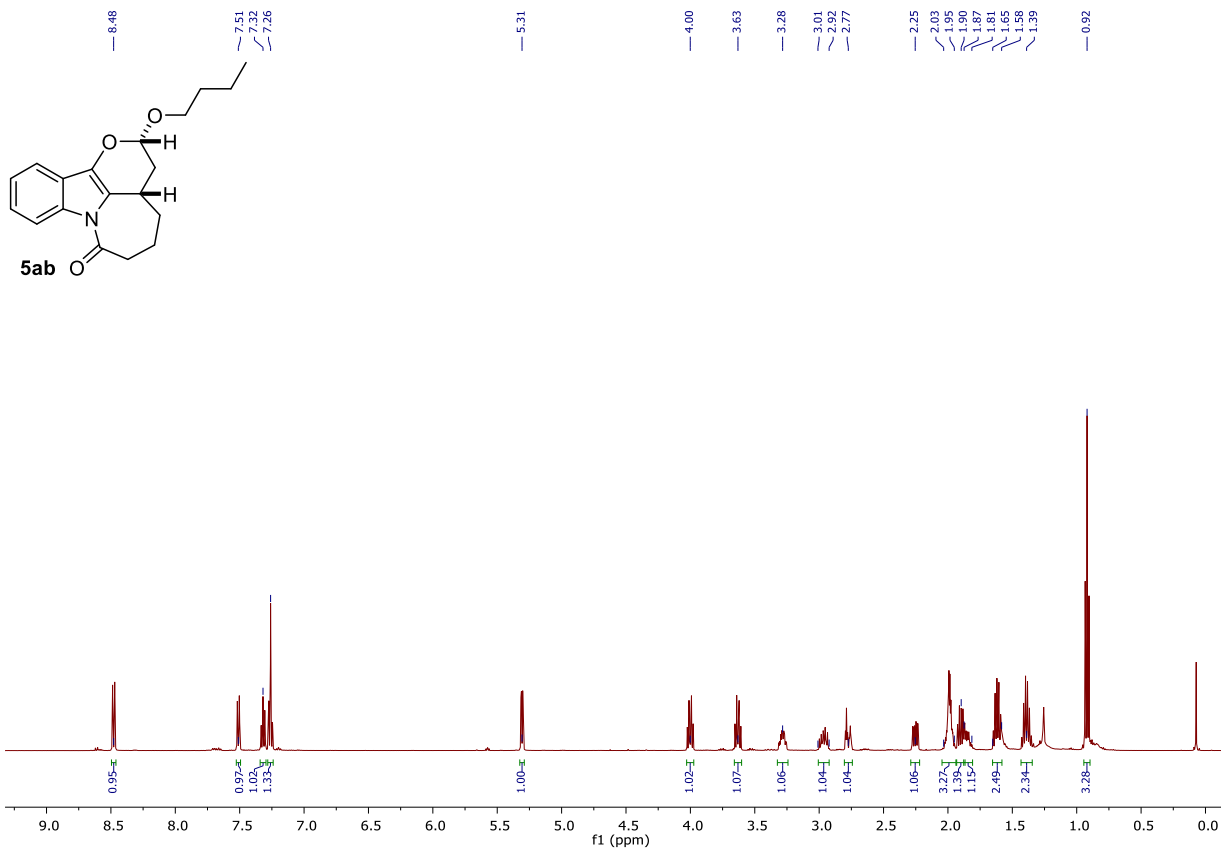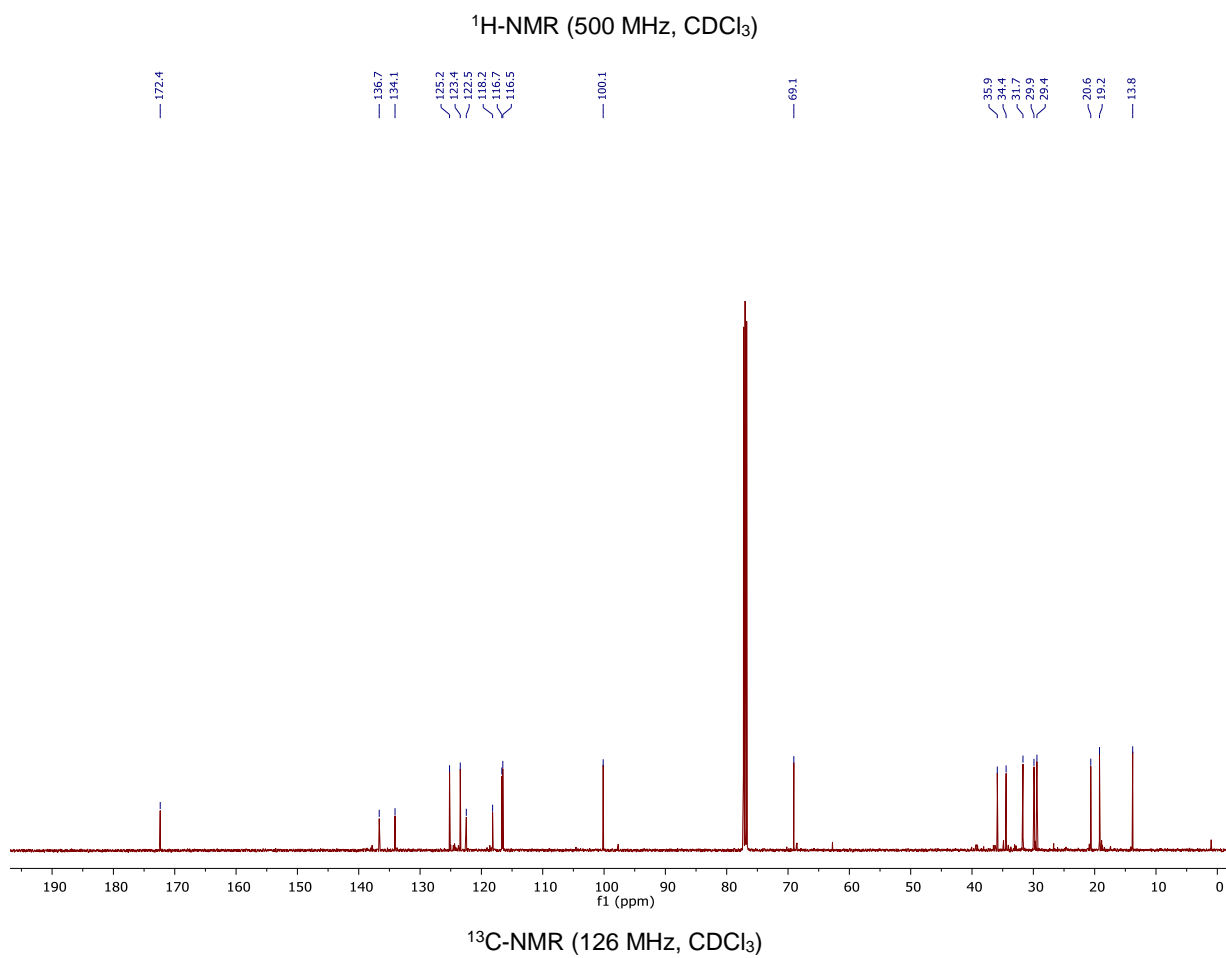

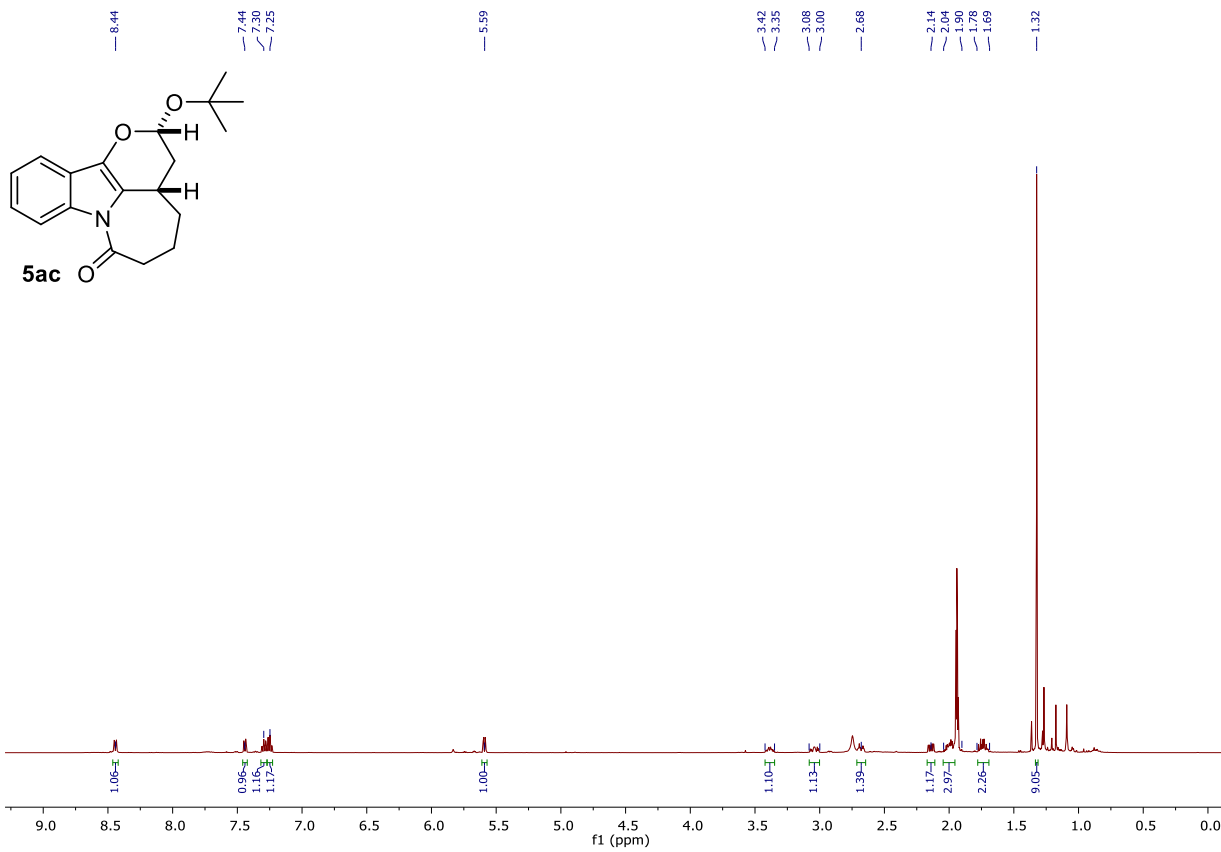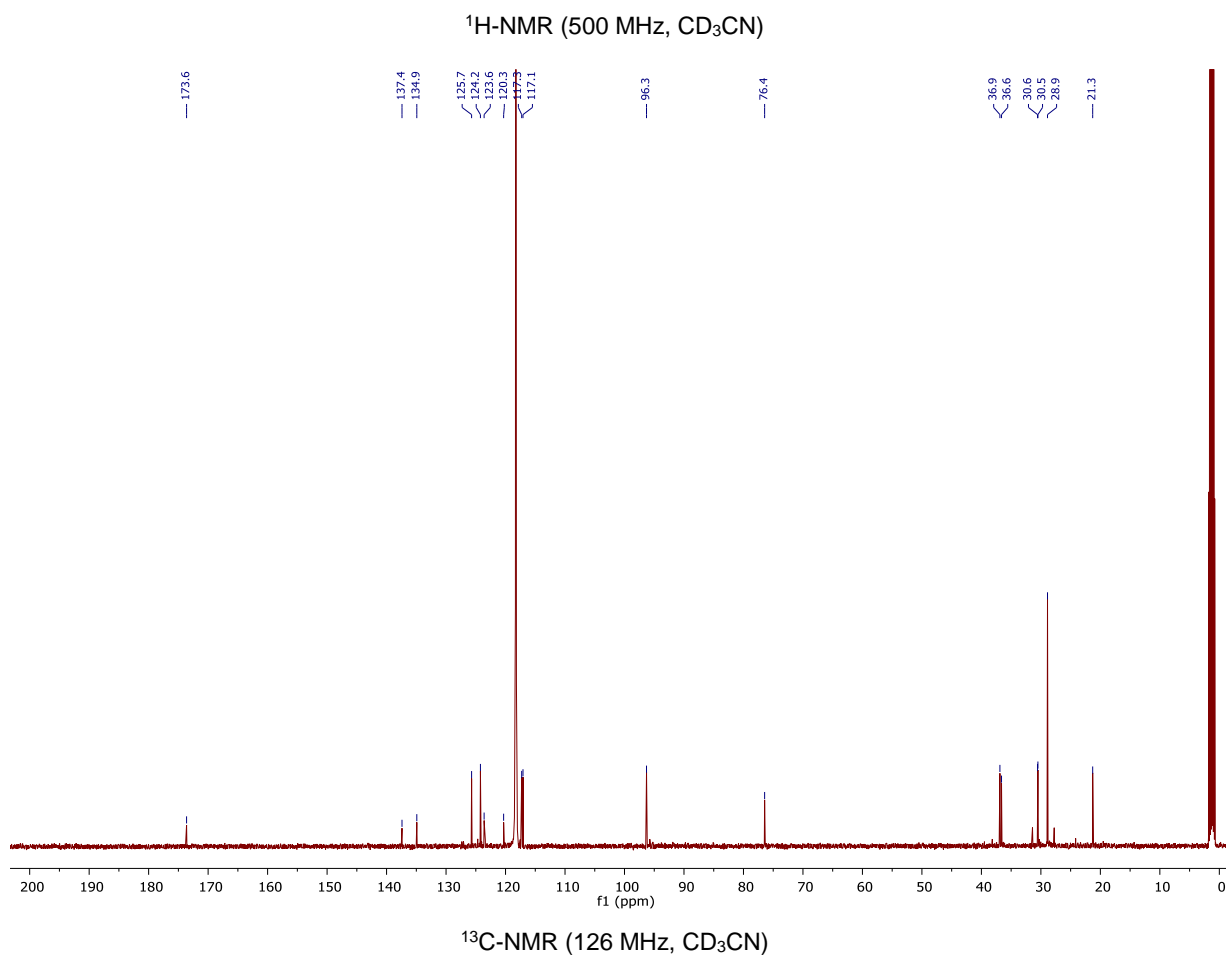

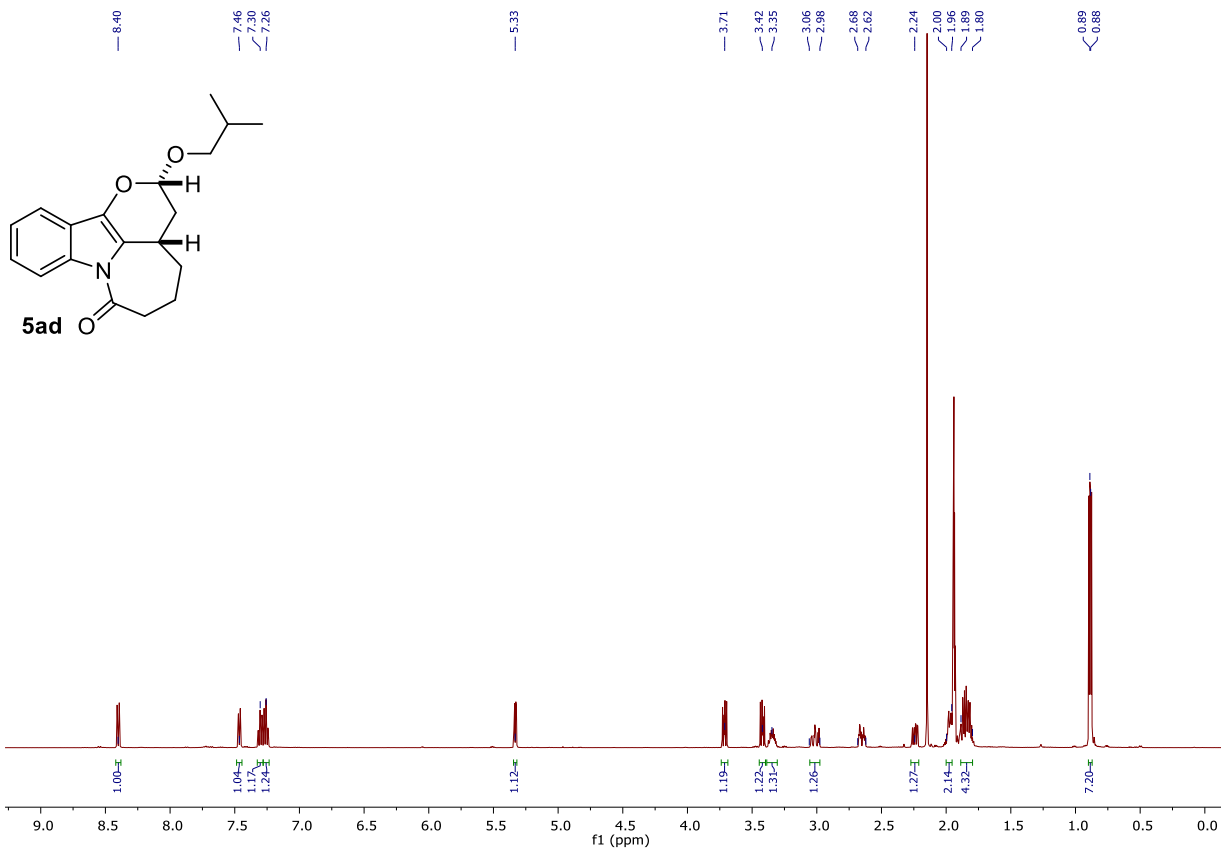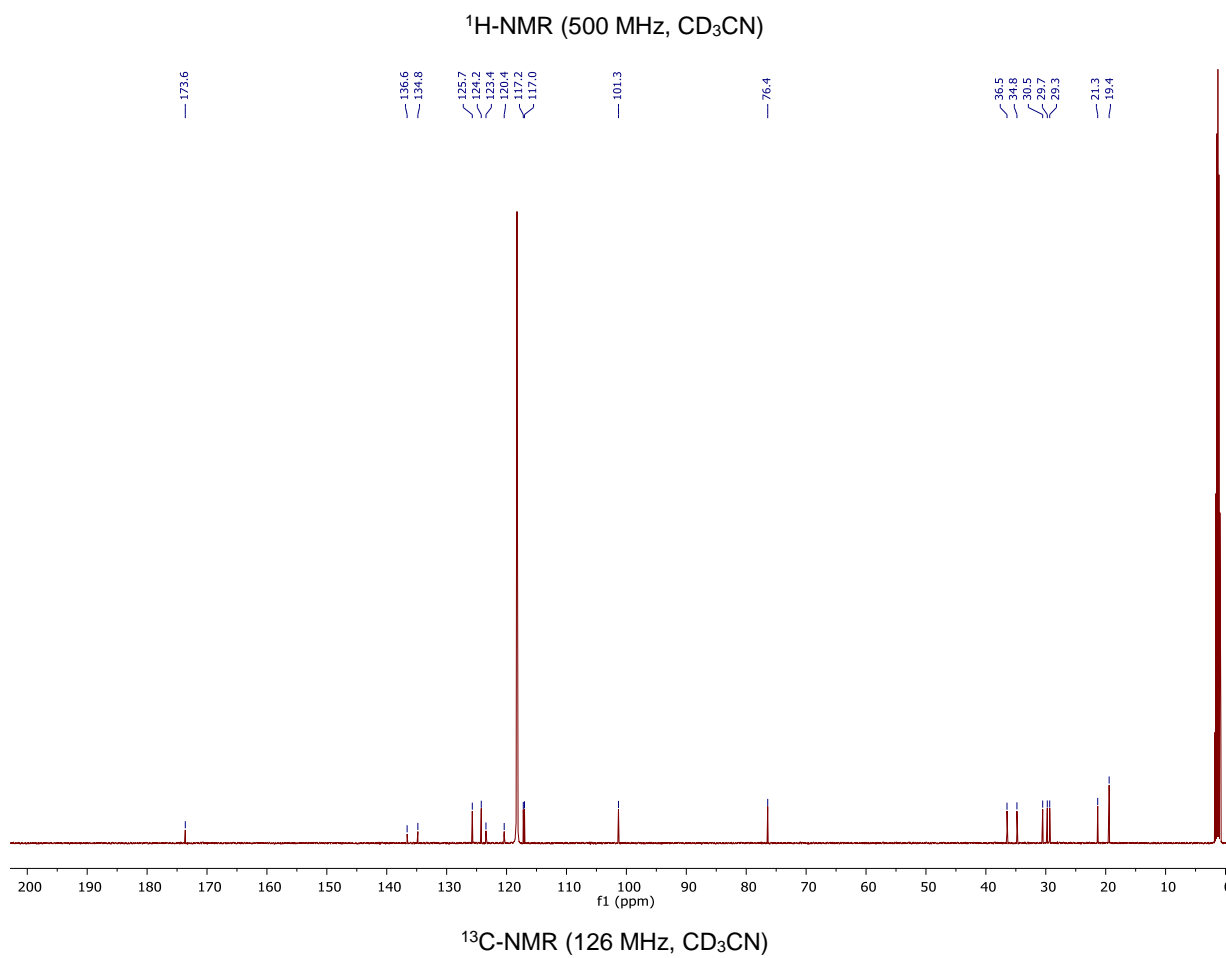

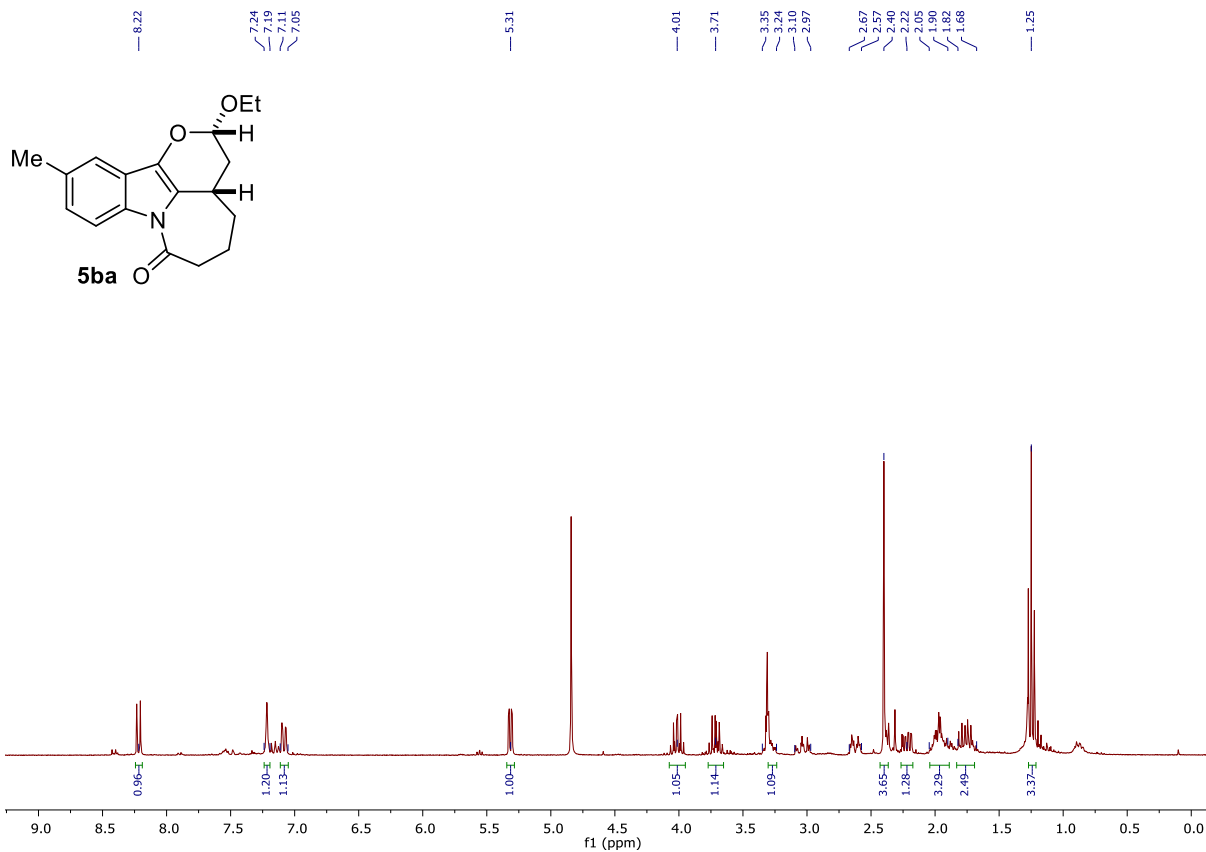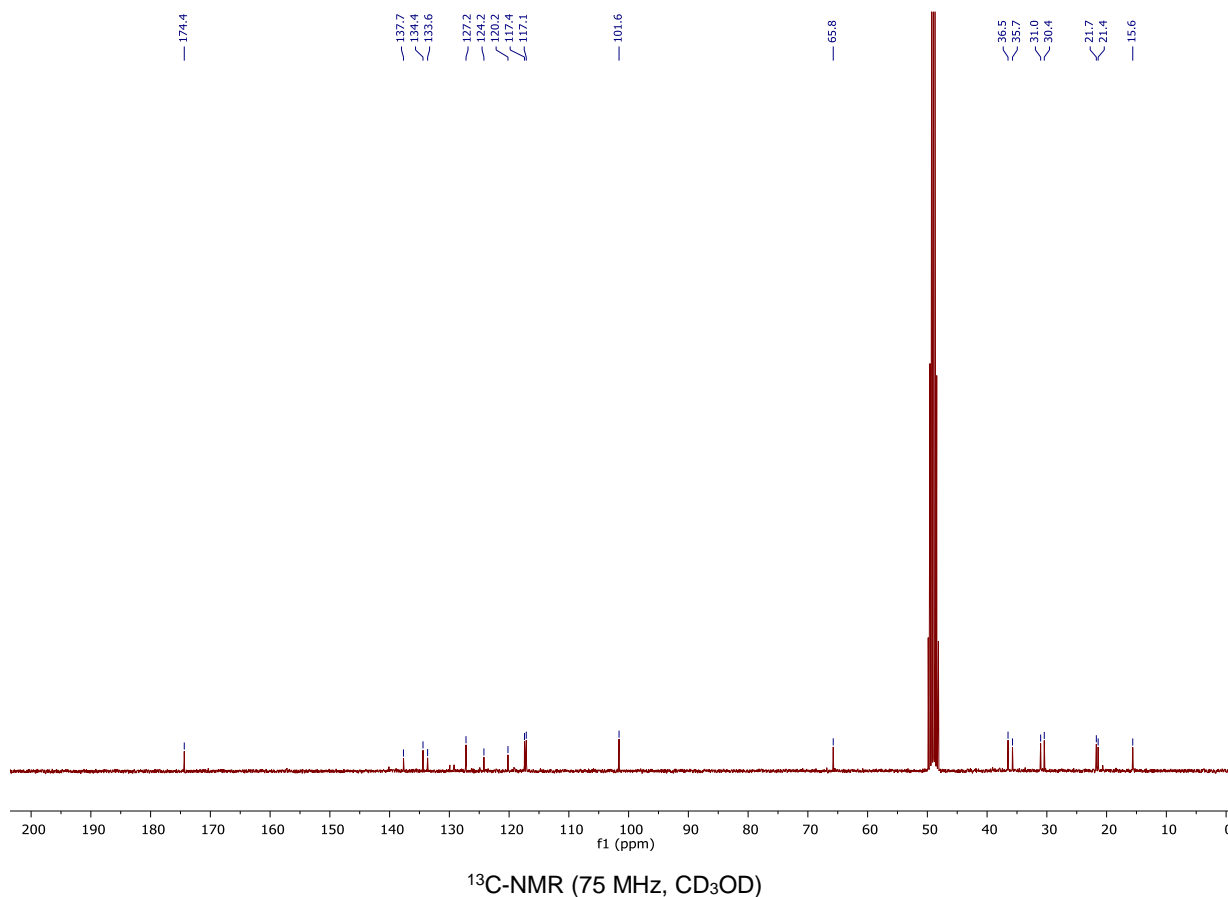

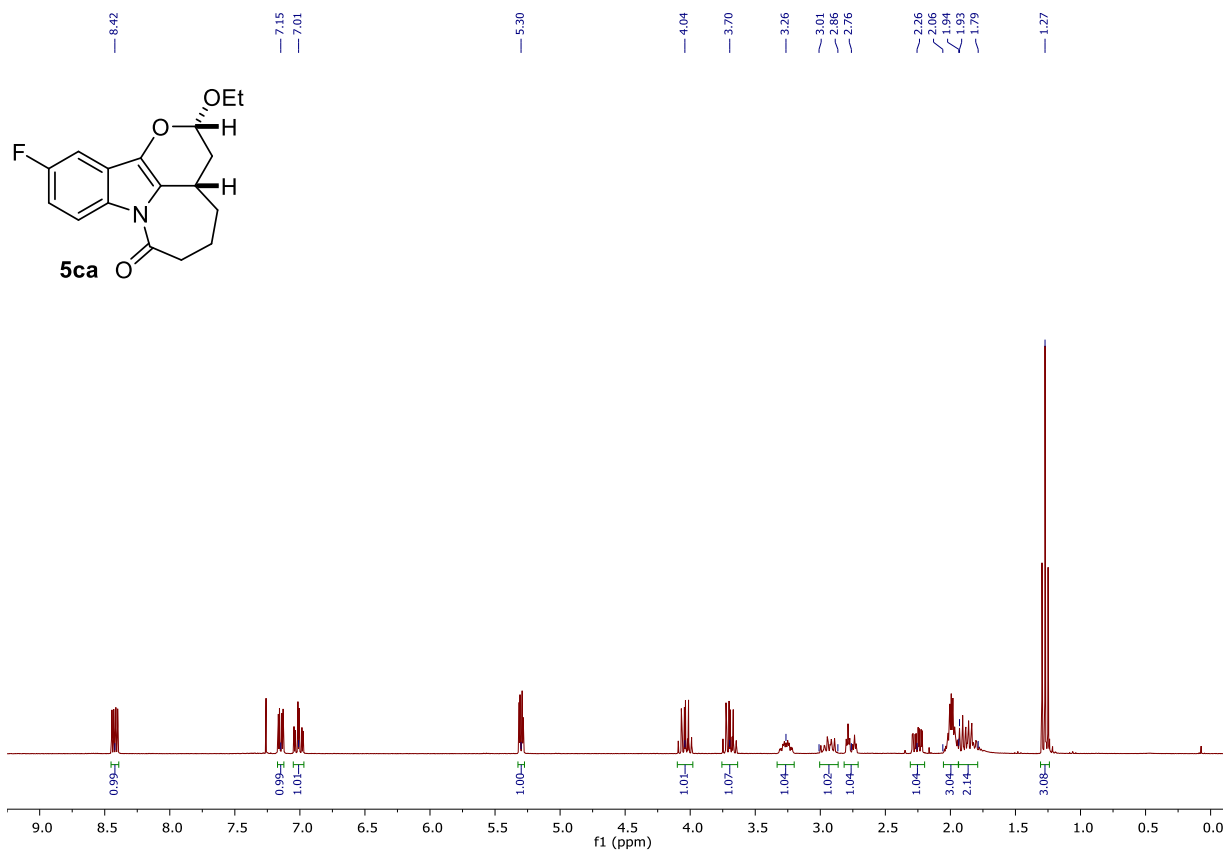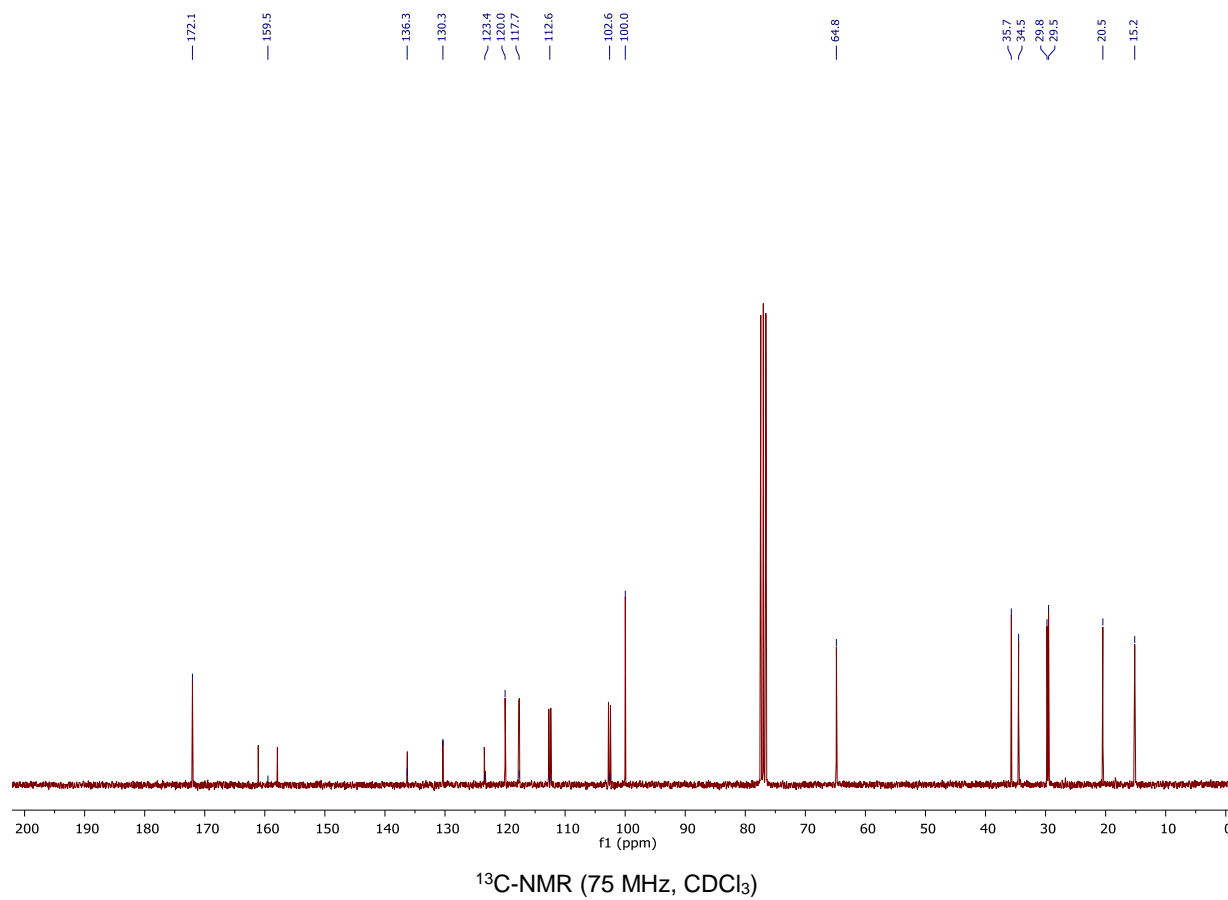

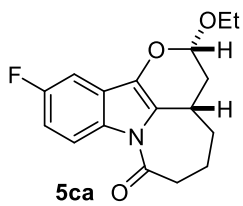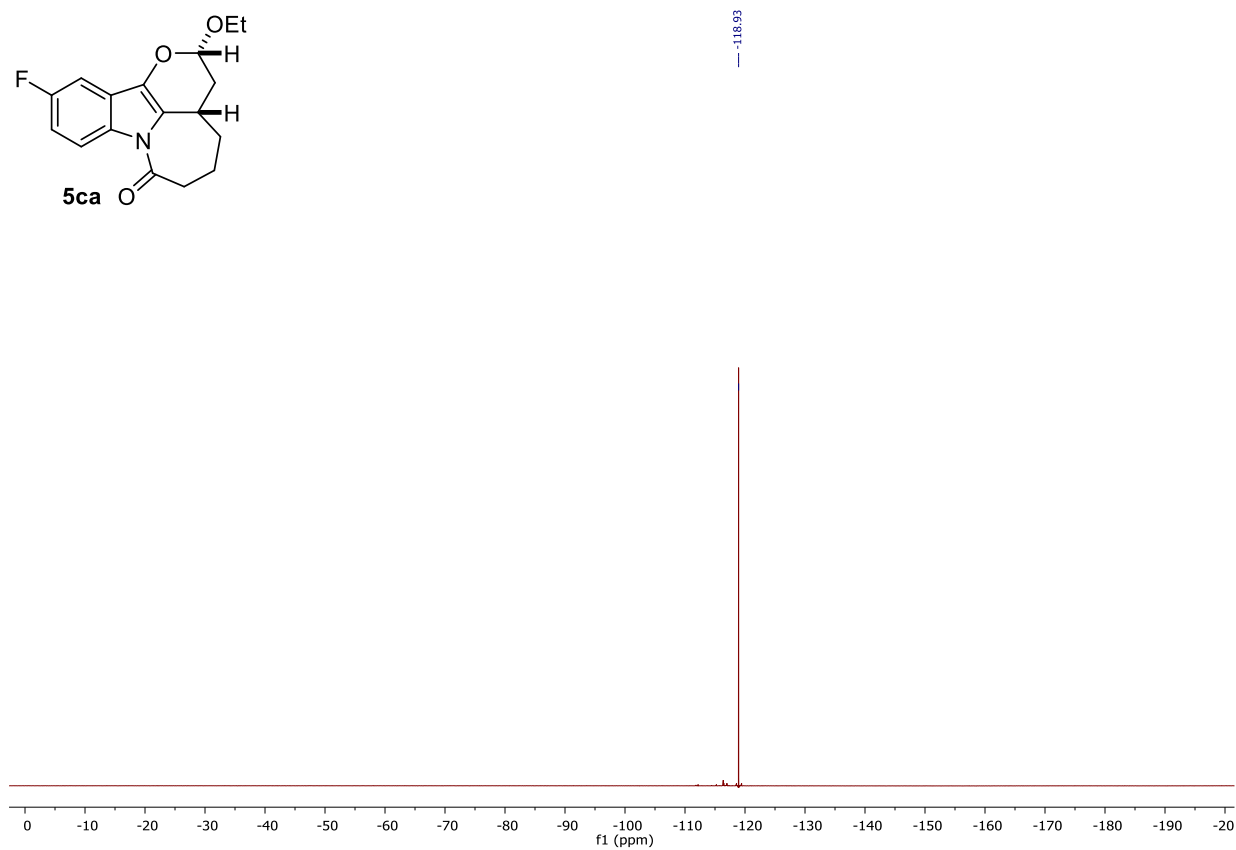

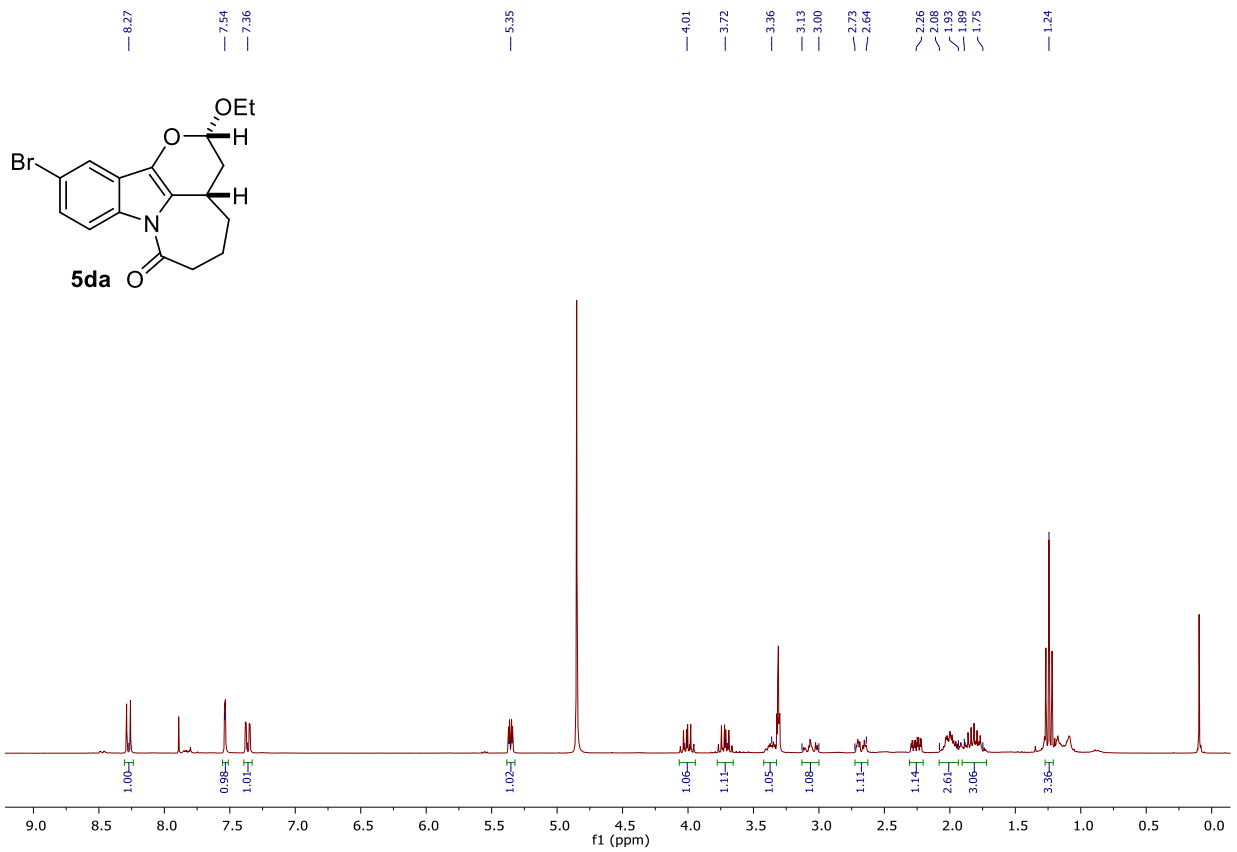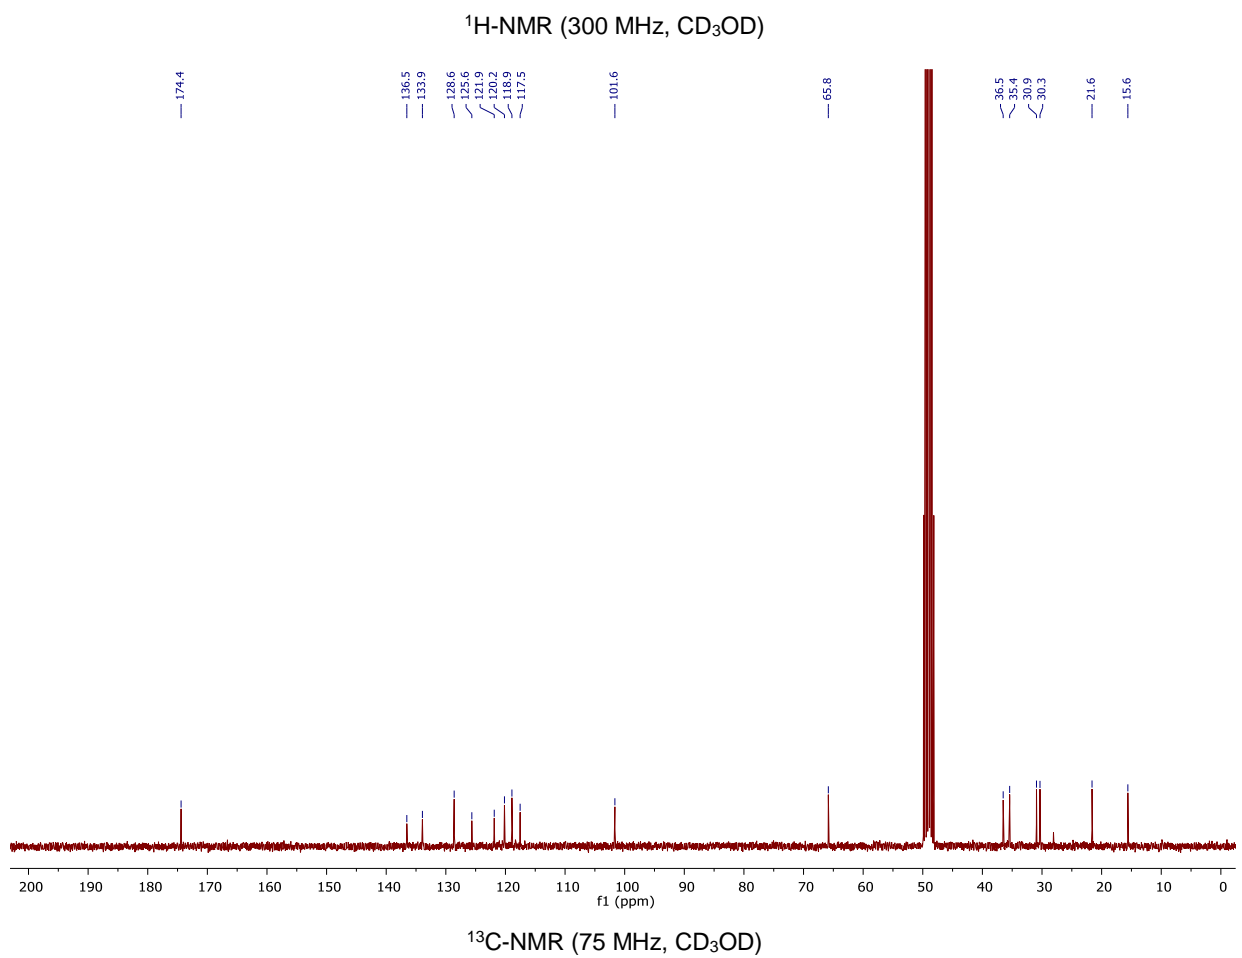



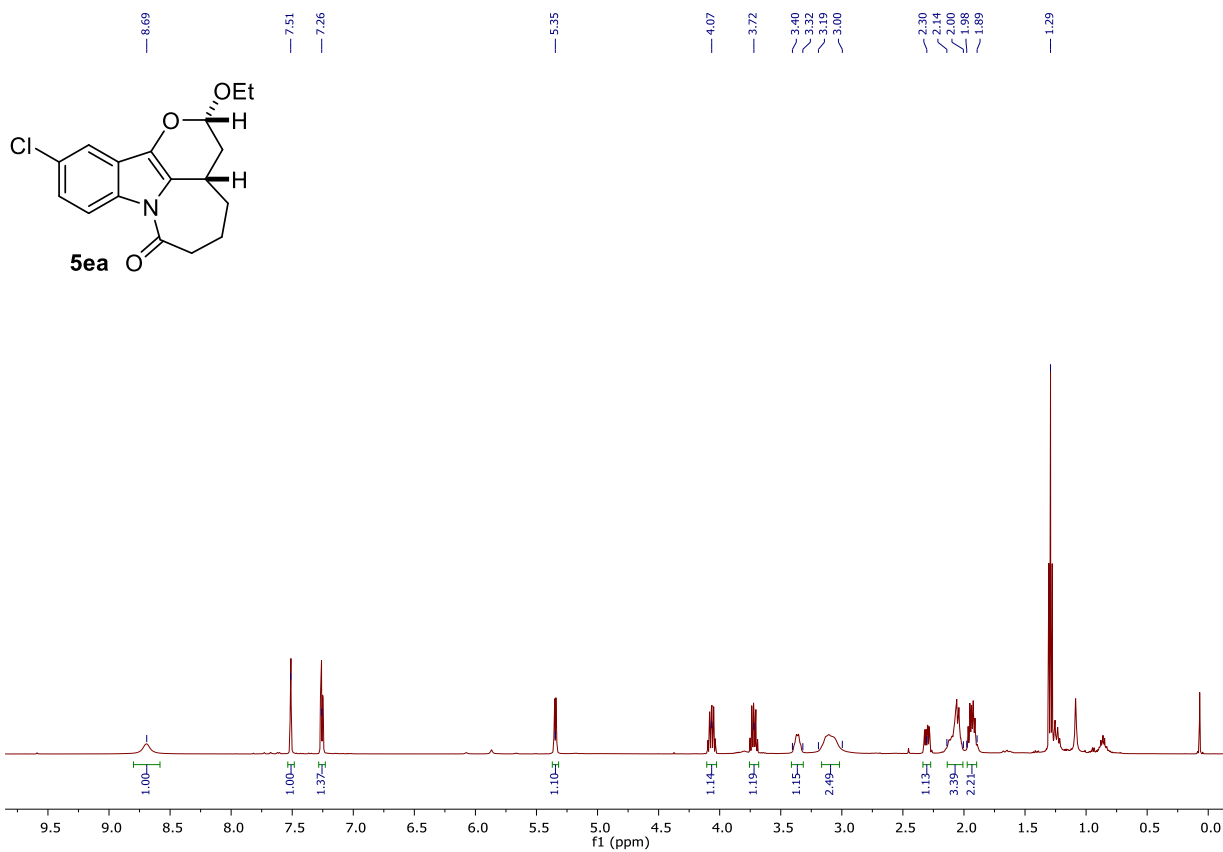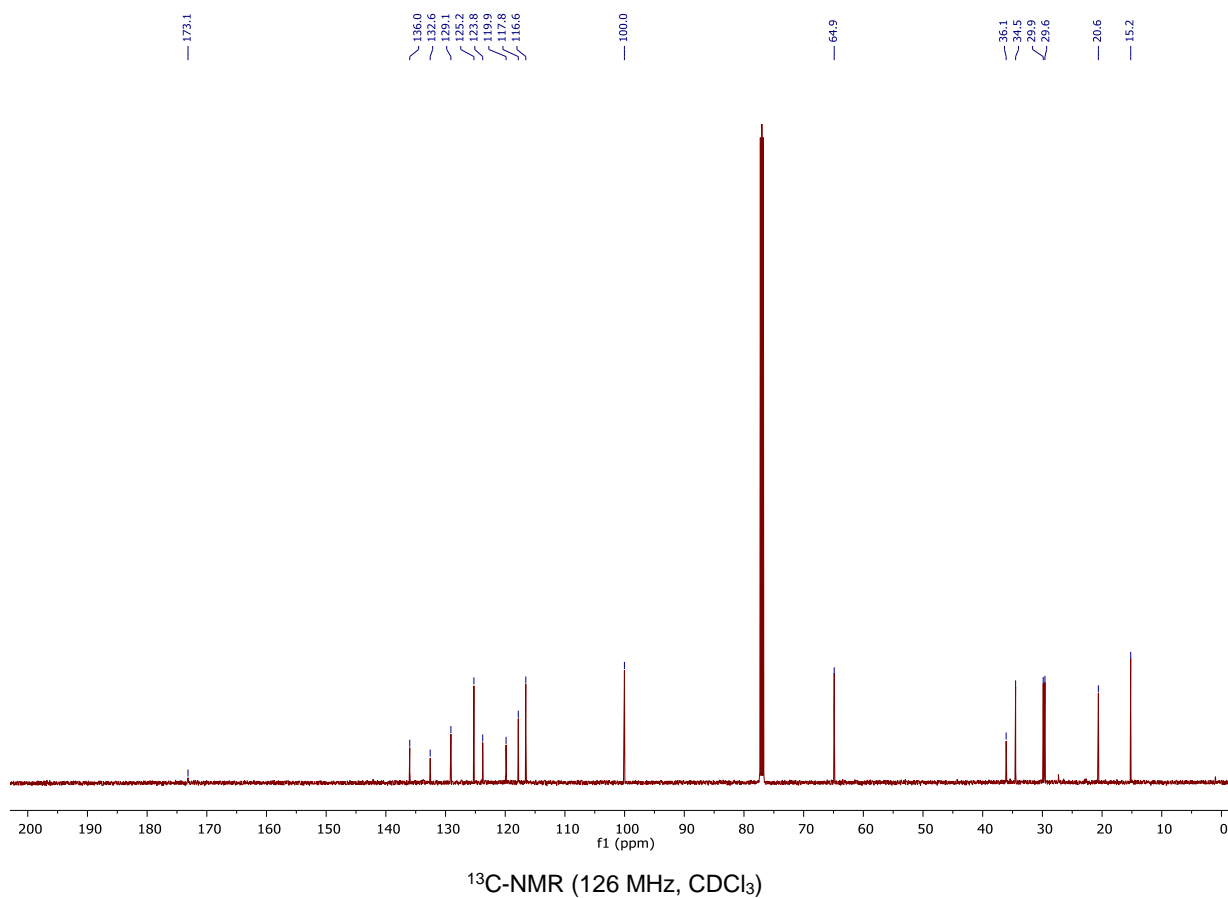

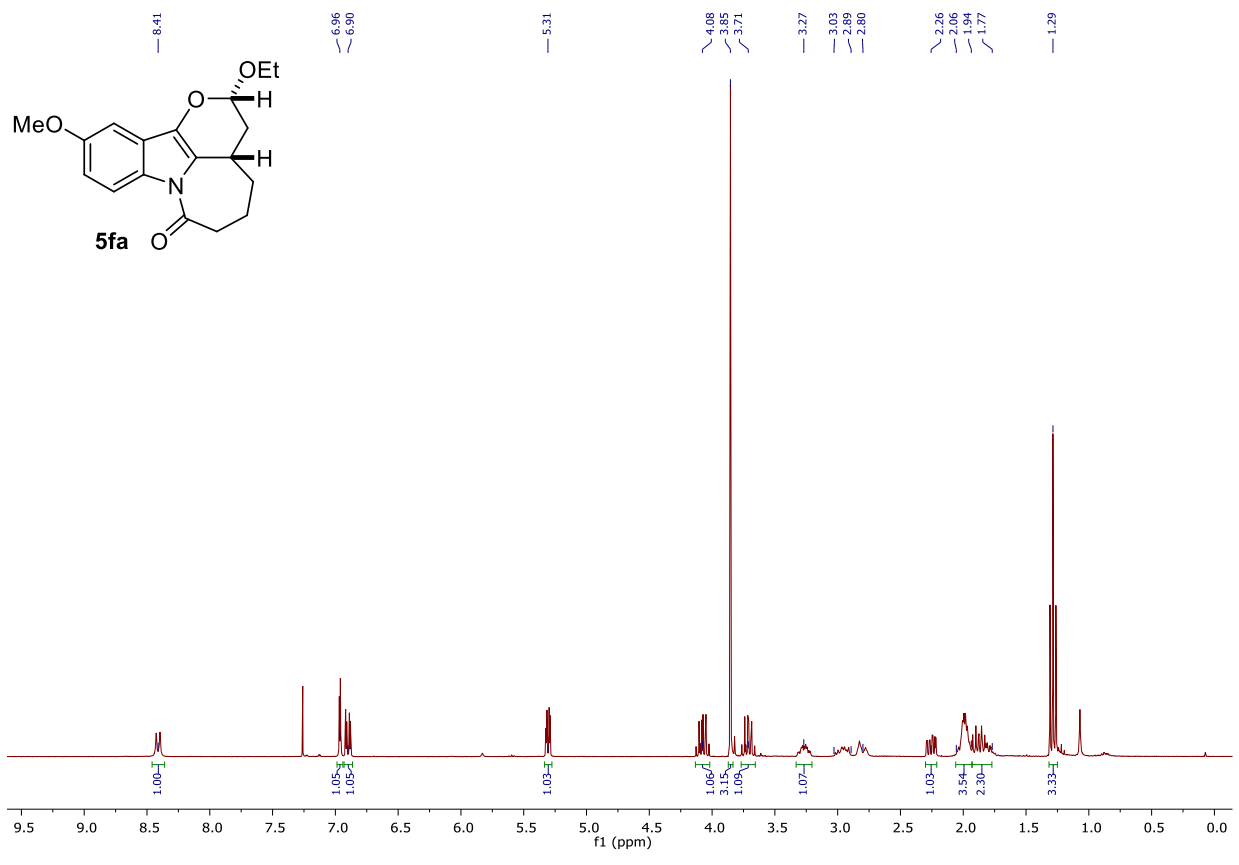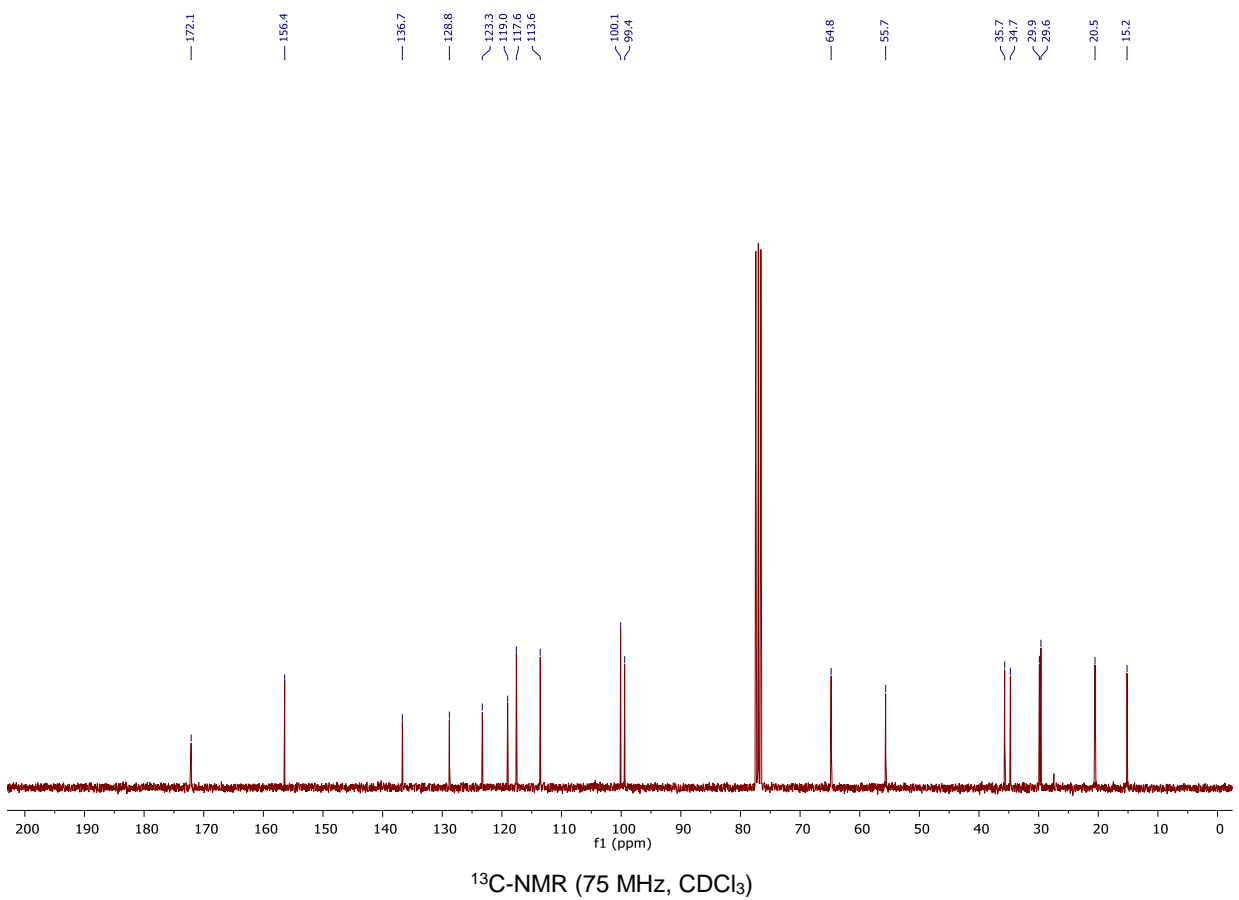

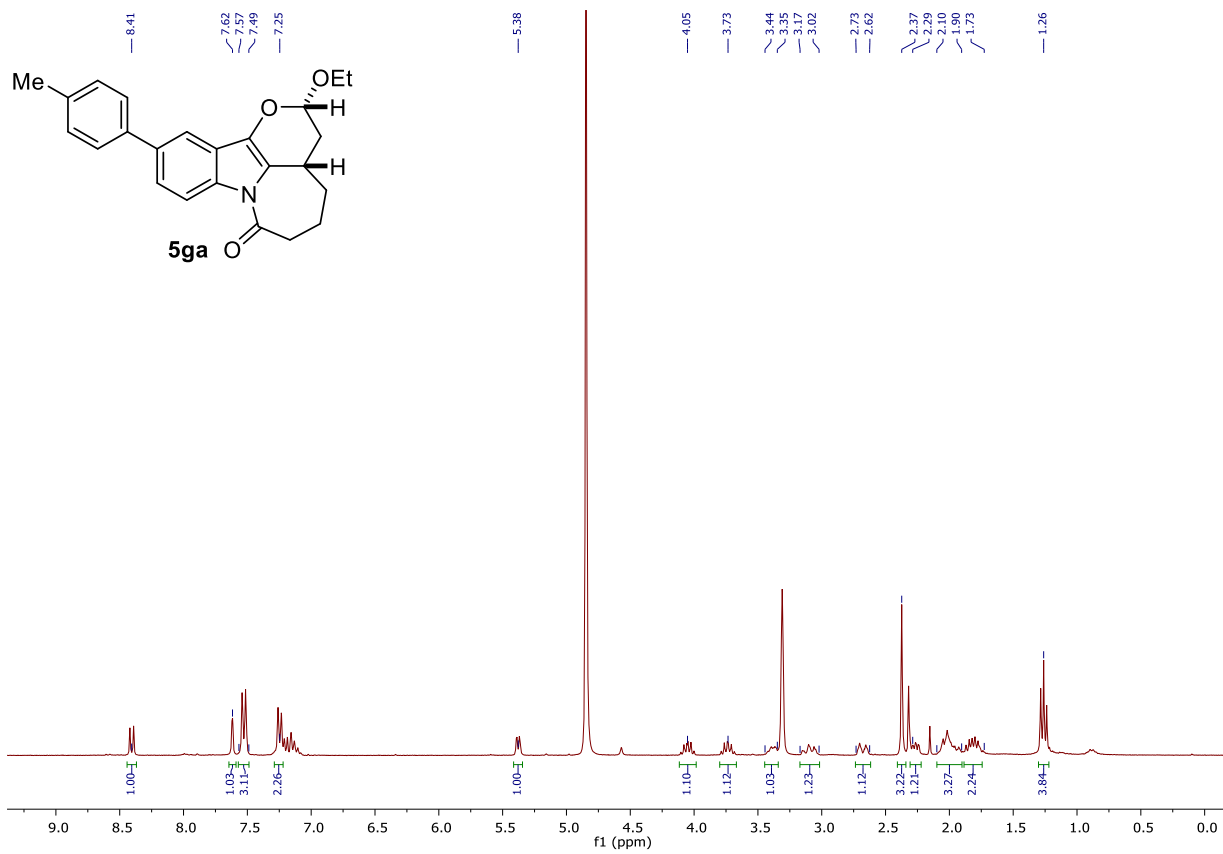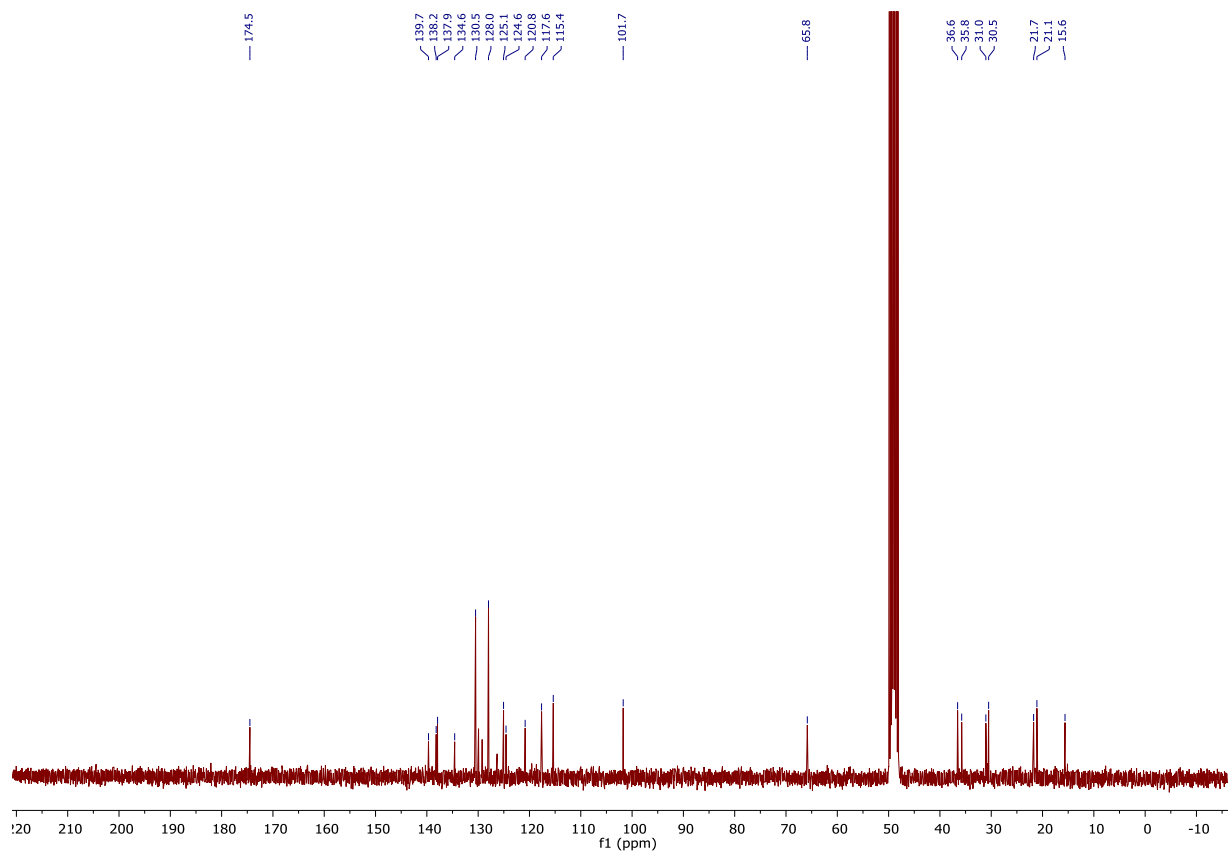

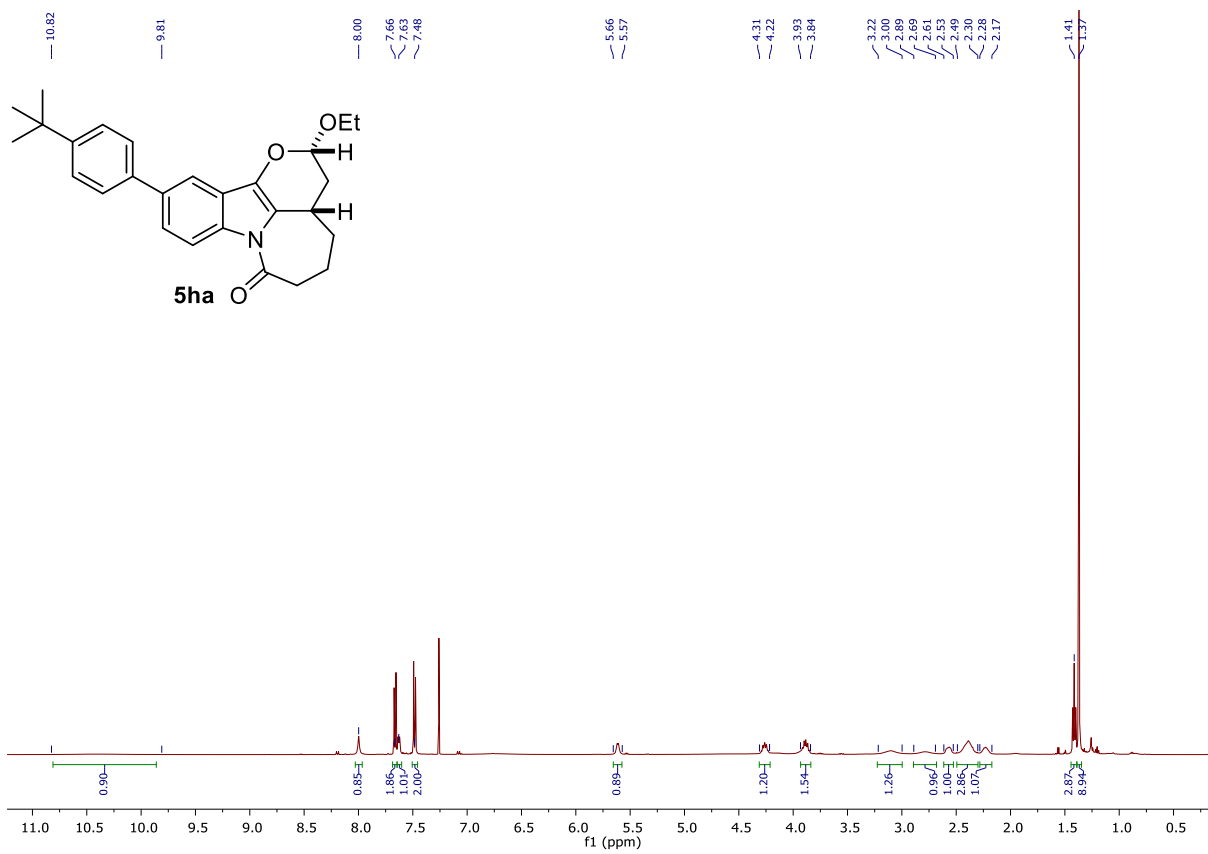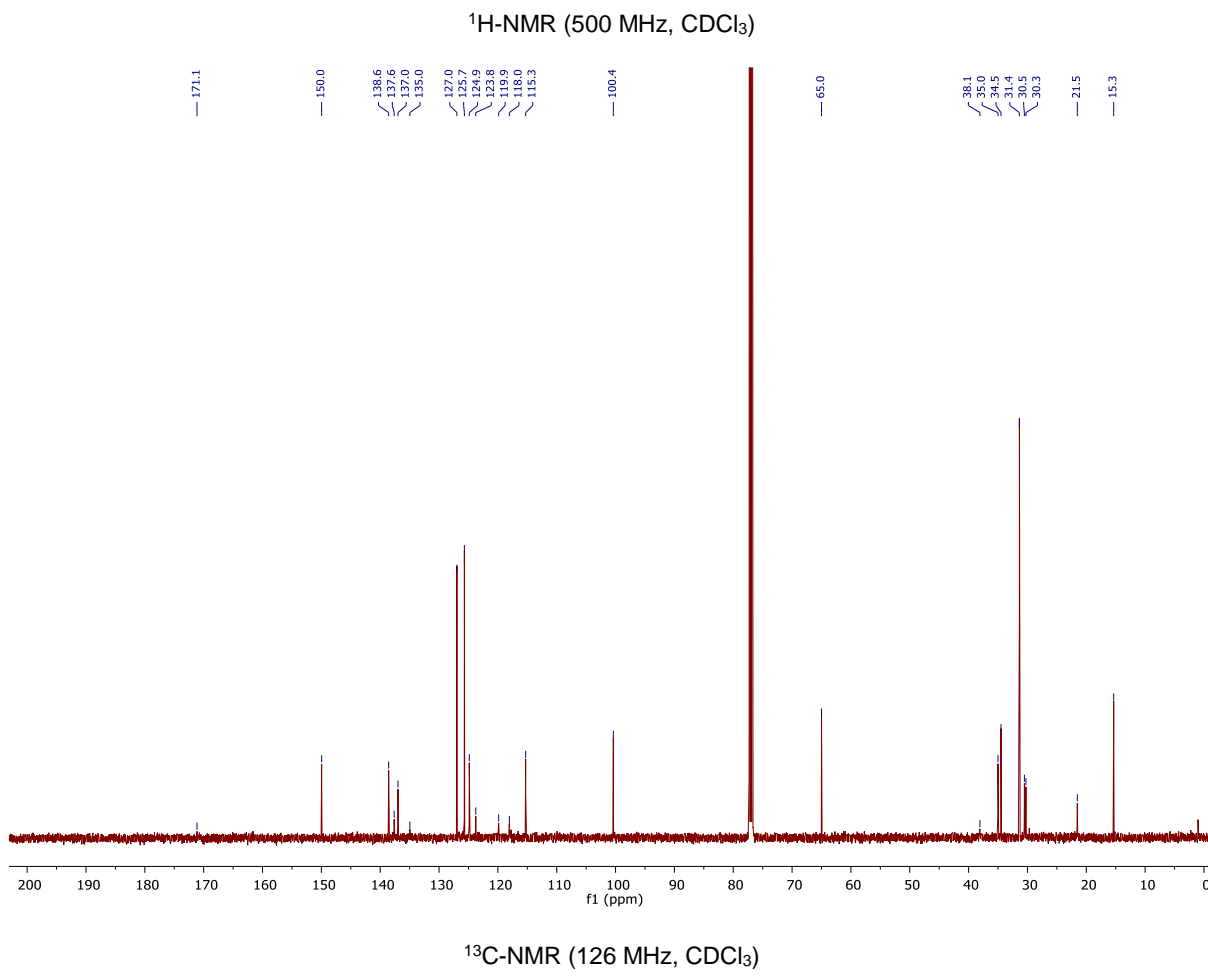

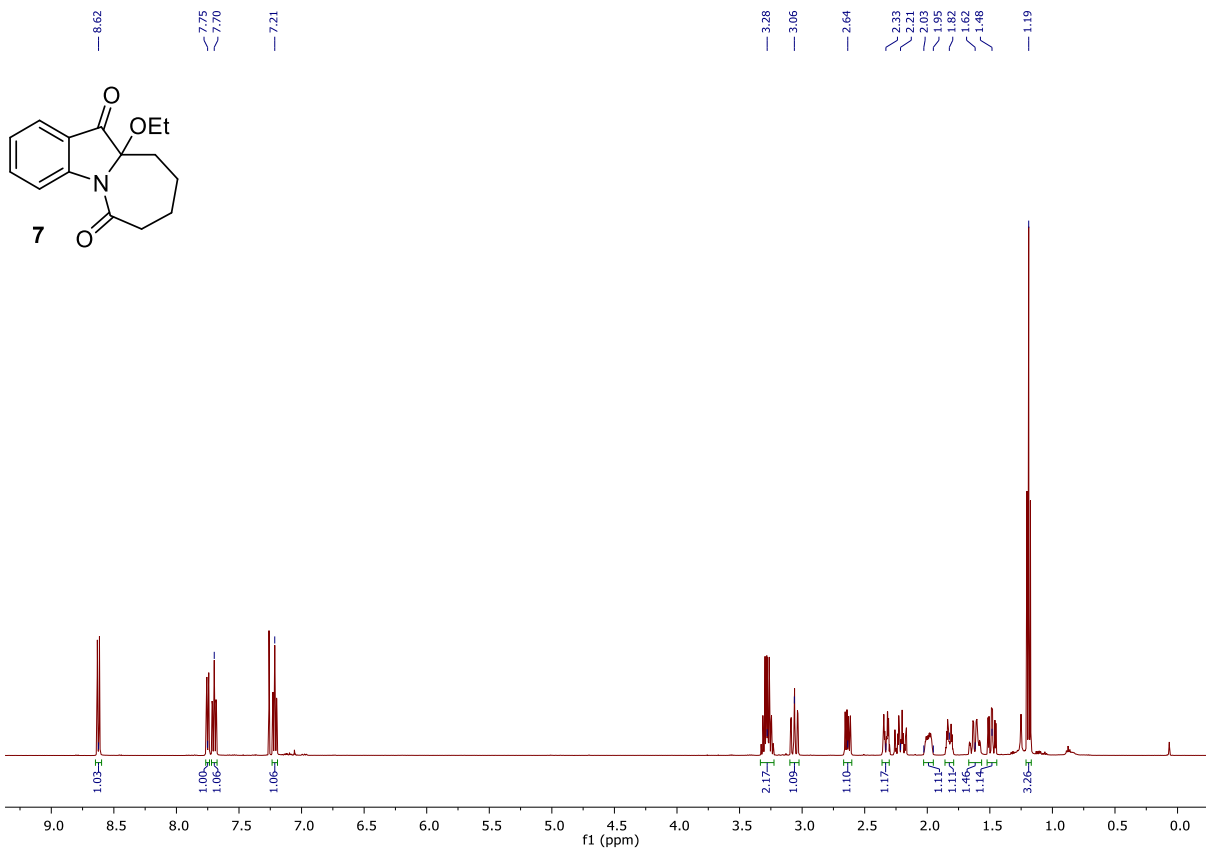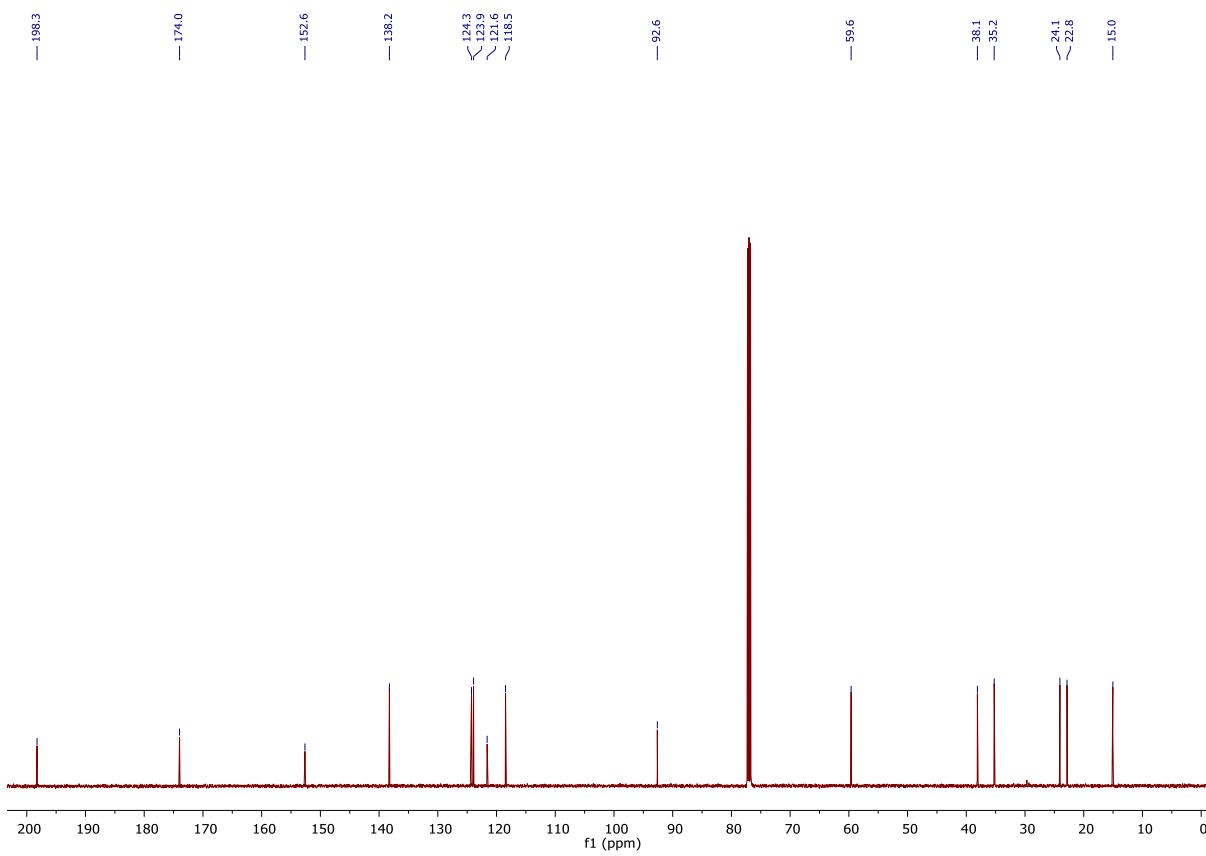

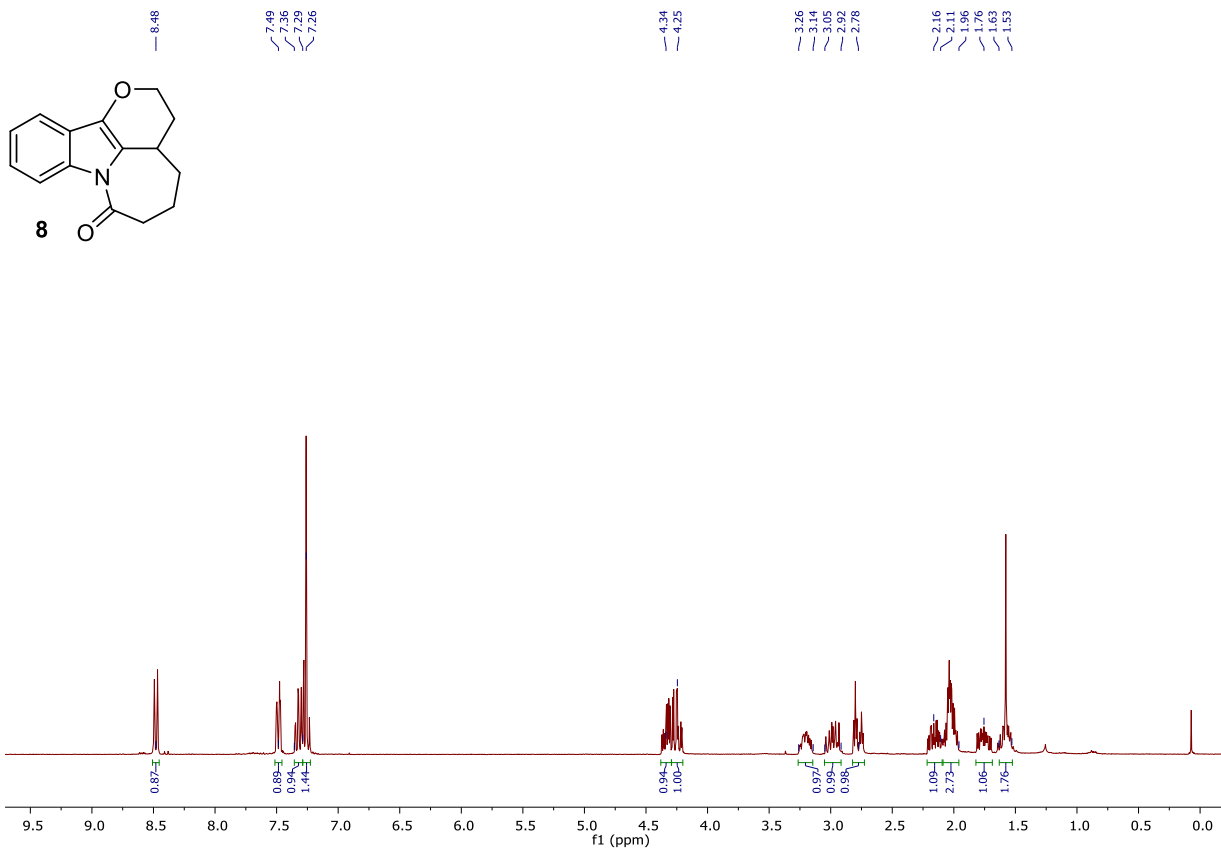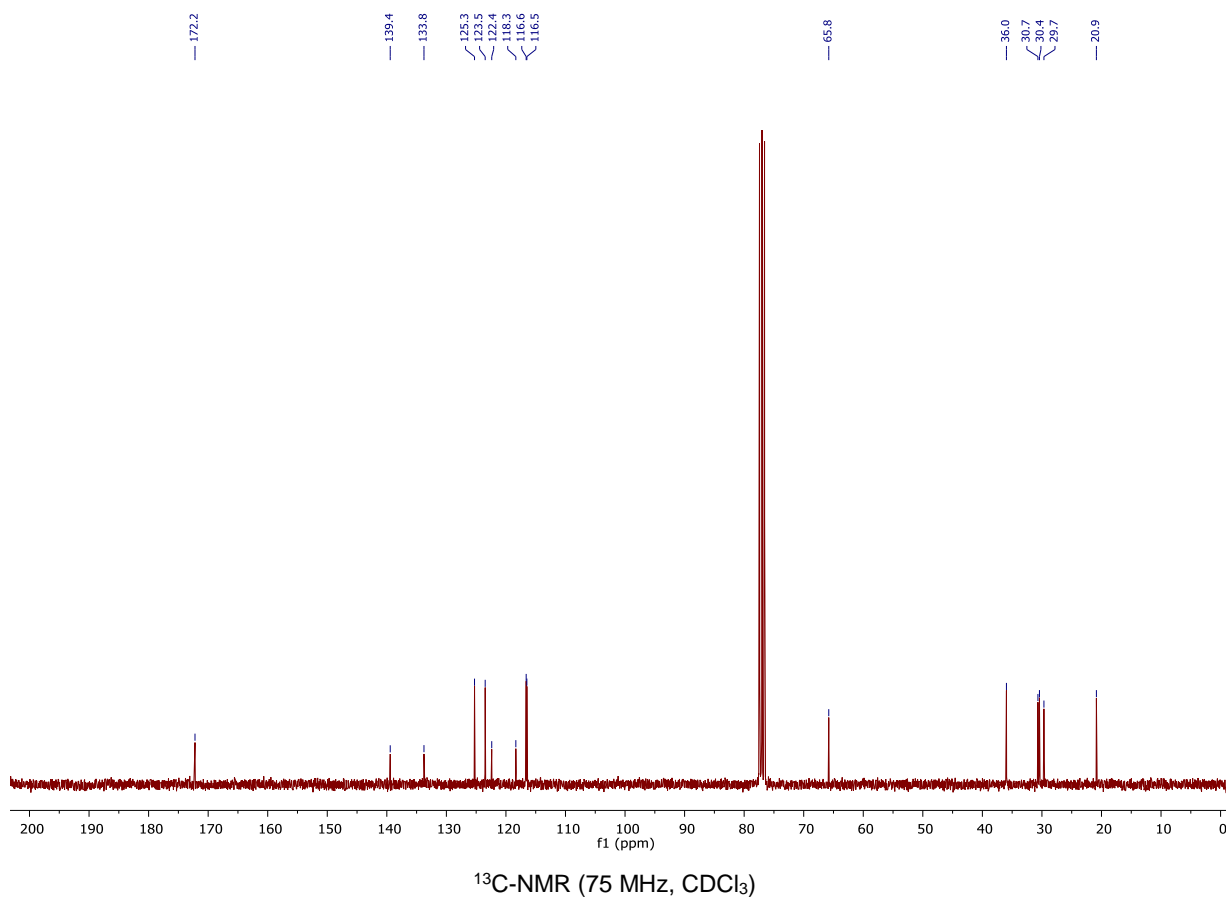

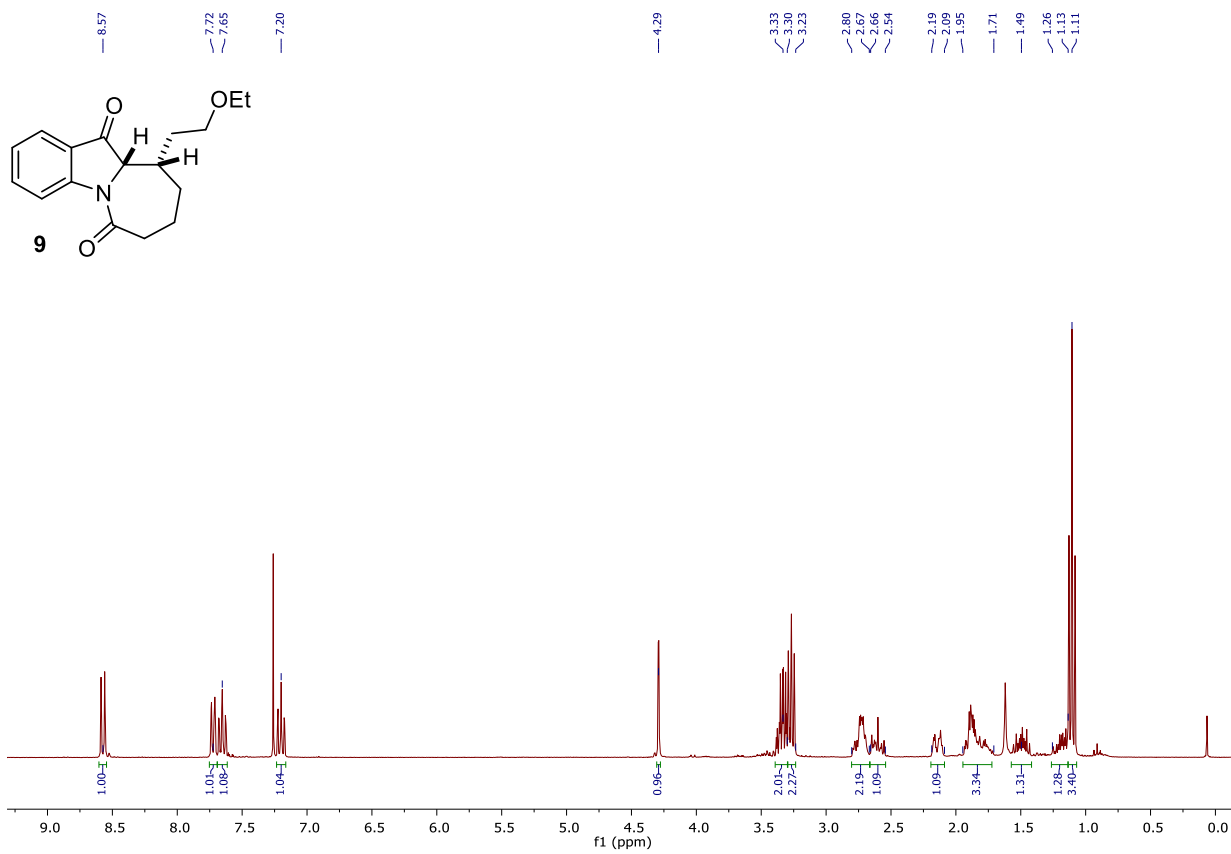

<sup>1</sup>H-NMR (300 MHz, CDCl<sub>3</sub>)

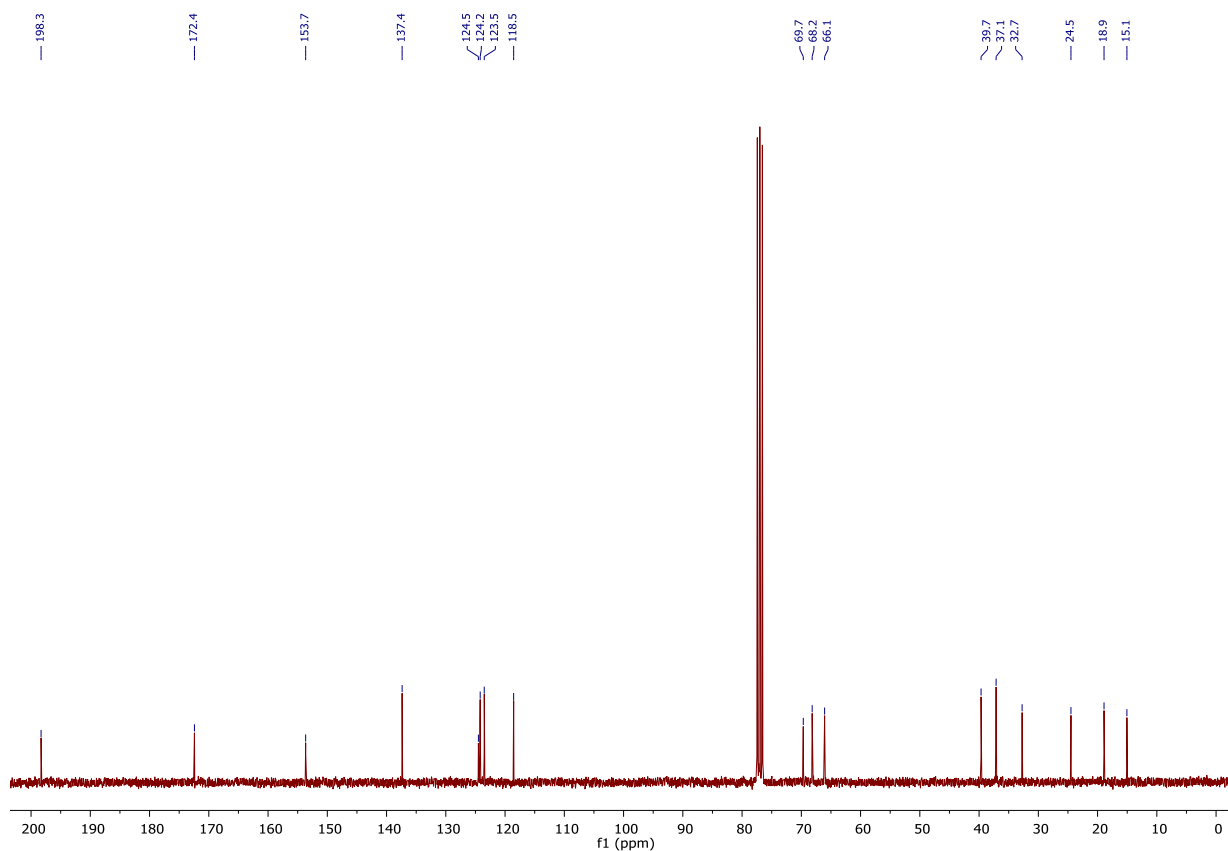

<sup>13</sup>C-NMR (75 MHz, CDCl<sub>3</sub>)
